# Supplementary material for: Causal effects of multiple exposures on endometrial cancer and its subtypes: A two-sample Mendelian randomized study
Source: Research Square preprint supplement (doi:10.21203/rs.3.rs-8340876/v1), 2026-01-16
Supplement: Supplementary file 1 [file 1690de5a6efa760c2fe7cf72.xlsx]

## Sheet: Sheet1
Phenotype	GWAS ID	Year	Sample size	Number of SNPs	Population	Population	Author	Download link	Data extraction parameters
Variation in diet	ukb-b-2909	2018	460884	9851867	European	European	Ben Elsworth	https://opengwas.io/datasets/ukb-b-2909	criterion: F > 10, p < 5×10-8, LD aggregation threshold (r2 < 0.001, within a 10 Mb window),
Salt added to food	ukb-b-8121	2018	462630	9851867	European	European	Ben Elsworth	https://opengwas.io/datasets/ukb-b-8121	criterion: F > 10, p < 5×10-8, LD aggregation threshold (r2 < 0.001, within a 10 Mb window),
Average weekly beer plus cider intake	ukb-b-5174	2018	327634	9851867	European	European	Ben Elsworth	https://opengwas.io/datasets/ukb-b-5174	criterion: F > 10, p < 5×10-8, LD aggregation threshold (r2 < 0.001, within a 10 Mb window),
Gastroesophageal reflux disease	ebi-a-GCST90000514	2021	602604	2320781	European	European	Ong JS	https://opengwas.io/datasets/ebi-a-GCST90000514	criterion: F > 10, p < 5×10-8, LD aggregation threshold (r2 < 0.001, within a 10 Mb window),
Ulcerative colitis	ieu-a-973	2011	26405	1243971	European	European	Anderson CA	https://opengwas.io/datasets/ieu-a-973	criterion: F > 10, p < 5×10-8, LD aggregation threshold (r2 < 0.001, within a 10 Mb window),
Celiac disease	ebi-a-GCST005523	2011	23649	97422	European	European	Trynka G	https://opengwas.io/datasets/ebi-a-GCST005523	criterion: F > 10, p < 5×10-8, LD aggregation threshold (r2 < 0.001, within a 10 Mb window),
Age first had sexual intercourse	ukb-b-6591	2018	406457	9851867	European	European	Ben Elsworth	https://opengwas.io/datasets/ukb-b-6591	criterion: F > 10, p < 5×10-8, LD aggregation threshold (r2 < 0.001, within a 10 Mb window),
Length of menstrual cycle	ukb-a-351	2017	30245	10894596	European	European	Neale	https://opengwas.io/datasets/ukb-a-351	criterion: F > 10, p < 5×10-8, LD aggregation threshold (r2 < 0.001, within a 10 Mb window),
Comparative body size at age 10	ukb-a-34	2017	331693	10894596	European	European	Neale	https://opengwas.io/datasets/ukb-a-34	criterion: F > 10, p < 5×10-8, LD aggregation threshold (r2 < 0.001, within a 10 Mb window),
Parental longevity (father's attained age)	ebi-a-GCST006701	2017	415311	11489837	European	European	Pilling LC	https://opengwas.io/datasets/ebi-a-GCST006701	criterion: F > 10, p < 5×10-8, LD aggregation threshold (r2 < 0.001, within a 10 Mb window),
Parental longevity (mother's attained age)	ebi-a-GCST006696	2017	412937	11490494	European	European	Pilling LC	https://opengwas.io/datasets/ebi-a-GCST006696	criterion: F > 10, p < 5×10-8, LD aggregation threshold (r2 < 0.001, within a 10 Mb window),
Endometrial cancer	ebi-a-GCST006464	2018	121885	9470555	European	European	O'Mara TA	https://opengwas.io/datasets/ebi-a-GCST006464	criterion: F > 10, p < 5×10-8, LD aggregation threshold (r2 < 0.001, within a 10 Mb window),
Endometrial cancer (endometrioid histology)	ebi-a-GCST006465	2018	54884	9464330	European	European	O'Mara TA	https://opengwas.io/datasets/ebi-a-GCST006465	criterion: F > 10, p < 5×10-8, LD aggregation threshold (r2 < 0.001, within a 10 Mb window),
Endometrial cancer (Non-endometrioid histology)	ebi-a-GCST006466	2018	36677	8974630	European	European	O'Mara TA	https://opengwas.io/datasets/ebi-a-GCST006466	criterion: F > 10, p < 5×10-8, LD aggregation threshold (r2 < 0.001, within a 10 Mb window),
