# Supplementary material for: Causal effects of multiple exposures on endometrial cancer and its subtypes: A two-sample Mendelian randomized study
Source: Research Square preprint supplement (doi:10.21203/rs.3.rs-8340876/v1), 2026-01-16
Supplement: Supplementary file 2 [file 4ff05b0da3a6590e24ccca0a.xlsx]

## Sheet: Sheet1
id.exposure	id.outcome	outcome	exposure	egger_intercept	se	pval
Variation in diet	Endometrial cancer	ebi-a-GCST006464	Variation in diet || id:ukb-b-2909	-0.0264619	0.0411181	0.531051
Salt added to food	Endometrial cancer	ebi-a-GCST006464	Salt added to food || id:ukb-b-8121	0.00392803	0.00695545	0.573502
Average weekly beer plus cider intake	Endometrial cancer	ebi-a-GCST006464	Average weekly beer plus cider intake || id:ukb-b-5174	0.0240559	0.0142004	0.107493
Gastroesophageal reflux disease	Endometrial cancer	ebi-a-GCST006464	Gastroesophageal reflux disease || id:ebi-a-GCST90000514	-0.00709937	0.0112041	0.528242
Ulcerative colitis	Endometrial cancer	ebi-a-GCST006464	Ulcerative colitis || id:ieu-a-973	-0.00408026	0.00569518	0.475859
Celiac disease	Endometrial cancer	ebi-a-GCST006464	Celiac disease || id:ebi-a-GCST005523	0.00448835	0.00635942	0.484996
Age first had sexual intercourse	Endometrial cancer	ebi-a-GCST006464	Age first had sexual intercourse || id:ukb-b-6591	-0.00112136	0.00609269	0.854173
Length of menstrual cycle	Endometrial cancer	ebi-a-GCST006464	Length of menstrual cycle || id:ukb-a-351	0.00477394	0.0174861	0.798359
Comparative body size at age 10	Endometrial cancer	ebi-a-GCST006464	Comparative body size at age 10 || id:ukb-a-34	-0.00637015	0.00368838	0.0861703
Parental longevity (father's attained age)	Endometrial cancer	ebi-a-GCST006464	Parental longevity (father's attained age) || id:ebi-a-GCST006701	0.0144595	0.019981	0.484377
Parental longevity (mother's attained age)	Endometrial cancer	ebi-a-GCST006464	Parental longevity (mother's attained age) || id:ebi-a-GCST006696	-0.0299653	0.039322	0.525635
Variation in diet	Endometrial cancer (endometrioid histology)	ebi-a-GCST006465	Variation in diet || id:ukb-b-2909	-0.0281092	0.0519593	0.597666
Salt added to food	Endometrial cancer (endometrioid histology)	ebi-a-GCST006465	Salt added to food || id:ukb-b-8121	0.00177131	0.00808193	0.826961
Average weekly beer plus cider intake	Endometrial cancer (endometrioid histology)	ebi-a-GCST006465	Average weekly beer plus cider intake || id:ukb-b-5174	0.0285877	0.017569	0.12108
Gastroesophageal reflux disease	Endometrial cancer (endometrioid histology)	ebi-a-GCST006465	Gastroesophageal reflux disease || id:ebi-a-GCST90000514	-0.00773786	0.0130862	0.556097
Ulcerative colitis	Endometrial cancer (endometrioid histology)	ebi-a-GCST006465	Ulcerative colitis || id:ieu-a-973	-0.00791486	0.00670744	0.241582
Celiac disease	Endometrial cancer (endometrioid histology)	ebi-a-GCST006465	Celiac disease || id:ebi-a-GCST005523	-0.00018329	0.00717457	0.979764
Age first had sexual intercourse	Endometrial cancer (endometrioid histology)	ebi-a-GCST006465	Age first had sexual intercourse || id:ukb-b-6591	-0.000819646	0.00744915	0.912501
Length of menstrual cycle	Endometrial cancer (endometrioid histology)	ebi-a-GCST006465	Length of menstrual cycle || id:ukb-a-351	0.000352908	0.0188085	0.985929
Comparative body size at age 10	Endometrial cancer (endometrioid histology)	ebi-a-GCST006465	Comparative body size at age 10 || id:ukb-a-34	-0.00537016	0.00432964	0.216754
Parental longevity (father's attained age)	Endometrial cancer (endometrioid histology)	ebi-a-GCST006465	Parental longevity (father's attained age) || id:ebi-a-GCST006701	0.00457699	0.0210617	0.831942
Parental longevity (mother's attained age)	Endometrial cancer (endometrioid histology)	ebi-a-GCST006465	Parental longevity (mother's attained age) || id:ebi-a-GCST006696	-0.0295638	0.0285497	0.409218
Variation in diet	Endometrial cancer (Non-endometrioid histology)	ebi-a-GCST006466	Variation in diet || id:ukb-b-2909	-0.0207944	0.095586	0.83116
Salt added to food	Endometrial cancer (Non-endometrioid histology)	ebi-a-GCST006466	Salt added to food || id:ukb-b-8121	0.00232685	0.0168427	0.890396
Average weekly beer plus cider intake	Endometrial cancer (Non-endometrioid histology)	ebi-a-GCST006466	Average weekly beer plus cider intake || id:ukb-b-5174	0.0784747	0.0394282	0.0619633
Gastroesophageal reflux disease	Endometrial cancer (Non-endometrioid histology)	ebi-a-GCST006466	Gastroesophageal reflux disease || id:ebi-a-GCST90000514	-0.0103467	0.0325459	0.751435
Ulcerative colitis	Endometrial cancer (Non-endometrioid histology)	ebi-a-GCST006466	Ulcerative colitis || id:ieu-a-973	-0.00979019	0.0198647	0.623582
Celiac disease	Endometrial cancer (Non-endometrioid histology)	ebi-a-GCST006466	Celiac disease || id:ebi-a-GCST005523	0.00803635	0.0135437	0.556648
Age first had sexual intercourse	Endometrial cancer (Non-endometrioid histology)	ebi-a-GCST006466	Age first had sexual intercourse || id:ukb-b-6591	-0.000948911	0.0182232	0.958527
Length of menstrual cycle	Endometrial cancer (Non-endometrioid histology)	ebi-a-GCST006466	Length of menstrual cycle || id:ukb-a-351	-0.0295831	0.076567	0.718896
Comparative body size at age 10	Endometrial cancer (Non-endometrioid histology)	ebi-a-GCST006466	Comparative body size at age 10 || id:ukb-a-34	-0.00566373	0.00944204	0.549494
Parental longevity (father's attained age)	Endometrial cancer (Non-endometrioid histology)	ebi-a-GCST006466	Parental longevity (father's attained age) || id:ebi-a-GCST006701	0.0506875	0.0505831	0.336091
Parental longevity (mother's attained age)	Endometrial cancer (Non-endometrioid histology)	ebi-a-GCST006466	Parental longevity (mother's attained age) || id:ebi-a-GCST006696	0.0122937	0.108261	0.919961
