# Supplementary material for: Causal effects of multiple exposures on endometrial cancer and its subtypes: A two-sample Mendelian randomized study
Source: Research Square preprint supplement (doi:10.21203/rs.3.rs-8340876/v1), 2026-01-16
Supplement: Supplementary file 3 [file 8352bced53412faf1f558e1c.docx]

**Supplementary Table 1** Detailed description of exposures and the rationality of their inclusion.

| **Exposure** | **Category** | **Rational for Inclusion** |
| --- | --- | --- |
| Variation in diet | Lifestyle | Irregular diet, such as intermittent overeating and prolonged fasting, can cause fluctuations in blood sugar, increasing insulin resistance, and the body will secrete more insulin. Insulin, in addition to regulating sugar metabolism, is also an important growth regulatory factor, which can promote significant proliferation of endometrial cells and increase the risk of EC [1, 2]. Therefore, it is necessary to conduct further research on the causal relationship between irregular diet and EC. |
| Salt added to food | Lifestyle | Liao et al. [3] found that a brief high-salt diet can cause epigenetic changes and generate continuous inflammatory activation through NF-κB and other signaling pathways, stimulating abnormal endometrial hyperplasia. However, the causal relationship involved is still unclear and requires further investigation. |
| Average weekly beer plus cider intake | Lifestyle | The influence of alcohol on the risk of EC has always been controversial. A meta-analysis found that alcohol is related to EC in a J-shaped relationship [4]. Drinking less than one cup per day can reduce the risk of EC, while more than two cups can increase the risk of EC. A prospective study involving 68,067 nurses found [5] that moderate drinking can reduce the risk of EC by 22%. Some studies also suggest [6] that alcohol has no relation to the onset of EC. Given the previous studies' conflicting results, this research explores the potential causal relationship from a genetic perspective. |
| Gastroesophageal reflux disease | Gastrointestinal diseases | Obesity is a clear risk factor for Gastroesophageal reflux disease (GERD) [7] and the strongest risk factor for ECEH [8]. Chronic esophageal inflammation caused by GERD itself may lead to a long-term low-level inflammatory state throughout the body [9]. This group of people may be more prone to EC, but the causal relationship among them deserves further investigation. |
| Ulcerative colitis | Gastrointestinal diseases | In EC, inflammation plays a more central and independent role, directly driving events such as TP53 mutations, leading to malignant transformation in a low-estrogen environment [10]. Therefore, for women with ulcerative colitis, they should be regarded as high-risk groups for both EC subtypes. However, there is a lack of causal relationship research from a genetic perspective. |
| Celiac disease | Gastrointestinal diseases | Celiac disease patients often experience chronic diarrhea, malnutrition, and weight loss. Given that obesity is a significant risk factor for ECEH (as adipose tissue produces estrogen through aromatase) [7]the genetic predisposition to celiac disease may lead to persistently lower circulating estrogen levels throughout life, thereby exerting a continuous protective effect. However, the protective causal relationship involved has not yet been studied. |
| Age first had sexual intercourse | Reproductive factors | During the sexual behavior process, oxytocin and estrogen are released, and the younger the age of first sexual intercourse, the earlier one is exposed to high levels of estrogen fluctuations. At the same time, early sexual behavior can affect the physical and mental health of teenagers and exacerbate endocrine disorders, leading to abnormal proliferation and apoptosis of the endometrium [11]. It may be more likely to cause endometrial cancer, but the causal relationship between them still needs to be studied. |
| Length of menstrual cycle | Reproductive factors | Previous epidemiological studies have found that irregular menstrual cycles are a high-risk factor for EC [12], but the potential causal relationship has not been explored. |
| Comparative body size at age 10 | Other factors | Obesity is a known high-risk factor for EC [13]. This study shifted the obesity-related risk window for EC from adulthood to childhood, indicating that obesity exposure in early life has its own independent carcinogenic potential. Children are a critical period for fat tissue development, and obesity at this stage leads to an irreversible increase in the number of fat cells, resulting in poorer metabolic health and a greater tendency towards obesity in adulthood. As a systemic chronic inflammatory state, childhood obesity means that the carcinogenic inflammatory environment has already been initiated, and there is a greater probability of developing EC. However, the causal relationship involved still needs to be studied. |
| Parental longevity (father's attained age) | Other factors | Previous studies have found that parental longevity can reduce the all-cause mortality risk of children [14]. At the same time, the offspring of long-lived parents have a lower cancer rate [15]. However, these studies are limited to observational studies. However, there is a lack of causal correlation studies from a genetic perspective. |
| Parental longevity (mother's attained age) | Other factors |

**Reference**

1. Hernandez, A.V., et al., *Insulin resistance and endometrial cancer risk: A systematic review and meta-analysis.* Eur J Cancer, 2015. 51(18): p. 2747-58.

2. Santos Fortes Dos Reis, V.M., et al., *Effects of Metformin Treatment Against Endometrial Cancer Cells Cultured In Vitro or Grafted into Female Balb/C Nude Mice: Insights into Cell Response and IGF-1R and PI3K/AKT/mTOR Signaling Pathways.* Cell Biochem Biophys, 2025.

3. Liao, Y., et al., *Transient high salt intake causes epigenetic changes and leads to persistent inflammatory activation to produce "salt memory".* J Nutr Biochem, 2023. 115: p. 109281.

4. Friberg, E., et al., *Alcohol intake and endometrial cancer risk: a meta-analysis of prospective studies.* Br J Cancer, 2010. 103(1): p. 127-31.

5. Je, Y., I. De Vivo, and E. Giovannucci, *Long-term alcohol intake and risk of endometrial cancer in the Nurses' Health Study, 1980-2010.* Br J Cancer, 2014. 111(1): p. 186-94.

6. Zhou, Q., et al., *Does alcohol consumption modify the risk of endometrial cancer? A dose-response meta-analysis of prospective studies.* Arch Gynecol Obstet, 2017. 295(2): p. 467-479.

7. Liu, X., et al., *Sex-specific association of visceral and abdominal subcutaneous adipose tissue with gastroesophageal reflux disease: a large-scale perspective cohort study.* BMC Gastroenterol, 2025. 25(1): p. 635.

8. Guo, C., et al., *Novel Metabolic-Prognostic Integration Reveals TCF21-Mediated Mitochondrial Regulation in Endometrial Cancer.* Mol Carcinog, 2025. 64(12): p. 1981-1999.

9. Altomare, A., et al., *Gastroesophageal reflux disease: Update on inflammation and symptom perception.* World J Gastroenterol, 2013. 19(39): p. 6523-8.

10. Stodden, G.R., et al., *Loss of Cdh1 and Trp53 in the uterus induces chronic inflammation with modification of tumor microenvironment.* Oncogene, 2015. 34(19): p. 2471-82.

11. Lara, L.A.S. and C.H.N. Abdo, *Age at Time of Initial Sexual Intercourse and Health of Adolescent Girls.* J Pediatr Adolesc Gynecol, 2016. 29(5): p. 417-423.

12. Wang, S., et al., *Menstrual cycle characteristics and incident cancer: a prospective cohort study.* Hum Reprod, 2022. 37(2): p. 341-351.

13. Hazelwood, E., et al., *Identifying molecular mediators of the relationship between body mass index and endometrial cancer risk: a Mendelian randomization analysis.* BMC Med, 2022. 20(1): p. 125.

14. Thalén, A. and A. Ledberg, *Consequences of heterogeneity in aging: parental age at death predicts midlife all-cause mortality and hospitalization in a Swedish national birth cohort.* BMC Geriatr, 2024. 24(1): p. 207.

15. Del Risco Kollerud, R., et al., *The risk of cancer in the offspring and parental length of life.* Cancer Epidemiol, 2017. 48: p. 8-15.
