# Supplementary material for: Causal effects of multiple exposures on endometrial cancer and its subtypes: A two-sample Mendelian randomized study
Source: Research Square preprint supplement (doi:10.21203/rs.3.rs-8340876/v1), 2026-01-16
Supplement: Supplementary file 4 [file 8bfb1ecfd0220b9088f1c289.xlsx]

## Sheet: Sheet1
	id.exposure	id.outcome	outcome	exposure	method	nsnp	b	se	pval	lo_ci	up_ci	or	or_lci95	or_uci95
1	Variation in diet	Endometrial cancer	ebi-a-GCST006464	Variation in diet || id:ukb-b-2909	MR Egger	15	4.51191	5.19523	0.400886	-5.67075	14.6946	91.0955	0.0034453	2.40862e+06
2	Variation in diet	Endometrial cancer	ebi-a-GCST006464	Variation in diet || id:ukb-b-2909	Weighted median	15	1.67278	0.756731	0.0270682	0.189586	3.15597	5.32695	1.20875	23.4758
3	Variation in diet	Endometrial cancer	ebi-a-GCST006464	Variation in diet || id:ukb-b-2909	Inverse variance weighted	15	1.19537	0.643725	0.0633178	-0.0663336	2.45707	3.30477	0.935819	11.6705
4	Variation in diet	Endometrial cancer	ebi-a-GCST006464	Variation in diet || id:ukb-b-2909	Simple mode	15	1.55537	1.30014	0.251445	-0.992913	4.10365	4.73683	0.370496	60.561
5	Variation in diet	Endometrial cancer	ebi-a-GCST006464	Variation in diet || id:ukb-b-2909	Weighted mode	15	1.48477	1.21021	0.240105	-0.88724	3.85678	4.41395	0.411791	47.3127
6	Variation in diet	Endometrial cancer	ebi-a-GCST006464	Variation in diet || id:ukb-b-2909	Robust adjusted profile score (RAPS)	15	1.25538	0.611899	0.0402075	0.0560567	2.4547	3.50917	1.05766	11.643
	id.exposure	id.outcome	outcome	exposure	method	nsnp	b	se	pval	lo_ci	up_ci	or	or_lci95	or_uci95
1	Salt added to food	Endometrial cancer	ebi-a-GCST006464	Salt added to food || id:ukb-b-8121	MR Egger	103	0.0363382	0.488598	0.940861	-0.921315	0.993991	1.03701	0.397995	2.702
2	Salt added to food	Endometrial cancer	ebi-a-GCST006464	Salt added to food || id:ukb-b-8121	Weighted median	103	0.147587	0.192591	0.443483	-0.229891	0.525065	1.15903	0.79462	1.69057
3	Salt added to food	Endometrial cancer	ebi-a-GCST006464	Salt added to food || id:ukb-b-8121	Inverse variance weighted	103	0.299343	0.147304	0.0421386	0.0106277	0.588058	1.34897	1.01068	1.80049
4	Salt added to food	Endometrial cancer	ebi-a-GCST006464	Salt added to food || id:ukb-b-8121	Simple mode	103	0.292655	0.486456	0.548771	-0.660799	1.24611	1.33998	0.516439	3.47679
5	Salt added to food	Endometrial cancer	ebi-a-GCST006464	Salt added to food || id:ukb-b-8121	Weighted mode	103	0.0139397	0.425749	0.973945	-0.820527	0.848407	1.01404	0.440199	2.33592
6	Salt added to food	Endometrial cancer	ebi-a-GCST006464	Salt added to food || id:ukb-b-8121	Robust adjusted profile score (RAPS)	103	0.341848	0.152872	0.0253403	0.0422194	0.641476	1.40755	1.04312	1.89928
	id.exposure	id.outcome	outcome	exposure	method	nsnp	b	se	pval	lo_ci	up_ci	or	or_lci95	or_uci95
1	Average weekly beer plus cider intake	Endometrial cancer	ebi-a-GCST006464	Average weekly beer plus cider intake || id:ukb-b-5174	MR Egger	20	-2.68738	1.10845	0.0260819	-4.85993	-0.514827	0.068059	0.00775099	0.597604
2	Average weekly beer plus cider intake	Endometrial cancer	ebi-a-GCST006464	Average weekly beer plus cider intake || id:ukb-b-5174	Weighted median	20	-0.684358	0.461804	0.138361	-1.58949	0.220778	0.504414	0.204029	1.24705
3	Average weekly beer plus cider intake	Endometrial cancer	ebi-a-GCST006464	Average weekly beer plus cider intake || id:ukb-b-5174	Inverse variance weighted	20	-0.899148	0.354388	0.0111748	-1.59375	-0.204548	0.406916	0.203162	0.815016
4	Average weekly beer plus cider intake	Endometrial cancer	ebi-a-GCST006464	Average weekly beer plus cider intake || id:ukb-b-5174	Simple mode	20	0.196159	0.977353	0.843062	-1.71945	2.11177	1.21672	0.179164	8.26286
5	Average weekly beer plus cider intake	Endometrial cancer	ebi-a-GCST006464	Average weekly beer plus cider intake || id:ukb-b-5174	Weighted mode	20	0.174817	0.978532	0.860102	-1.74311	2.09274	1.19103	0.174976	8.1071
6	Average weekly beer plus cider intake	Endometrial cancer	ebi-a-GCST006464	Average weekly beer plus cider intake || id:ukb-b-5174	Robust adjusted profile score (RAPS)	20	-0.861496	0.355327	0.0153289	-1.55794	-0.165055	0.42253	0.21057	0.847847
	id.exposure	id.outcome	outcome	exposure	method	nsnp	b	se	pval	lo_ci	up_ci	or	or_lci95	or_uci95
1	Gastroesophageal reflux disease	Endometrial cancer	ebi-a-GCST006464	Gastroesophageal reflux disease || id:ebi-a-GCST90000514	MR Egger	77	0.386218	0.342771	0.263439	-0.285613	1.05805	1.4714	0.751554	2.88074
2	Gastroesophageal reflux disease	Endometrial cancer	ebi-a-GCST006464	Gastroesophageal reflux disease || id:ebi-a-GCST90000514	Weighted median	77	0.163614	0.0856882	0.056209	-0.00433482	0.331563	1.17776	0.995675	1.39314
3	Gastroesophageal reflux disease	Endometrial cancer	ebi-a-GCST006464	Gastroesophageal reflux disease || id:ebi-a-GCST90000514	Inverse variance weighted	77	0.172468	0.060566	0.0044049	0.0537589	0.291178	1.18823	1.05523	1.338
4	Gastroesophageal reflux disease	Endometrial cancer	ebi-a-GCST006464	Gastroesophageal reflux disease || id:ebi-a-GCST90000514	Simple mode	77	0.197481	0.200038	0.32667	-0.194594	0.589555	1.21833	0.823169	1.80319
5	Gastroesophageal reflux disease	Endometrial cancer	ebi-a-GCST006464	Gastroesophageal reflux disease || id:ebi-a-GCST90000514	Weighted mode	77	0.190326	0.188427	0.315663	-0.178991	0.559644	1.20964	0.836113	1.75005
6	Gastroesophageal reflux disease	Endometrial cancer	ebi-a-GCST006464	Gastroesophageal reflux disease || id:ebi-a-GCST90000514	Robust adjusted profile score (RAPS)	77	0.14824	0.063031	0.0186797	0.0246994	0.271781	1.15979	1.02501	1.3123
	id.exposure	id.outcome	outcome	exposure	method	nsnp	b	se	pval	lo_ci	up_ci	or	or_lci95	or_uci95
1	Ulcerative colitis	Endometrial cancer	ebi-a-GCST006464	Ulcerative colitis || id:ieu-a-973	MR Egger	80	0.0477671	0.0254483	0.0642542	-0.00211163	0.0976458	1.04893	0.997891	1.10257
2	Ulcerative colitis	Endometrial cancer	ebi-a-GCST006464	Ulcerative colitis || id:ieu-a-973	Weighted median	80	0.0385087	0.0185097	0.037484	0.00222956	0.0747878	1.03926	1.00223	1.07766
3	Ulcerative colitis	Endometrial cancer	ebi-a-GCST006464	Ulcerative colitis || id:ieu-a-973	Inverse variance weighted	80	0.0317253	0.0120565	0.00850387	0.0080945	0.055356	1.03223	1.00813	1.05692
4	Ulcerative colitis	Endometrial cancer	ebi-a-GCST006464	Ulcerative colitis || id:ieu-a-973	Simple mode	80	0.059762	0.0461227	0.198846	-0.0306385	0.150162	1.06158	0.969826	1.16202
5	Ulcerative colitis	Endometrial cancer	ebi-a-GCST006464	Ulcerative colitis || id:ieu-a-973	Weighted mode	80	0.0359303	0.0351558	0.309886	-0.0329751	0.104836	1.03658	0.967563	1.11053
6	Ulcerative colitis	Endometrial cancer	ebi-a-GCST006464	Ulcerative colitis || id:ieu-a-973	Robust adjusted profile score (RAPS)	80	0.0364473	0.0126034	0.00382962	0.0117447	0.06115	1.03712	1.01181	1.06306
	id.exposure	id.outcome	outcome	exposure	method	nsnp	b	se	pval	lo_ci	up_ci	or	or_lci95	or_uci95
1	Celiac disease	Endometrial cancer	ebi-a-GCST006464	Celiac disease || id:ebi-a-GCST005523	MR Egger	37	-0.0473654	0.0201339	0.0243985	-0.0868279	-0.00790291	0.953739	0.916835	0.992128
2	Celiac disease	Endometrial cancer	ebi-a-GCST006464	Celiac disease || id:ebi-a-GCST005523	Weighted median	37	-0.0253095	0.0152753	0.0975423	-0.0552491	0.00463015	0.975008	0.946249	1.00464
3	Celiac disease	Endometrial cancer	ebi-a-GCST006464	Celiac disease || id:ebi-a-GCST005523	Inverse variance weighted	37	-0.0365815	0.0130199	0.00495933	-0.0621004	-0.0110625	0.96408	0.939788	0.988998
4	Celiac disease	Endometrial cancer	ebi-a-GCST006464	Celiac disease || id:ebi-a-GCST005523	Simple mode	37	-0.0193735	0.0388076	0.620661	-0.0954364	0.0566893	0.980813	0.908976	1.05833
5	Celiac disease	Endometrial cancer	ebi-a-GCST006464	Celiac disease || id:ebi-a-GCST005523	Weighted mode	37	-0.0389668	0.0126708	0.00399978	-0.0638015	-0.0141321	0.961783	0.938191	0.985967
6	Celiac disease	Endometrial cancer	ebi-a-GCST006464	Celiac disease || id:ebi-a-GCST005523	Robust adjusted profile score (RAPS)	37	-0.0360038	0.0131042	0.0060051	-0.061688	-0.0103196	0.964637	0.940176	0.989733
	id.exposure	id.outcome	outcome	exposure	method	nsnp	b	se	pval	lo_ci	up_ci	or	or_lci95	or_uci95
1	Age first had sexual intercourse	Endometrial cancer	ebi-a-GCST006464	Age first had sexual intercourse || id:ukb-b-6591	MR Egger	189	-0.147954	0.367257	0.687509	-0.867778	0.57187	0.862471	0.419884	1.77158
2	Age first had sexual intercourse	Endometrial cancer	ebi-a-GCST006464	Age first had sexual intercourse || id:ukb-b-6591	Weighted median	189	-0.13752	0.118774	0.246934	-0.370316	0.0952771	0.871517	0.690516	1.09996
3	Age first had sexual intercourse	Endometrial cancer	ebi-a-GCST006464	Age first had sexual intercourse || id:ukb-b-6591	Inverse variance weighted	189	-0.21389	0.0806345	0.00798775	-0.371934	-0.0558464	0.807437	0.6894	0.945684
4	Age first had sexual intercourse	Endometrial cancer	ebi-a-GCST006464	Age first had sexual intercourse || id:ukb-b-6591	Simple mode	189	0.112923	0.349705	0.747123	-0.572499	0.798345	1.11955	0.564114	2.22186
5	Age first had sexual intercourse	Endometrial cancer	ebi-a-GCST006464	Age first had sexual intercourse || id:ukb-b-6591	Weighted mode	189	0.112923	0.298087	0.705245	-0.471328	0.697174	1.11955	0.624173	2.00807
6	Age first had sexual intercourse	Endometrial cancer	ebi-a-GCST006464	Age first had sexual intercourse || id:ukb-b-6591	Robust adjusted profile score (RAPS)	190	-0.209872	0.0840599	0.0125358	-0.374629	-0.0451142	0.810688	0.687544	0.955888
	id.exposure	id.outcome	outcome	exposure	method	nsnp	b	se	pval	lo_ci	up_ci	or	or_lci95	or_uci95
1	Length of menstrual cycle	Endometrial cancer	ebi-a-GCST006464	Length of menstrual cycle || id:ukb-a-351	MR Egger	6	-0.300377	0.284761	0.350997	-0.858508	0.257754	0.740539	0.423794	1.29402
2	Length of menstrual cycle	Endometrial cancer	ebi-a-GCST006464	Length of menstrual cycle || id:ukb-a-351	Weighted median	6	-0.240194	0.134656	0.0744627	-0.504119	0.0237318	0.786475	0.604037	1.02402
3	Length of menstrual cycle	Endometrial cancer	ebi-a-GCST006464	Length of menstrual cycle || id:ukb-a-351	Inverse variance weighted	6	-0.230479	0.112534	0.0405521	-0.451046	-0.00991208	0.794153	0.636962	0.990137
4	Length of menstrual cycle	Endometrial cancer	ebi-a-GCST006464	Length of menstrual cycle || id:ukb-a-351	Simple mode	6	-0.181887	0.215627	0.437417	-0.604515	0.240742	0.833696	0.546339	1.27219
5	Length of menstrual cycle	Endometrial cancer	ebi-a-GCST006464	Length of menstrual cycle || id:ukb-a-351	Weighted mode	6	-0.248742	0.159661	0.179983	-0.561677	0.0641927	0.779781	0.570252	1.0663
6	Length of menstrual cycle	Endometrial cancer	ebi-a-GCST006464	Length of menstrual cycle || id:ukb-a-351	Robust adjusted profile score (RAPS)	6	-0.226183	0.120433	0.0603709	-0.462232	0.00986648	0.797572	0.629876	1.00992
	Length of menstrual cycle	Endometrial cancer	ebi-a-GCST006464	Length of menstrual cycle || id:ukb-a-351	method	nsnp	b	se	pval	lo_ci	up_ci	or	or_lci95	or_uci95
1	Comparative body size at age 10	Endometrial cancer	ebi-a-GCST006464	Comparative body size at age 10 || id:ukb-a-34	MR Egger	155	1.02699	0.229537	1.49e-05	0.577095	1.47688	2.79264	1.78086	4.37926
2	Comparative body size at age 10	Endometrial cancer	ebi-a-GCST006464	Comparative body size at age 10 || id:ukb-a-34	Weighted median	155	0.801143	0.152109	1.39e-07	0.503008	1.09928	2.22809	1.65369	3.00199
3	Comparative body size at age 10	Endometrial cancer	ebi-a-GCST006464	Comparative body size at age 10 || id:ukb-a-34	Inverse variance weighted	155	0.673716	0.10482	1.3e-10	0.468268	0.879164	1.96151	1.59723	2.40889
4	Comparative body size at age 10	Endometrial cancer	ebi-a-GCST006464	Comparative body size at age 10 || id:ukb-a-34	Simple mode	155	0.832472	0.369631	0.0257253	0.107995	1.55695	2.29899	1.11404	4.74432
5	Comparative body size at age 10	Endometrial cancer	ebi-a-GCST006464	Comparative body size at age 10 || id:ukb-a-34	Weighted mode	155	0.765275	0.213645	0.000456763	0.34653	1.18402	2.14959	1.41415	3.26748
6	Comparative body size at age 10	Endometrial cancer	ebi-a-GCST006464	Comparative body size at age 10 || id:ukb-a-34	Robust adjusted profile score (RAPS)	155	0.68977	0.106568	9.63559e-11	0.480896	0.898644	1.99326	1.61752	2.45627
	id.exposure	id.outcome	outcome	exposure	method	nsnp	b	se	pval	lo_ci	up_ci	or	or_lci95	or_uci95
1	Parental longevity (father's attained age)	Endometrial cancer	ebi-a-GCST006464	Parental longevity (father's attained age) || id:ebi-a-GCST006701	MR Egger	13	-1.29404	0.95932	0.204479	-3.1743	0.586231	0.274162	0.0418232	1.7972
2	Parental longevity (father's attained age)	Endometrial cancer	ebi-a-GCST006464	Parental longevity (father's attained age) || id:ebi-a-GCST006701	Weighted median	13	-0.199563	0.427504	0.640637	-1.03747	0.638346	0.819089	0.354349	1.89335
3	Parental longevity (father's attained age)	Endometrial cancer	ebi-a-GCST006464	Parental longevity (father's attained age) || id:ebi-a-GCST006701	Inverse variance weighted	13	-0.651538	0.356084	0.0672897	-1.34946	0.0463855	0.521243	0.25938	1.04748
4	Parental longevity (father's attained age)	Endometrial cancer	ebi-a-GCST006464	Parental longevity (father's attained age) || id:ebi-a-GCST006701	Simple mode	13	0.287455	0.751302	0.708701	-1.1851	1.76001	1.33303	0.305716	5.81248
5	Parental longevity (father's attained age)	Endometrial cancer	ebi-a-GCST006464	Parental longevity (father's attained age) || id:ebi-a-GCST006701	Weighted mode	13	0.032322	0.657234	0.961586	-1.25586	1.3205	1.03285	0.284832	3.74529
6	Parental longevity (father's attained age)	Endometrial cancer	ebi-a-GCST006464	Parental longevity (father's attained age) || id:ebi-a-GCST006701	Robust adjusted profile score (RAPS)	13	-0.646942	0.383837	0.0919001	-1.39926	0.105379	0.523645	0.246779	1.11113
	id.exposure	id.outcome	outcome	exposure	method	nsnp	b	se	pval	lo_ci	up_ci	or	or_lci95	or_uci95
1	Parental longevity (mother's attained age)	Endometrial cancer	ebi-a-GCST006464	Parental longevity (mother's attained age) || id:ebi-a-GCST006696	MR Egger	4	-0.578404	1.21894	0.681896	-2.96752	1.81071	0.560792	0.0514306	6.11481
2	Parental longevity (mother's attained age)	Endometrial cancer	ebi-a-GCST006464	Parental longevity (mother's attained age) || id:ebi-a-GCST006696	Weighted median	4	-1.38788	0.40765	0.000662621	-2.18688	-0.588889	0.249603	0.112267	0.554943
3	Parental longevity (mother's attained age)	Endometrial cancer	ebi-a-GCST006464	Parental longevity (mother's attained age) || id:ebi-a-GCST006696	Inverse variance weighted	4	-1.39362	0.541923	0.0101221	-2.45579	-0.331457	0.248174	0.0857951	0.717877
4	Parental longevity (mother's attained age)	Endometrial cancer	ebi-a-GCST006464	Parental longevity (mother's attained age) || id:ebi-a-GCST006696	Simple mode	4	-2.36925	0.910378	0.0802032	-4.15359	-0.584908	0.093551	0.0157079	0.557157
5	Parental longevity (mother's attained age)	Endometrial cancer	ebi-a-GCST006464	Parental longevity (mother's attained age) || id:ebi-a-GCST006696	Weighted mode	4	-1.35924	0.442687	0.0545441	-2.2269	-0.491571	0.256857	0.107862	0.611665
6	Parental longevity (mother's attained age)	Endometrial cancer	ebi-a-GCST006464	Parental longevity (mother's attained age) || id:ebi-a-GCST006696	Robust adjusted profile score (RAPS)	4	-1.34169	0.526133	0.0107694	-2.37291	-0.310468	0.261404	0.0932093	0.733104
	id.exposure	id.outcome	outcome	exposure	method	nsnp	b	se	pval	lo_ci	up_ci	or	or_lci95	or_uci95
1	Variation in diet	Endometrial cancer (endometrioid histology)	ebi-a-GCST006465	Variation in diet || id:ukb-b-2909	MR Egger	15	5.35694	6.56153	0.428969	-7.50366	18.2175	212.076	0.000551065	8.16169e+07
2	Variation in diet	Endometrial cancer (endometrioid histology)	ebi-a-GCST006465	Variation in diet || id:ukb-b-2909	Weighted median	15	2.43031	0.886693	0.00612756	0.692397	4.16823	11.3625	1.9985	64.6012
3	Variation in diet	Endometrial cancer (endometrioid histology)	ebi-a-GCST006465	Variation in diet || id:ukb-b-2909	Inverse variance weighted	15	1.8358	0.809281	0.0233027	0.249611	3.42199	6.27016	1.28353	30.6304
4	Variation in diet	Endometrial cancer (endometrioid histology)	ebi-a-GCST006465	Variation in diet || id:ukb-b-2909	Simple mode	15	3.1585	1.63916	0.0745368	-0.0542629	6.37126	23.5353	0.947183	584.796
5	Variation in diet	Endometrial cancer (endometrioid histology)	ebi-a-GCST006465	Variation in diet || id:ukb-b-2909	Weighted mode	15	3.05446	1.64735	0.0849001	-0.174341	6.28327	21.2098	0.840011	535.535
6	Variation in diet	Endometrial cancer (endometrioid histology)	ebi-a-GCST006465	Variation in diet || id:ukb-b-2909	Robust adjusted profile score (RAPS)	15	1.75703	0.843104	0.0371603	0.104544	3.40951	5.79519	1.1102	30.2505
	id.exposure	id.outcome	outcome	exposure	method	nsnp	b	se	pval	lo_ci	up_ci	or	or_lci95	or_uci95
1	Salt added to food	Endometrial cancer (endometrioid histology)	ebi-a-GCST006465	Salt added to food || id:ukb-b-8121	MR Egger	103	0.21688	0.567388	0.703084	-0.8952	1.32896	1.2422	0.408526	3.77711
2	Salt added to food	Endometrial cancer (endometrioid histology)	ebi-a-GCST006465	Salt added to food || id:ukb-b-8121	Weighted median	103	0.394004	0.221179	0.0748499	-0.0395063	0.827515	1.48291	0.961264	2.28763
3	Salt added to food	Endometrial cancer (endometrioid histology)	ebi-a-GCST006465	Salt added to food || id:ukb-b-8121	Inverse variance weighted	103	0.335393	0.171048	0.0499016	0.000138009	0.670647	1.39849	1.00014	1.9555
4	Salt added to food	Endometrial cancer (endometrioid histology)	ebi-a-GCST006465	Salt added to food || id:ukb-b-8121	Simple mode	103	0.952685	0.666791	0.156128	-0.354225	2.25959	2.59266	0.701717	9.5792
5	Salt added to food	Endometrial cancer (endometrioid histology)	ebi-a-GCST006465	Salt added to food || id:ukb-b-8121	Weighted mode	103	0.844479	0.518126	0.106213	-0.171048	1.86001	2.32677	0.842781	6.42378
6	Salt added to food	Endometrial cancer (endometrioid histology)	ebi-a-GCST006465	Salt added to food || id:ukb-b-8121	Robust adjusted profile score (RAPS)	103	0.36944	0.179226	0.039273	0.0181582	0.720723	1.44692	1.01832	2.05592
	id.exposure	id.outcome	outcome	exposure	method	nsnp	b	se	pval	lo_ci	up_ci	or	or_lci95	or_uci95
1	Average weekly beer plus cider intake	Endometrial cancer (endometrioid histology)	ebi-a-GCST006465	Average weekly beer plus cider intake || id:ukb-b-5174	MR Egger	20	-3.05776	1.37207	0.0388274	-5.74702	-0.368514	0.0469926	0.00319229	0.691762
2	Average weekly beer plus cider intake	Endometrial cancer (endometrioid histology)	ebi-a-GCST006465	Average weekly beer plus cider intake || id:ukb-b-5174	Weighted median	20	-0.950541	0.561393	0.0904208	-2.05087	0.14979	0.386532	0.128623	1.16159
3	Average weekly beer plus cider intake	Endometrial cancer (endometrioid histology)	ebi-a-GCST006465	Average weekly beer plus cider intake || id:ukb-b-5174	Inverse variance weighted	20	-0.931108	0.435339	0.0324511	-1.78437	-0.0778426	0.394117	0.167902	0.92511
4	Average weekly beer plus cider intake	Endometrial cancer (endometrioid histology)	ebi-a-GCST006465	Average weekly beer plus cider intake || id:ukb-b-5174	Simple mode	20	0.881544	1.29796	0.505217	-1.66246	3.42555	2.41462	0.189672	30.7395
5	Average weekly beer plus cider intake	Endometrial cancer (endometrioid histology)	ebi-a-GCST006465	Average weekly beer plus cider intake || id:ukb-b-5174	Weighted mode	20	0.859576	1.31462	0.521038	-1.71707	3.43623	2.36216	0.179591	31.0695
6	Average weekly beer plus cider intake	Endometrial cancer (endometrioid histology)	ebi-a-GCST006465	Average weekly beer plus cider intake || id:ukb-b-5174	Robust adjusted profile score (RAPS)	20	-0.942973	0.463669	0.0419801	-1.85176	-0.0341805	0.389468	0.15696	0.966397
	id.exposure	id.outcome	outcome	exposure	method	nsnp	b	se	pval	lo_ci	up_ci	or	or_lci95	or_uci95
1	Usual walking pace	Endometrial cancer (endometrioid histology)	ebi-a-GCST006465	Usual walking pace || id:ukb-a-513	MR Egger	28	0.985671	1.88089	0.604687	-2.70088	4.67222	2.67961	0.0671466	106.935
2	Usual walking pace	Endometrial cancer (endometrioid histology)	ebi-a-GCST006465	Usual walking pace || id:ukb-a-513	Weighted median	28	-1.48139	0.555562	0.00766537	-2.57029	-0.392485	0.227322	0.0765136	0.675377
3	Usual walking pace	Endometrial cancer (endometrioid histology)	ebi-a-GCST006465	Usual walking pace || id:ukb-a-513	Inverse variance weighted	28	-1.09053	0.409349	0.00772043	-1.89286	-0.288206	0.336038	0.150641	0.749607
4	Usual walking pace	Endometrial cancer (endometrioid histology)	ebi-a-GCST006465	Usual walking pace || id:ukb-a-513	Simple mode	28	-2.00962	1.21771	0.110464	-4.39634	0.377099	0.13404	0.0123224	1.45805
5	Usual walking pace	Endometrial cancer (endometrioid histology)	ebi-a-GCST006465	Usual walking pace || id:ukb-a-513	Weighted mode	28	-1.92374	1.24797	0.134836	-4.36976	0.522278	0.146059	0.0126542	1.68586
	Usual walking pace	Endometrial cancer (endometrioid histology)	ebi-a-GCST006465	Usual walking pace || id:ukb-a-513	Robust adjusted profile score (RAPS)	28	-1.14573	0.419115	0.00626285	-1.9672	-0.324266	0.317991	0.139848	0.723058
	id.exposure	id.outcome	outcome	exposure	method	nsnp	b	se	pval	lo_ci	up_ci	or	or_lci95	or_uci95
1	Gastroesophageal reflux disease	Endometrial cancer (endometrioid histology)	ebi-a-GCST006465	Gastroesophageal reflux disease || id:ebi-a-GCST90000514	MR Egger	77	0.54692	0.400338	0.175975	-0.237742	1.33158	1.72792	0.788406	3.78703
2	Gastroesophageal reflux disease	Endometrial cancer (endometrioid histology)	ebi-a-GCST006465	Gastroesophageal reflux disease || id:ebi-a-GCST90000514	Weighted median	77	0.347979	0.0998947	0.000494976	0.152186	0.543773	1.4162	1.16438	1.72249
3	Gastroesophageal reflux disease	Endometrial cancer (endometrioid histology)	ebi-a-GCST006465	Gastroesophageal reflux disease || id:ebi-a-GCST90000514	Inverse variance weighted	77	0.313942	0.0705917	8.7e-06	0.175582	0.452301	1.36881	1.19194	1.57193
4	Gastroesophageal reflux disease	Endometrial cancer (endometrioid histology)	ebi-a-GCST006465	Gastroesophageal reflux disease || id:ebi-a-GCST90000514	Simple mode	77	0.49714	0.250485	0.0507861	0.00618955	0.98809	1.64401	1.00621	2.6861
5	Gastroesophageal reflux disease	Endometrial cancer (endometrioid histology)	ebi-a-GCST006465	Gastroesophageal reflux disease || id:ebi-a-GCST90000514	Weighted mode	77	0.480485	0.227842	0.038252	0.033914	0.927055	1.61686	1.0345	2.52706
6	Gastroesophageal reflux disease	Endometrial cancer (endometrioid histology)	ebi-a-GCST006465	Gastroesophageal reflux disease || id:ebi-a-GCST90000514	Robust adjusted profile score (RAPS)	28	-1.14573	0.419115	0.00626285	-1.9672	-0.324266	0.317991	0.139848	0.723058
	id.exposure	id.outcome	outcome	exposure	method	nsnp	b	se	pval	lo_ci	up_ci	or	or_lci95	or_uci95
1	Ulcerative colitis	Endometrial cancer (endometrioid histology)	ebi-a-GCST006465	Ulcerative colitis || id:ieu-a-973	MR Egger	80	0.0670367	0.029981	0.028212	0.00827387	0.1258	1.06933	1.00831	1.13405
2	Ulcerative colitis	Endometrial cancer (endometrioid histology)	ebi-a-GCST006465	Ulcerative colitis || id:ieu-a-973	Weighted median	80	0.0289699	0.021163	0.171032	-0.0125096	0.0704493	1.02939	0.987568	1.07299
3	Ulcerative colitis	Endometrial cancer (endometrioid histology)	ebi-a-GCST006465	Ulcerative colitis || id:ieu-a-973	Inverse variance weighted	80	0.0359026	0.0142378	0.0116811	0.00799643	0.0638087	1.03655	1.00803	1.06589
4	Ulcerative colitis	Endometrial cancer (endometrioid histology)	ebi-a-GCST006465	Ulcerative colitis || id:ieu-a-973	Simple mode	80	0.0221779	0.0501319	0.659416	-0.0760807	0.120436	1.02243	0.926741	1.12799
5	Ulcerative colitis	Endometrial cancer (endometrioid histology)	ebi-a-GCST006465	Ulcerative colitis || id:ieu-a-973	Weighted mode	80	-0.00940275	0.0418144	0.822662	-0.091359	0.0725535	0.990641	0.91269	1.07525
6	Ulcerative colitis	Endometrial cancer (endometrioid histology)	ebi-a-GCST006465	Ulcerative colitis || id:ieu-a-973	Robust adjusted profile score (RAPS)	80	0.0332314	0.0149087	0.0258149	0.00401022	0.0624525	1.03379	1.00402	1.06444
	id.exposure	id.outcome	outcome	exposure	method	nsnp	b	se	pval	lo_ci	up_ci	or	or_lci95	or_uci95
1	Celiac disease	Endometrial cancer (endometrioid histology)	ebi-a-GCST006465	Celiac disease || id:ebi-a-GCST005523	MR Egger	37	-0.0489165	0.022762	0.0386273	-0.0935301	-0.0043029	0.952261	0.910711	0.995706
2	Celiac disease	Endometrial cancer (endometrioid histology)	ebi-a-GCST006465	Celiac disease || id:ebi-a-GCST005523	Weighted median	37	-0.0306919	0.0176937	0.0828076	-0.0653716	0.00398776	0.969774	0.936719	1.004
3	Celiac disease	Endometrial cancer (endometrioid histology)	ebi-a-GCST006465	Celiac disease || id:ebi-a-GCST005523	Inverse variance weighted	37	-0.049358	0.0146054	0.000726375	-0.0779847	-0.0207313	0.95184	0.924979	0.979482
4	Celiac disease	Endometrial cancer (endometrioid histology)	ebi-a-GCST006465	Celiac disease || id:ebi-a-GCST005523	Simple mode	37	-0.0231028	0.0413938	0.580216	-0.104235	0.0580291	0.977162	0.901014	1.05975
5	Celiac disease	Endometrial cancer (endometrioid histology)	ebi-a-GCST006465	Celiac disease || id:ebi-a-GCST005523	Weighted mode	37	-0.036744	0.0176565	0.0446039	-0.0713508	-0.00213716	0.963923	0.931135	0.997865
6	Celiac disease	Endometrial cancer (endometrioid histology)	ebi-a-GCST006465	Celiac disease || id:ebi-a-GCST005523	Robust adjusted profile score (RAPS)	37	-0.0462008	0.0143201	0.0012541	-0.0742682	-0.0181333	0.95485	0.928423	0.98203
	id.exposure	id.outcome	outcome	exposure	method	nsnp	b	se	pval	lo_ci	up_ci	or	or_lci95	or_uci95
1	Age first had sexual intercourse	Endometrial cancer (endometrioid histology)	ebi-a-GCST006465	Age first had sexual intercourse || id:ukb-b-6591	MR Egger	190	-0.248559	0.449187	0.580679	-1.12897	0.631848	0.779924	0.323368	1.88108
2	Age first had sexual intercourse	Endometrial cancer (endometrioid histology)	ebi-a-GCST006465	Age first had sexual intercourse || id:ukb-b-6591	Weighted median	190	-0.247413	0.136756	0.0704265	-0.515454	0.0206286	0.780818	0.597229	1.02084
3	Age first had sexual intercourse	Endometrial cancer (endometrioid histology)	ebi-a-GCST006465	Age first had sexual intercourse || id:ukb-b-6591	Inverse variance weighted	190	-0.296772	0.0985859	0.00260996	-0.490001	-0.103544	0.743213	0.612626	0.901636
4	Age first had sexual intercourse	Endometrial cancer (endometrioid histology)	ebi-a-GCST006465	Age first had sexual intercourse || id:ukb-b-6591	Simple mode	190	0.079313	0.459998	0.863292	-0.822283	0.980909	1.08254	0.439427	2.66688
5	Age first had sexual intercourse	Endometrial cancer (endometrioid histology)	ebi-a-GCST006465	Age first had sexual intercourse || id:ukb-b-6591	Weighted mode	190	-0.186191	0.394893	0.63783	-0.960181	0.5878	0.830115	0.382823	1.80002
6	Age first had sexual intercourse	Endometrial cancer (endometrioid histology)	ebi-a-GCST006465	Age first had sexual intercourse || id:ukb-b-6591	Robust adjusted profile score (RAPS)	190	-0.273035	0.102681	0.0078358	-0.47429	-0.0717806	0.761066	0.622327	0.930735
	id.exposure	id.outcome	outcome	exposure	method	nsnp	b	se	pval	lo_ci	up_ci	or	or_lci95	or_uci95
1	Length of menstrual cycle	Endometrial cancer (endometrioid histology)	ebi-a-GCST006465	Length of menstrual cycle || id:ukb-a-351	MR Egger	6	-0.408162	0.309771	0.258029	-1.01531	0.198988	0.664871	0.362289	1.22017
2	Length of menstrual cycle	Endometrial cancer (endometrioid histology)	ebi-a-GCST006465	Length of menstrual cycle || id:ukb-a-351	Weighted median	6	-0.390008	0.16381	0.0172728	-0.711076	-0.0689393	0.677052	0.491115	0.933383
3	Length of menstrual cycle	Endometrial cancer (endometrioid histology)	ebi-a-GCST006465	Length of menstrual cycle || id:ukb-a-351	Inverse variance weighted	6	-0.402922	0.133953	0.00263036	-0.66547	-0.140373	0.668364	0.514032	0.869034
4	Length of menstrual cycle	Endometrial cancer (endometrioid histology)	ebi-a-GCST006465	Length of menstrual cycle || id:ukb-a-351	Simple mode	6	-0.380667	0.241253	0.175423	-0.853523	0.0921883	0.683405	0.425912	1.09657
5	Length of menstrual cycle	Endometrial cancer (endometrioid histology)	ebi-a-GCST006465	Length of menstrual cycle || id:ukb-a-351	Weighted mode	6	-0.387664	0.17874	0.0822605	-0.737995	-0.0373331	0.67864	0.478071	0.963355
6	Length of menstrual cycle	Endometrial cancer (endometrioid histology)	ebi-a-GCST006465	Length of menstrual cycle || id:ukb-a-351	Robust adjusted profile score (RAPS)	6	-0.402994	0.140726	0.00418743	-0.678817	-0.127172	0.668316	0.507217	0.880582
	id.exposure	id.outcome	outcome	exposure	method	nsnp	b	se	pval	lo_ci	up_ci	or	or_lci95	or_uci95
1	Comparative body size at age 10	Endometrial cancer (endometrioid histology)	ebi-a-GCST006465	Comparative body size at age 10 || id:ukb-a-34	MR Egger	155	1.06471	0.269179	0.000116547	0.53712	1.5923	2.9	1.71107	4.91505
2	Comparative body size at age 10	Endometrial cancer (endometrioid histology)	ebi-a-GCST006465	Comparative body size at age 10 || id:ukb-a-34	Weighted median	155	0.837877	0.170671	9.14e-07	0.503362	1.17239	2.31146	1.65427	3.22971
3	Comparative body size at age 10	Endometrial cancer (endometrioid histology)	ebi-a-GCST006465	Comparative body size at age 10 || id:ukb-a-34	Inverse variance weighted	155	0.767262	0.122466	3.73e-10	0.527227	1.0073	2.15386	1.69423	2.73819
4	Comparative body size at age 10	Endometrial cancer (endometrioid histology)	ebi-a-GCST006465	Comparative body size at age 10 || id:ukb-a-34	Simple mode	155	0.910011	0.423862	0.0333623	0.0792427	1.74078	2.48435	1.08247	5.70179
5	Comparative body size at age 10	Endometrial cancer (endometrioid histology)	ebi-a-GCST006465	Comparative body size at age 10 || id:ukb-a-34	Weighted mode	155	0.803197	0.218325	0.000323257	0.37528	1.23111	2.23267	1.4554	3.42504
6	Comparative body size at age 10	Endometrial cancer (endometrioid histology)	ebi-a-GCST006465	Comparative body size at age 10 || id:ukb-a-34	Robust adjusted profile score (RAPS)	155	0.801154	0.128269	4.21456e-10	0.549746	1.05256	2.22811	1.73281	2.86498
	id.exposure	id.outcome	outcome	exposure	method	nsnp	b	se	pval	lo_ci	up_ci	or	or_lci95	or_uci95
1	Parental longevity (father's attained age)	Endometrial cancer (endometrioid histology)	ebi-a-GCST006465	Parental longevity (father's attained age) || id:ebi-a-GCST006701	MR Egger	13	-1.00915	1.00997	0.339175	-2.98869	0.970388	0.364528	0.0503531	2.63897
2	Parental longevity (father's attained age)	Endometrial cancer (endometrioid histology)	ebi-a-GCST006465	Parental longevity (father's attained age) || id:ebi-a-GCST006701	Weighted median	13	-0.420918	0.4638	0.36412	-1.32997	0.488129	0.656444	0.264486	1.62927
3	Parental longevity (father's attained age)	Endometrial cancer (endometrioid histology)	ebi-a-GCST006465	Parental longevity (father's attained age) || id:ebi-a-GCST006701	Inverse variance weighted	13	-0.806025	0.367029	0.0280861	-1.5254	-0.0866486	0.44663	0.217534	0.916999
4	Parental longevity (father's attained age)	Endometrial cancer (endometrioid histology)	ebi-a-GCST006465	Parental longevity (father's attained age) || id:ebi-a-GCST006701	Simple mode	13	-0.0363368	0.853601	0.966745	-1.7094	1.63672	0.964315	0.180975	5.1383
5	Parental longevity (father's attained age)	Endometrial cancer (endometrioid histology)	ebi-a-GCST006465	Parental longevity (father's attained age) || id:ebi-a-GCST006701	Weighted mode	13	-0.191566	0.712236	0.792526	-1.58755	1.20442	0.825665	0.204426	3.33481
6	Parental longevity (father's attained age)	Endometrial cancer (endometrioid histology)	ebi-a-GCST006465	Parental longevity (father's attained age) || id:ebi-a-GCST006701	Robust adjusted profile score (RAPS)	13	-0.717827	0.377771	0.0574115	-1.45826	0.022604	0.487811	0.232641	1.02286
	id.exposure	id.outcome	outcome	exposure	method	nsnp	b	se	pval	lo_ci	up_ci	or	or_lci95	or_uci95
1	Parental longevity (mother's attained age)	Endometrial cancer (endometrioid histology)	ebi-a-GCST006465	Parental longevity (mother's attained age) || id:ebi-a-GCST006696	MR Egger	4	-0.782848	0.887586	0.470816	-2.52252	0.956821	0.457102	0.0802573	2.60341
2	Parental longevity (mother's attained age)	Endometrial cancer (endometrioid histology)	ebi-a-GCST006465	Parental longevity (mother's attained age) || id:ebi-a-GCST006696	Weighted median	4	-1.50098	0.46376	0.00120988	-2.40995	-0.592008	0.222912	0.0898202	0.553215
3	Parental longevity (mother's attained age)	Endometrial cancer (endometrioid histology)	ebi-a-GCST006465	Parental longevity (mother's attained age) || id:ebi-a-GCST006696	Inverse variance weighted	4	-1.58959	0.425281	0.000185677	-2.42314	-0.756041	0.204009	0.0886428	0.469522
4	Parental longevity (mother's attained age)	Endometrial cancer (endometrioid histology)	ebi-a-GCST006465	Parental longevity (mother's attained age) || id:ebi-a-GCST006696	Simple mode	4	-1.50772	0.790587	0.152562	-3.05727	0.0418268	0.221413	0.0470156	1.04271
5	Parental longevity (mother's attained age)	Endometrial cancer (endometrioid histology)	ebi-a-GCST006465	Parental longevity (mother's attained age) || id:ebi-a-GCST006696	Weighted mode	4	-1.47687	0.472652	0.0522822	-2.40327	-0.550476	0.22835	0.0904215	0.576675
6	Parental longevity (mother's attained age)	Endometrial cancer (endometrioid histology)	ebi-a-GCST006465	Parental longevity (mother's attained age) || id:ebi-a-GCST006696	Robust adjusted profile score (RAPS)	4	-1.58693	0.464975	0.000642662	-2.49828	-0.67558	0.204552	0.0822262	0.508861
	id.exposure	id.outcome	outcome	exposure	method	nsnp	b	se	pval	lo_ci	up_ci	or	or_lci95	or_uci95
1	Variation in diet	Endometrial cancer (Non-endometrioid histology)	ebi-a-GCST006466	Variation in diet || id:ukb-b-2909	MR Egger	15	0.582721	12.0675	0.96222	-23.0696	24.2351	1.79091	9.57e-11	33508019188
2	Variation in diet	Endometrial cancer (Non-endometrioid histology)	ebi-a-GCST006466	Variation in diet || id:ukb-b-2909	Weighted median	15	-0.696079	2.18619	0.750183	-4.98101	3.58885	0.498536	0.00686714	36.1924
3	Variation in diet	Endometrial cancer (Non-endometrioid histology)	ebi-a-GCST006466	Variation in diet || id:ukb-b-2909	Inverse variance weighted	15	-2.02151	1.52367	0.184594	-5.0079	0.964872	0.132455	0.00668495	2.62445
4	Variation in diet	Endometrial cancer (Non-endometrioid histology)	ebi-a-GCST006466	Variation in diet || id:ukb-b-2909	Simple mode	15	-0.38881	3.7884	0.919711	-7.81408	7.03646	0.677863	0.000404006	1137.36
5	Variation in diet	Endometrial cancer (Non-endometrioid histology)	ebi-a-GCST006466	Variation in diet || id:ukb-b-2909	Weighted mode	15	-0.0367284	3.58883	0.991979	-7.07084	6.99738	0.963938	0.00084952	1093.77
6	Variation in diet	Endometrial cancer (Non-endometrioid histology)	ebi-a-GCST006466	Variation in diet || id:ukb-b-2909	Robust adjusted profile score (RAPS)	15	-2.17654	1.60512	0.175099	-5.32258	0.969494	0.113433	0.00488016	2.63661
	id.exposure	id.outcome	outcome	exposure	method	nsnp	b	se	pval	lo_ci	up_ci	or	or_lci95	or_uci95
1	Salt added to food	Endometrial cancer (Non-endometrioid histology)	ebi-a-GCST006466	Salt added to food || id:ukb-b-8121	MR Egger	103	-0.0604655	1.18168	0.959292	-2.37656	2.25563	0.941326	0.0928692	9.54132
2	Salt added to food	Endometrial cancer (Non-endometrioid histology)	ebi-a-GCST006466	Salt added to food || id:ukb-b-8121	Weighted median	103	-0.220746	0.525635	0.674515	-1.25099	0.8095	0.801921	0.286221	2.24678
3	Salt added to food	Endometrial cancer (Non-endometrioid histology)	ebi-a-GCST006466	Salt added to food || id:ukb-b-8121	Inverse variance weighted	103	0.0950289	0.35819	0.790776	-0.607024	0.797082	1.09969	0.54497	2.21906
4	Salt added to food	Endometrial cancer (Non-endometrioid histology)	ebi-a-GCST006466	Salt added to food || id:ukb-b-8121	Simple mode	103	-1.14719	1.36442	0.402431	-3.82146	1.52707	0.317527	0.0218959	4.60466
5	Salt added to food	Endometrial cancer (Non-endometrioid histology)	ebi-a-GCST006466	Salt added to food || id:ukb-b-8121	Weighted mode	103	-1.26267	1.04338	0.229009	-3.30769	0.782353	0.282898	0.0366005	2.18661
6	Salt added to food	Endometrial cancer (Non-endometrioid histology)	ebi-a-GCST006466	Salt added to food || id:ukb-b-8121	Robust adjusted profile score (RAPS)	103	-0.0219489	0.374366	0.953247	-0.755707	0.711809	0.97829	0.469678	2.03767
	id.exposure	id.outcome	outcome	exposure	method	nsnp	b	se	pval	lo_ci	up_ci	or	or_lci95	or_uci95
1	Average weekly beer plus cider intake	Endometrial cancer (Non-endometrioid histology)	ebi-a-GCST006466	Average weekly beer plus cider intake || id:ukb-b-5174	MR Egger	20	-7.73579	3.04805	0.0206123	-13.71	-1.76162	0.000436908	1.11e-06	0.171767
2	Average weekly beer plus cider intake	Endometrial cancer (Non-endometrioid histology)	ebi-a-GCST006466	Average weekly beer plus cider intake || id:ukb-b-5174	Weighted median	20	-0.745861	1.26906	0.556716	-3.23322	1.7415	0.474326	0.0394303	5.70589
3	Average weekly beer plus cider intake	Endometrial cancer (Non-endometrioid histology)	ebi-a-GCST006466	Average weekly beer plus cider intake || id:ukb-b-5174	Inverse variance weighted	20	-1.98853	1.04916	0.0580453	-4.04488	0.0678224	0.136896	0.0175117	1.07018
4	Average weekly beer plus cider intake	Endometrial cancer (Non-endometrioid histology)	ebi-a-GCST006466	Average weekly beer plus cider intake || id:ukb-b-5174	Simple mode	20	-0.835103	2.42104	0.733931	-5.58033	3.91013	0.43383	0.00377131	49.9053
5	Average weekly beer plus cider intake	Endometrial cancer (Non-endometrioid histology)	ebi-a-GCST006466	Average weekly beer plus cider intake || id:ukb-b-5174	Weighted mode	20	-0.835103	2.30836	0.721514	-5.35949	3.68929	0.43383	0.00470329	40.0163
6	Average weekly beer plus cider intake	Endometrial cancer (Non-endometrioid histology)	ebi-a-GCST006466	Average weekly beer plus cider intake || id:ukb-b-5174	Robust adjusted profile score (RAPS)	20	-1.38319	0.920094	0.132759	-3.18657	0.420196	0.250778	0.0413132	1.52226
	id.exposure	id.outcome	outcome	exposure	method	nsnp	b	se	pval	lo_ci	up_ci	or	or_lci95	or_uci95
1	Usual walking pace	Endometrial cancer (Non-endometrioid histology)	ebi-a-GCST006466	Usual walking pace || id:ukb-a-513	MR Egger	29	-0.43853	4.37103	0.920826	-9.00574	8.12868	0.644984	0.000122703	3390.34
2	Usual walking pace	Endometrial cancer (Non-endometrioid histology)	ebi-a-GCST006466	Usual walking pace || id:ukb-a-513	Weighted median	29	-0.818877	1.27543	0.520849	-3.31873	1.68098	0.440927	0.0361988	5.37079
3	Usual walking pace	Endometrial cancer (Non-endometrioid histology)	ebi-a-GCST006466	Usual walking pace || id:ukb-a-513	Inverse variance weighted	29	-0.126676	0.93551	0.892289	-1.96027	1.70692	0.881019	0.14082	5.51197
4	Usual walking pace	Endometrial cancer (Non-endometrioid histology)	ebi-a-GCST006466	Usual walking pace || id:ukb-a-513	Simple mode	29	-1.55837	2.98616	0.60587	-7.41125	4.29451	0.210479	0.000604414	73.2964
5	Usual walking pace	Endometrial cancer (Non-endometrioid histology)	ebi-a-GCST006466	Usual walking pace || id:ukb-a-513	Weighted mode	29	-1.49262	2.61359	0.572487	-6.61525	3.63001	0.224783	0.00133978	37.7132
6	Usual walking pace	Endometrial cancer (Non-endometrioid histology)	ebi-a-GCST006466	Usual walking pace || id:ukb-a-513	Robust adjusted profile score (RAPS)	20	-1.38319	0.920094	0.132759	-3.18657	0.420196	0.250778	0.0413132	1.52226
	id.exposure	id.outcome	outcome	exposure	method	nsnp	b	se	pval	lo_ci	up_ci	or	or_lci95	or_uci95
1	Gastroesophageal reflux disease	Endometrial cancer (Non-endometrioid histology)	ebi-a-GCST006466	Gastroesophageal reflux disease || id:ebi-a-GCST90000514	MR Egger	77	0.368969	0.99514	0.711854	-1.58151	2.31944	1.44624	0.205665	10.17
2	Gastroesophageal reflux disease	Endometrial cancer (Non-endometrioid histology)	ebi-a-GCST006466	Gastroesophageal reflux disease || id:ebi-a-GCST90000514	Weighted median	77	0.0307963	0.252816	0.903047	-0.464722	0.526315	1.03128	0.628309	1.69268
3	Gastroesophageal reflux disease	Endometrial cancer (Non-endometrioid histology)	ebi-a-GCST006466	Gastroesophageal reflux disease || id:ebi-a-GCST90000514	Inverse variance weighted	77	0.0576262	0.17561	0.7428	-0.28657	0.401823	1.05932	0.750834	1.49455
4	Gastroesophageal reflux disease	Endometrial cancer (Non-endometrioid histology)	ebi-a-GCST006466	Gastroesophageal reflux disease || id:ebi-a-GCST90000514	Simple mode	77	0.471334	0.637178	0.461749	-0.777536	1.7202	1.60213	0.459537	5.58566
5	Gastroesophageal reflux disease	Endometrial cancer (Non-endometrioid histology)	ebi-a-GCST006466	Gastroesophageal reflux disease || id:ebi-a-GCST90000514	Weighted mode	77	0.40207	0.559894	0.474886	-0.695322	1.49946	1.49492	0.498914	4.47928
6	Gastroesophageal reflux disease	Endometrial cancer (Non-endometrioid histology)	ebi-a-GCST006466	Gastroesophageal reflux disease || id:ebi-a-GCST90000514	Robust adjusted profile score (RAPS)	77	0.0293356	0.177602	0.868806	-0.318764	0.377436	1.02977	0.727047	1.45854
	id.exposure	id.outcome	outcome	exposure	method	nsnp	b	se	pval	lo_ci	up_ci	or	or_lci95	or_uci95
1	Ulcerative colitis	Endometrial cancer (Non-endometrioid histology)	ebi-a-GCST006466	Ulcerative colitis || id:ieu-a-973	MR Egger	76	0.17517	0.0900026	0.0554182	-0.0012351	0.351575	1.19145	0.998766	1.4213
2	Ulcerative colitis	Endometrial cancer (Non-endometrioid histology)	ebi-a-GCST006466	Ulcerative colitis || id:ieu-a-973	Weighted median	76	0.131506	0.0558406	0.018521	0.0220589	0.240954	1.14055	1.0223	1.27246
3	Ulcerative colitis	Endometrial cancer (Non-endometrioid histology)	ebi-a-GCST006466	Ulcerative colitis || id:ieu-a-973	Inverse variance weighted	76	0.135964	0.0418844	0.00116969	0.0538705	0.218057	1.14564	1.05535	1.24366
4	Ulcerative colitis	Endometrial cancer (Non-endometrioid histology)	ebi-a-GCST006466	Ulcerative colitis || id:ieu-a-973	Simple mode	76	0.0256247	0.122693	0.835129	-0.214853	0.266102	1.02596	0.80666	1.30487
5	Ulcerative colitis	Endometrial cancer (Non-endometrioid histology)	ebi-a-GCST006466	Ulcerative colitis || id:ieu-a-973	Weighted mode	76	0.13237	0.0997526	0.188539	-0.0631447	0.327886	1.14153	0.938808	1.38803
6	Ulcerative colitis	Endometrial cancer (Non-endometrioid histology)	ebi-a-GCST006466	Ulcerative colitis || id:ieu-a-973	Robust adjusted profile score (RAPS)	76	0.138262	0.0388116	0.000367486	0.0621915	0.214333	1.14828	1.06417	1.23903
	id.exposure	id.outcome	outcome	exposure	method	nsnp	b	se	pval	lo_ci	up_ci	or	or_lci95	or_uci95
1	Celiac disease	Endometrial cancer (Non-endometrioid histology)	ebi-a-GCST006466	Celiac disease || id:ebi-a-GCST005523	MR Egger	38	-0.0587611	0.0430728	0.180965	-0.143184	0.0256616	0.942932	0.866595	1.02599
2	Celiac disease	Endometrial cancer (Non-endometrioid histology)	ebi-a-GCST006466	Celiac disease || id:ebi-a-GCST005523	Weighted median	38	-0.0360985	0.0389129	0.353577	-0.112368	0.0401707	0.964545	0.893716	1.04099
3	Celiac disease	Endometrial cancer (Non-endometrioid histology)	ebi-a-GCST006466	Celiac disease || id:ebi-a-GCST005523	Inverse variance weighted	38	-0.0393056	0.0276933	0.155806	-0.0935844	0.0149733	0.961457	0.910661	1.01509
4	Celiac disease	Endometrial cancer (Non-endometrioid histology)	ebi-a-GCST006466	Celiac disease || id:ebi-a-GCST005523	Simple mode	38	-0.0478751	0.0803639	0.554983	-0.205388	0.109638	0.953253	0.814331	1.11587
5	Celiac disease	Endometrial cancer (Non-endometrioid histology)	ebi-a-GCST006466	Celiac disease || id:ebi-a-GCST005523	Weighted mode	38	-0.0361474	0.0349753	0.308073	-0.104699	0.0324042	0.964498	0.900596	1.03293
6	Celiac disease	Endometrial cancer (Non-endometrioid histology)	ebi-a-GCST006466	Celiac disease || id:ebi-a-GCST005523	Robust adjusted profile score (RAPS)	38	-0.0348924	0.0285518	0.22168	-0.090854	0.0210692	0.965709	0.913151	1.02129
	id.exposure	id.outcome	outcome	exposure	method	nsnp	b	se	pval	lo_ci	up_ci	or	or_lci95	or_uci95
1	Age first had sexual intercourse	Endometrial cancer (Non-endometrioid histology)	ebi-a-GCST006466	Age first had sexual intercourse || id:ukb-b-6591	MR Egger	190	0.115784	1.09946	0.916242	-2.03915	2.27072	1.12275	0.130139	9.68634
2	Age first had sexual intercourse	Endometrial cancer (Non-endometrioid histology)	ebi-a-GCST006466	Age first had sexual intercourse || id:ukb-b-6591	Weighted median	190	0.0443911	0.344616	0.897505	-0.631056	0.719838	1.04539	0.53203	2.0541
3	Age first had sexual intercourse	Endometrial cancer (Non-endometrioid histology)	ebi-a-GCST006466	Age first had sexual intercourse || id:ukb-b-6591	Inverse variance weighted	190	0.0598996	0.238136	0.8014	-0.406847	0.526646	1.06173	0.665746	1.69324
4	Age first had sexual intercourse	Endometrial cancer (Non-endometrioid histology)	ebi-a-GCST006466	Age first had sexual intercourse || id:ukb-b-6591	Simple mode	190	-0.202377	1.02749	0.844069	-2.21626	1.81151	0.816787	0.109016	6.11966
5	Age first had sexual intercourse	Endometrial cancer (Non-endometrioid histology)	ebi-a-GCST006466	Age first had sexual intercourse || id:ukb-b-6591	Weighted mode	190	-0.0587352	0.889988	0.947451	-1.80311	1.68564	0.942956	0.164785	5.39591
6	Age first had sexual intercourse	Endometrial cancer (Non-endometrioid histology)	ebi-a-GCST006466	Age first had sexual intercourse || id:ukb-b-6591	Robust adjusted profile score (RAPS)	190	0.157827	0.253339	0.533293	-0.338718	0.654372	1.17096	0.712684	1.92393
	id.exposure	id.outcome	outcome	exposure	method	nsnp	b	se	pval	lo_ci	up_ci	or	or_lci95	or_uci95
1	Length of menstrual cycle	Endometrial cancer (Non-endometrioid histology)	ebi-a-GCST006466	Length of menstrual cycle || id:ukb-a-351	MR Egger	6	0.981034	1.25061	0.476632	-1.47017	3.43224	2.66721	0.229887	30.9457
2	Length of menstrual cycle	Endometrial cancer (Non-endometrioid histology)	ebi-a-GCST006466	Length of menstrual cycle || id:ukb-a-351	Weighted median	6	0.488493	0.403287	0.225789	-0.30195	1.27894	1.62986	0.739375	3.59282
3	Length of menstrual cycle	Endometrial cancer (Non-endometrioid histology)	ebi-a-GCST006466	Length of menstrual cycle || id:ukb-a-351	Inverse variance weighted	6	0.545812	0.494919	0.2701	-0.424229	1.51585	1.72601	0.654274	4.5533
4	Length of menstrual cycle	Endometrial cancer (Non-endometrioid histology)	ebi-a-GCST006466	Length of menstrual cycle || id:ukb-a-351	Simple mode	6	-0.196288	0.788253	0.813254	-1.74126	1.34869	0.821775	0.175299	3.85237
5	Length of menstrual cycle	Endometrial cancer (Non-endometrioid histology)	ebi-a-GCST006466	Length of menstrual cycle || id:ukb-a-351	Weighted mode	6	0.495718	0.450247	0.321058	-0.386766	1.3782	1.64168	0.67925	3.96776
6	Length of menstrual cycle	Endometrial cancer (Non-endometrioid histology)	ebi-a-GCST006466	Length of menstrual cycle || id:ukb-a-351	Robust adjusted profile score (RAPS)	6	0.530906	0.471746	0.260417	-0.393716	1.45553	1.70047	0.674545	4.28674
	id.exposure	id.outcome	outcome	exposure	method	nsnp	b	se	pval	lo_ci	up_ci	or	or_lci95	or_uci95
1	Comparative body size at age 10	Endometrial cancer (Non-endometrioid histology)	ebi-a-GCST006466	Comparative body size at age 10 || id:ukb-a-34	MR Egger	156	1.11421	0.586348	0.0592689	-0.0350333	2.26345	3.04715	0.965573	9.6162
2	Comparative body size at age 10	Endometrial cancer (Non-endometrioid histology)	ebi-a-GCST006466	Comparative body size at age 10 || id:ukb-a-34	Weighted median	156	0.387942	0.433734	0.371095	-0.462177	1.23806	1.47394	0.629911	3.44892
3	Comparative body size at age 10	Endometrial cancer (Non-endometrioid histology)	ebi-a-GCST006466	Comparative body size at age 10 || id:ukb-a-34	Inverse variance weighted	156	0.80065	0.265066	0.00252301	0.281121	1.32018	2.22699	1.32461	3.74409
4	Comparative body size at age 10	Endometrial cancer (Non-endometrioid histology)	ebi-a-GCST006466	Comparative body size at age 10 || id:ukb-a-34	Simple mode	156	1.64764	1.09398	0.134078	-0.496563	3.79185	5.19473	0.608619	44.3384
5	Comparative body size at age 10	Endometrial cancer (Non-endometrioid histology)	ebi-a-GCST006466	Comparative body size at age 10 || id:ukb-a-34	Weighted mode	156	0.34877	0.593166	0.557401	-0.813835	1.51137	1.41732	0.443155	4.53296
6	Comparative body size at age 10	Endometrial cancer (Non-endometrioid histology)	ebi-a-GCST006466	Comparative body size at age 10 || id:ukb-a-34	Robust adjusted profile score (RAPS)	156	0.781307	0.271148	0.00395811	0.249857	1.31276	2.18432	1.28384	3.7164
	id.exposure	id.outcome	outcome	exposure	method	nsnp	b	se	pval	lo_ci	up_ci	or	or_lci95	or_uci95
1	Parental longevity (father's attained age)	Endometrial cancer (Non-endometrioid histology)	ebi-a-GCST006466	Parental longevity (father's attained age) || id:ebi-a-GCST006701	MR Egger	14	-3.33089	2.50766	0.208793	-8.24591	1.58413	0.0357613	0.00026233	4.87504
2	Parental longevity (father's attained age)	Endometrial cancer (Non-endometrioid histology)	ebi-a-GCST006466	Parental longevity (father's attained age) || id:ebi-a-GCST006701	Weighted median	14	-0.94483	1.16938	0.419104	-3.23681	1.34715	0.388746	0.0392889	3.84646
3	Parental longevity (father's attained age)	Endometrial cancer (Non-endometrioid histology)	ebi-a-GCST006466	Parental longevity (father's attained age) || id:ebi-a-GCST006701	Inverse variance weighted	14	-0.994229	0.922571	0.28118	-2.80247	0.814009	0.370008	0.0606602	2.25694
4	Parental longevity (father's attained age)	Endometrial cancer (Non-endometrioid histology)	ebi-a-GCST006466	Parental longevity (father's attained age) || id:ebi-a-GCST006701	Simple mode	14	-2.68927	2.25818	0.254984	-7.1153	1.73676	0.0679307	0.00081258	5.67893
5	Parental longevity (father's attained age)	Endometrial cancer (Non-endometrioid histology)	ebi-a-GCST006466	Parental longevity (father's attained age) || id:ebi-a-GCST006701	Weighted mode	14	-1.23283	1.82878	0.51204	-4.81725	2.35158	0.291466	0.00808899	10.5022
6	Parental longevity (father's attained age)	Endometrial cancer (Non-endometrioid histology)	ebi-a-GCST006466	Parental longevity (father's attained age) || id:ebi-a-GCST006701	Robust adjusted profile score (RAPS)	14	-1.07378	1.02324	0.293996	-3.07933	0.931765	0.341714	0.0459902	2.53899
	id.exposure	id.outcome	outcome	exposure	method	nsnp	b	se	pval	lo_ci	up_ci	or	or_lci95	or_uci95
1	Parental longevity (mother's attained age)	Endometrial cancer (Non-endometrioid histology)	ebi-a-GCST006466	Parental longevity (mother's attained age) || id:ebi-a-GCST006696	MR Egger	4	-2.84393	3.38924	0.489723	-9.48683	3.79897	0.0581965	7.58e-05	44.6552
2	Parental longevity (mother's attained age)	Endometrial cancer (Non-endometrioid histology)	ebi-a-GCST006466	Parental longevity (mother's attained age) || id:ebi-a-GCST006696	Weighted median	4	-3.05138	1.16835	0.0090094	-5.34135	-0.761411	0.0472937	0.00478942	0.467007
3	Parental longevity (mother's attained age)	Endometrial cancer (Non-endometrioid histology)	ebi-a-GCST006466	Parental longevity (mother's attained age) || id:ebi-a-GCST006696	Inverse variance weighted	4	-2.50664	1.33705	0.0608277	-5.12726	0.113989	0.081542	0.00593278	1.12074
4	Parental longevity (mother's attained age)	Endometrial cancer (Non-endometrioid histology)	ebi-a-GCST006466	Parental longevity (mother's attained age) || id:ebi-a-GCST006696	Simple mode	4	-3.80018	1.68015	0.108744	-7.09328	-0.507084	0.0223667	0.000830669	0.602249
5	Parental longevity (mother's attained age)	Endometrial cancer (Non-endometrioid histology)	ebi-a-GCST006466	Parental longevity (mother's attained age) || id:ebi-a-GCST006696	Weighted mode	4	-3.02984	1.15543	0.0788476	-5.29449	-0.765201	0.0483232	0.00501918	0.46524
6	Parental longevity (mother's attained age)	Endometrial cancer (Non-endometrioid histology)	ebi-a-GCST006466	Parental longevity (mother's attained age) || id:ebi-a-GCST006696	Robust adjusted profile score (RAPS)	4	-2.75535	1.11169	0.0131932	-4.93427	-0.576425	0.0635871	0.00719574	0.561904
