# Supplementary material for: Causal effects of multiple exposures on endometrial cancer and its subtypes: A two-sample Mendelian randomized study
Source: Research Square preprint supplement (doi:10.21203/rs.3.rs-8340876/v1), 2026-01-16
Supplement: Supplementary file 5 [file a477268e23f7aa894049b56b.xlsx]

## Sheet: Sheet1
imes	chr.exposure	pos.exposure	SNP	effect_allele.exposure	other_allele.exposure	eaf.exposure	beta.exposure	se.exposure	pval.exposure	samplesize.exposure	exposure	mr_keep.exposure	pval_origin.exposure	data_source.exposure	Fz	Fz
ukb-b-2909	3	49949834	rs7634084	T	A	0.515247	0.00899558	0.00123338	3e-13	460884	Variation in diet || id:ukb-b-2909	TRUE	reported	igd	53.194	29.7186
ukb-b-2909	16	53800954	rs1421085	C	T	0.403409	0.00893029	0.00125702	1.2e-12	460884	Variation in diet || id:ukb-b-2909	TRUE	reported	igd	50.4713	29.7411
ukb-b-2909	2	199182704	rs997467	C	T	0.57193	0.00884238	0.00126725	3e-12	460884	Variation in diet || id:ukb-b-2909	TRUE	reported	igd	48.6869	29.7416
ukb-b-2909	3	135986087	rs606725	G	A	0.749543	0.00983869	0.00142617	5.2e-12	460884	Variation in diet || id:ukb-b-2909	TRUE	reported	igd	47.5916	29.7488
ukb-b-2909	6	69822457	rs728083	G	C	0.232558	-0.00994294	0.00146285	1.1e-11	460884	Variation in diet || id:ukb-b-2909	TRUE	reported	igd	46.1985	29.7537
ukb-b-2909	12	110819139	rs28637922	T	G	0.329919	0.0084982	0.00131422	1e-10	460884	Variation in diet || id:ukb-b-2909	TRUE	reported	igd	41.8134	29.7567
ukb-b-2909	16	29923510	rs4548895	A	G	0.615828	0.00753446	0.00127622	3.6e-09	460884	Variation in diet || id:ukb-b-2909	TRUE	reported	igd	34.8539	29.7594
ukb-b-2909	2	145634861	rs1438900	C	A	0.408475	0.00724828	0.00125771	8.3e-09	460884	Variation in diet || id:ukb-b-2909	TRUE	reported	igd	33.2129	29.7644
ukb-b-2909	5	174866298	rs11749676	G	A	0.614976	0.0073092	0.00126852	8.3e-09	460884	Variation in diet || id:ukb-b-2909	TRUE	reported	igd	33.2004	29.7858
ukb-b-2909	11	28829882	rs1517572	C	A	0.581262	-0.0070424	0.00125138	1.8e-08	460884	Variation in diet || id:ukb-b-2909	TRUE	reported	igd	31.6709	29.7907
ukb-b-2909	14	33282232	rs10133551	C	T	0.400868	0.00709682	0.00125956	1.8e-08	460884	Variation in diet || id:ukb-b-2909	TRUE	reported	igd	31.7459	29.8072
ukb-b-2909	20	59137978	rs1561419	G	C	0.374514	-0.00725803	0.00129053	1.9e-08	460884	Variation in diet || id:ukb-b-2909	TRUE	reported	igd	31.63	29.9091
ukb-b-2909	15	75222225	rs12148513	T	C	0.377922	0.00716654	0.00128179	2.3e-08	460884	Variation in diet || id:ukb-b-2909	TRUE	reported	igd	31.2596	29.9223
ukb-b-2909	22	51114518	rs9616911	T	C	0.50876	0.00687324	0.00123338	2.5e-08	460884	Variation in diet || id:ukb-b-2909	TRUE	reported	igd	31.0547	29.951
ukb-b-2909	20	48441168	rs6063438	T	C	0.207688	0.00846232	0.00152232	2.69998e-08	460884	Variation in diet || id:ukb-b-2909	TRUE	reported	igd	30.9005	29.9972
ukb-b-2909	9	127173209	rs7027515	T	C	0.524305	-0.00679169	0.00123432	3.7e-08	460884	Variation in diet || id:ukb-b-2909	TRUE	reported	igd	30.276	30.0053
id.exposure	chr.exposure	pos.exposure	SNP	effect_allele.exposure	other_allele.exposure	eaf.exposure	beta.exposure	se.exposure	pval.exposure	samplesize.exposure	exposure	mr_keep.exposure	pval_origin.exposure	data_source.exposure	Fz	30.0224
ukb-b-8121	7	141672705	rs1726866	A	G	0.552077	0.0265437	0.00176998	7.70016e-51	462630	Salt added to food || id:ukb-b-8121	TRUE	reported	igd	224.897	30.0857
ukb-b-8121	22	43153807	rs9611875	G	A	0.039616	0.0662007	0.00451868	1.29987e-48	462630	Salt added to food || id:ukb-b-8121	TRUE	reported	igd	214.635	30.1157
ukb-b-8121	3	60815608	rs2736748	G	A	0.789193	0.0280118	0.00215956	1.80011e-38	462630	Salt added to food || id:ukb-b-8121	TRUE	reported	igd	168.248	30.1354
ukb-b-8121	5	51375189	rs12658060	C	T	0.222971	-0.0274145	0.00211762	2.49977e-38	462630	Salt added to food || id:ukb-b-8121	TRUE	reported	igd	167.596	30.1622
ukb-b-8121	2	145632077	rs7591518	C	T	0.298453	-0.0207723	0.00192978	5.10035e-27	462630	Salt added to food || id:ukb-b-8121	TRUE	reported	igd	115.865	30.1853
ukb-b-8121	2	138318976	rs13400612	G	C	0.246906	0.0202846	0.00204252	2.99985e-23	462630	Salt added to food || id:ukb-b-8121	TRUE	reported	igd	98.6276	30.2198
ukb-b-8121	10	62792589	rs4595499	T	C	0.391888	-0.0172775	0.00180773	1.20005e-21	462630	Salt added to food || id:ukb-b-8121	TRUE	reported	igd	91.3467	30.2545
ukb-b-8121	5	170612546	rs2339234	A	G	0.683186	-0.0176416	0.00190008	1.59993e-20	462630	Salt added to food || id:ukb-b-8121	TRUE	reported	igd	86.2046	30.2669
ukb-b-8121	3	85593584	rs6780346	T	C	0.620997	-0.0168372	0.00181724	1.9002e-20	462630	Salt added to food || id:ukb-b-8121	TRUE	reported	igd	85.8447	30.276
ukb-b-8121	3	18634962	rs400750	G	T	0.616712	0.016712	0.00181467	3.29989e-20	462630	Salt added to food || id:ukb-b-8121	TRUE	reported	igd	84.8125	30.3247
ukb-b-8121	2	45154908	rs528301	A	G	0.554846	0.0152609	0.00177008	6.59933e-18	462630	Salt added to food || id:ukb-b-8121	TRUE	reported	igd	74.3315	30.3436
ukb-b-8121	1	44808461	rs11210985	A	G	0.3791	-0.0156565	0.00181806	7.19946e-18	462630	Salt added to food || id:ukb-b-8121	TRUE	reported	igd	74.1602	30.3439
ukb-b-8121	11	126757949	rs7927679	T	C	0.504024	0.0149539	0.00176398	2.29985e-17	462630	Salt added to food || id:ukb-b-8121	TRUE	reported	igd	71.8654	30.3688
ukb-b-8121	6	104003425	rs2506738	G	A	0.401141	-0.0151014	0.00180067	5.00035e-17	462630	Salt added to food || id:ukb-b-8121	TRUE	reported	igd	70.3338	30.4357
ukb-b-8121	3	60377674	rs736935	T	C	0.336413	0.0156881	0.00187874	6.79986e-17	462630	Salt added to food || id:ukb-b-8121	TRUE	reported	igd	69.7277	30.467
ukb-b-8121	5	116566836	rs868720	C	G	0.305451	0.0159938	0.00192468	9.60064e-17	462630	Salt added to food || id:ukb-b-8121	TRUE	reported	igd	69.0533	30.4741
ukb-b-8121	18	58819108	rs62098445	A	C	0.318657	-0.0158642	0.00191149	1e-16	462630	Salt added to food || id:ukb-b-8121	TRUE	reported	igd	68.8796	30.4785
ukb-b-8121	6	33326699	rs9278020	A	G	0.10619	0.0232222	0.00286151	4.79954e-16	462630	Salt added to food || id:ukb-b-8121	TRUE	reported	igd	65.8589	30.4915
ukb-b-8121	6	9516653	rs35099536	C	A	0.08461	0.0259587	0.00320749	5.79963e-16	462630	Salt added to food || id:ukb-b-8121	TRUE	reported	igd	65.4988	30.5056
ukb-b-8121	3	83242378	rs9843358	T	C	0.171903	0.0189528	0.00234421	6.20012e-16	462630	Salt added to food || id:ukb-b-8121	TRUE	reported	igd	65.366	30.528
ukb-b-8121	9	22488678	rs586716	A	G	0.414681	0.0143673	0.00179338	1.10002e-15	462630	Salt added to food || id:ukb-b-8121	TRUE	reported	igd	64.1806	30.533
ukb-b-8121	2	164378068	rs12988960	C	G	0.315972	0.014981	0.00189646	2.80027e-15	462630	Salt added to food || id:ukb-b-8121	TRUE	reported	igd	62.4011	30.5332
ukb-b-8121	3	183817727	rs6443950	T	A	0.631504	-0.0142051	0.00183062	8.49963e-15	462630	Salt added to food || id:ukb-b-8121	TRUE	reported	igd	60.213	30.5668
ukb-b-8121	13	31033232	rs1045411	T	C	0.268305	-0.0150663	0.0019926	4.00037e-14	462630	Salt added to food || id:ukb-b-8121	TRUE	reported	igd	57.1704	30.5865
ukb-b-8121	18	37189171	rs2852348	G	A	0.458696	-0.0131167	0.0017774	1.59993e-13	462630	Salt added to food || id:ukb-b-8121	TRUE	reported	igd	54.4599	30.6189
ukb-b-8121	10	63136622	rs4948275	T	C	0.481851	0.0127146	0.00177265	7.39946e-13	462630	Salt added to food || id:ukb-b-8121	TRUE	reported	igd	51.4467	30.6262
ukb-b-8121	2	212590841	rs55897719	A	C	0.316817	0.0135021	0.001896	1.10002e-12	462630	Salt added to food || id:ukb-b-8121	TRUE	reported	igd	50.7136	30.6402
ukb-b-8121	8	64496159	rs4739105	C	T	0.787781	0.0154648	0.00218013	1.29987e-12	462630	Salt added to food || id:ukb-b-8121	TRUE	reported	igd	50.3178	30.6441
ukb-b-8121	11	31010455	rs9667150	A	G	0.559523	0.012589	0.0017806	1.50003e-12	462630	Salt added to food || id:ukb-b-8121	TRUE	reported	igd	49.9859	30.6659
ukb-b-8121	4	54972890	rs12501838	T	A	0.23366	0.0146672	0.0020816	1.80011e-12	462630	Salt added to food || id:ukb-b-8121	TRUE	reported	igd	49.6476	30.6767
ukb-b-8121	17	38269759	rs35142265	G	A	0.218202	0.0150134	0.00213637	2.09991e-12	462630	Salt added to food || id:ukb-b-8121	TRUE	reported	igd	49.3859	30.6821
ukb-b-8121	4	18251259	rs7673170	A	G	0.395273	-0.0125967	0.00180133	2.70023e-12	462630	Salt added to food || id:ukb-b-8121	TRUE	reported	igd	48.9018	30.7024
ukb-b-8121	7	1858651	rs11761254	T	C	0.136978	-0.0176809	0.00254593	3.80014e-12	462630	Salt added to food || id:ukb-b-8121	TRUE	reported	igd	48.2296	30.7205
ukb-b-8121	5	106438742	rs6887291	G	T	0.636126	0.0126757	0.00183649	5.10035e-12	462630	Salt added to food || id:ukb-b-8121	TRUE	reported	igd	47.6392	30.732
ukb-b-8121	12	110046112	rs12579997	C	G	0.170455	0.0160311	0.00234785	8.60003e-12	462630	Salt added to food || id:ukb-b-8121	TRUE	reported	igd	46.6213	30.7413
ukb-b-8121	5	158064276	rs33137	T	C	0.493871	-0.0120839	0.00177315	9.3994e-12	462630	Salt added to food || id:ukb-b-8121	TRUE	reported	igd	46.4431	30.7593
ukb-b-8121	3	49596593	rs11130206	G	C	0.432321	-0.0120324	0.00177553	1.20005e-11	462630	Salt added to food || id:ukb-b-8121	TRUE	reported	igd	45.9247	30.7667
ukb-b-8121	5	103818412	rs4235642	G	A	0.379691	0.0122937	0.00181648	1.29987e-11	462630	Salt added to food || id:ukb-b-8121	TRUE	reported	igd	45.8039	30.8043
ukb-b-8121	2	177070172	rs17805497	C	T	0.345071	0.0124815	0.00185017	1.50003e-11	462630	Salt added to food || id:ukb-b-8121	TRUE	reported	igd	45.5102	30.8094
ukb-b-8121	6	126896782	rs9375448	T	A	0.492981	-0.0116787	0.00176162	3.40017e-11	462630	Salt added to food || id:ukb-b-8121	TRUE	reported	igd	43.9504	30.8105
ukb-b-8121	1	187279690	rs10752999	C	A	0.702035	0.0127624	0.00192721	3.50026e-11	462630	Salt added to food || id:ukb-b-8121	TRUE	reported	igd	43.8535	30.8259
ukb-b-8121	9	23190841	rs7465705	A	G	0.384538	-0.0118468	0.00181578	6.79986e-11	462630	Salt added to food || id:ukb-b-8121	TRUE	reported	igd	42.5671	30.8425
ukb-b-8121	11	99719509	rs12789951	T	C	0.411036	-0.0117174	0.00179694	7.00003e-11	462630	Salt added to food || id:ukb-b-8121	TRUE	reported	igd	42.52	30.8686
ukb-b-8121	13	58370948	rs9569747	G	T	0.298073	-0.0125594	0.00193552	8.60003e-11	462630	Salt added to food || id:ukb-b-8121	TRUE	reported	igd	42.1057	30.9005
ukb-b-8121	4	67230580	rs7670308	A	G	0.409195	-0.0116397	0.00180121	1e-10	462630	Salt added to food || id:ukb-b-8121	TRUE	reported	igd	41.7593	30.9016
ukb-b-8121	1	91189731	rs1008078	T	C	0.395512	0.0116597	0.00180649	1.09999e-10	462630	Salt added to food || id:ukb-b-8121	TRUE	reported	igd	41.6583	30.9041
ukb-b-8121	4	67801134	rs4860797	A	G	0.601276	0.011667	0.00180763	1.09999e-10	462630	Salt added to food || id:ukb-b-8121	TRUE	reported	igd	41.6579	30.9085
ukb-b-8121	8	22746069	rs2457427	C	T	0.863856	-0.0165822	0.00256949	1.09999e-10	462630	Salt added to food || id:ukb-b-8121	TRUE	reported	igd	41.6475	30.9548
ukb-b-8121	11	120175749	rs7110845	G	A	0.579174	-0.0115376	0.00178627	1.09999e-10	462630	Salt added to food || id:ukb-b-8121	TRUE	reported	igd	41.7191	30.9564
ukb-b-8121	14	99672917	rs2693687	T	C	0.393736	0.0116279	0.00182047	1.7e-10	462630	Salt added to food || id:ukb-b-8121	TRUE	reported	igd	40.7975	30.9899
ukb-b-8121	6	32238496	rs28366169	A	G	0.077319	-0.0208479	0.00329942	2.59998e-10	462630	Salt added to food || id:ukb-b-8121	TRUE	reported	igd	39.9252	30.9984
ukb-b-8121	19	45411941	rs429358	C	T	0.154168	-0.0153977	0.00244198	2.90001e-10	462630	Salt added to food || id:ukb-b-8121	TRUE	reported	igd	39.7581	31.0398
ukb-b-8121	14	33985724	rs4981196	C	A	0.635898	-0.0114561	0.00182248	3.29997e-10	462630	Salt added to food || id:ukb-b-8121	TRUE	reported	igd	39.5136	31.0547
ukb-b-8121	14	98883534	rs8022455	C	T	0.54702	-0.0111417	0.00177399	3.40001e-10	462630	Salt added to food || id:ukb-b-8121	TRUE	reported	igd	39.4456	31.0656
ukb-b-8121	15	50908697	rs491907	G	A	0.511555	0.0109863	0.00176296	4.60002e-10	462630	Salt added to food || id:ukb-b-8121	TRUE	reported	igd	38.8344	31.0916
ukb-b-8121	11	2442707	rs11022746	G	T	0.681941	0.0118271	0.0019132	6.29999e-10	462630	Salt added to food || id:ukb-b-8121	TRUE	reported	igd	38.215	31.0942
ukb-b-8121	10	281710	rs10736951	C	G	0.635537	-0.0113624	0.001843	7.00003e-10	462630	Salt added to food || id:ukb-b-8121	TRUE	reported	igd	38.0091	31.124
ukb-b-8121	15	91437388	rs2521501	T	A	0.322086	-0.0113954	0.00190039	2e-09	462630	Salt added to food || id:ukb-b-8121	TRUE	reported	igd	35.956	31.1338
ukb-b-8121	4	101738082	rs34906832	G	A	0.140896	0.0150976	0.00253007	2.39999e-09	462630	Salt added to food || id:ukb-b-8121	TRUE	reported	igd	35.6081	31.1373
ukb-b-8121	2	26928811	rs11126666	A	G	0.255562	-0.0119879	0.00201908	2.90001e-09	462630	Salt added to food || id:ukb-b-8121	TRUE	reported	igd	35.2515	31.1755
ukb-b-8121	13	80061074	rs7982263	C	T	0.581981	0.0106084	0.0017875	2.90001e-09	462630	Salt added to food || id:ukb-b-8121	TRUE	reported	igd	35.2213	31.2038
ukb-b-8121	4	178963783	rs13131880	C	T	0.220413	-0.0126193	0.00212752	2.99999e-09	462630	Salt added to food || id:ukb-b-8121	TRUE	reported	igd	35.1821	31.2167
ukb-b-8121	10	104655315	rs10883796	A	G	0.294358	0.0114406	0.00193424	3.29997e-09	462630	Salt added to food || id:ukb-b-8121	TRUE	reported	igd	34.9844	31.2258
ukb-b-8121	11	61596633	rs99780	T	C	0.350239	0.0109071	0.00184757	3.59998e-09	462630	Salt added to food || id:ukb-b-8121	TRUE	reported	igd	34.851	31.249
ukb-b-8121	2	143958864	rs7581335	T	A	0.140518	0.014931	0.00253318	3.79997e-09	462630	Salt added to food || id:ukb-b-8121	TRUE	reported	igd	34.7411	31.2525
ukb-b-8121	13	64819020	rs9317406	T	C	0.376115	-0.0107015	0.00182384	4.39997e-09	462630	Salt added to food || id:ukb-b-8121	TRUE	reported	igd	34.4282	31.2596
ukb-b-8121	9	34116083	rs10971930	C	T	0.127418	0.0155012	0.00264358	4.49997e-09	462630	Salt added to food || id:ukb-b-8121	TRUE	reported	igd	34.383	31.2664
ukb-b-8121	10	86845915	rs10128297	T	C	0.402787	-0.0105548	0.00180004	4.49997e-09	462630	Salt added to food || id:ukb-b-8121	TRUE	reported	igd	34.3822	31.2686
ukb-b-8121	18	35155910	rs4799949	T	C	0.667226	-0.0109799	0.00187206	4.49997e-09	462630	Salt added to food || id:ukb-b-8121	TRUE	reported	igd	34.3998	31.2714
ukb-b-8121	12	10961174	rs667128	T	C	0.126584	0.0154255	0.00265228	5.99998e-09	462630	Salt added to food || id:ukb-b-8121	TRUE	reported	igd	33.825	31.2724
ukb-b-8121	11	133794599	rs329670	C	T	0.870289	-0.0152915	0.00263275	6.29999e-09	462630	Salt added to food || id:ukb-b-8121	TRUE	reported	igd	33.7349	31.2739
ukb-b-8121	2	104288396	rs264932	G	A	0.605889	-0.0104199	0.0018018	7.29995e-09	462630	Salt added to food || id:ukb-b-8121	TRUE	reported	igd	33.4435	31.2904
ukb-b-8121	3	119833578	rs6804929	A	G	0.105016	0.0167058	0.0028892	7.39997e-09	462630	Salt added to food || id:ukb-b-8121	TRUE	reported	igd	33.4332	31.4625
ukb-b-8121	2	63495365	rs2263636	C	A	0.719001	0.0112558	0.00196454	1e-08	462630	Salt added to food || id:ukb-b-8121	TRUE	reported	igd	32.8268	31.4701
ukb-b-8121	11	17411020	rs35271178	T	C	0.588507	0.010244	0.00179093	1.09999e-08	462630	Salt added to food || id:ukb-b-8121	TRUE	reported	igd	32.7175	31.4713
ukb-b-8121	2	198880378	rs976179	T	A	0.485324	0.0100673	0.00176491	1.2e-08	462630	Salt added to food || id:ukb-b-8121	TRUE	reported	igd	32.5371	31.4777
ukb-b-8121	3	18466059	rs73040343	G	A	0.381434	-0.0103509	0.00181415	1.2e-08	462630	Salt added to food || id:ukb-b-8121	TRUE	reported	igd	32.5543	31.551
ukb-b-8121	16	24736408	rs2547040	C	G	0.805074	-0.0127081	0.00222943	1.2e-08	462630	Salt added to food || id:ukb-b-8121	TRUE	reported	igd	32.4916	31.5643
ukb-b-8121	3	33420650	rs6776248	C	T	0.26336	0.0113408	0.00199794	1.40001e-08	462630	Salt added to food || id:ukb-b-8121	TRUE	reported	igd	32.2196	31.5663
ukb-b-8121	16	82861212	rs72807804	T	C	0.218782	0.0120641	0.00213899	1.7e-08	462630	Salt added to food || id:ukb-b-8121	TRUE	reported	igd	31.8105	31.63
ukb-b-8121	1	201733115	rs12094804	G	A	0.061754	0.0205059	0.00365579	2e-08	462630	Salt added to food || id:ukb-b-8121	TRUE	reported	igd	31.4625	31.667
ukb-b-8121	8	71570989	rs6987313	C	T	0.520156	0.00990698	0.00176579	2e-08	462630	Salt added to food || id:ukb-b-8121	TRUE	reported	igd	31.4777	31.6674
ukb-b-8121	9	11592801	rs7021360	A	C	0.388225	-0.0101193	0.00181012	2.30001e-08	462630	Salt added to food || id:ukb-b-8121	TRUE	reported	igd	31.2525	31.6709
ukb-b-8121	15	54936197	rs8040685	T	C	0.884465	-0.0154071	0.00275814	2.30001e-08	462630	Salt added to food || id:ukb-b-8121	TRUE	reported	igd	31.2038	31.6855
ukb-b-8121	3	85766025	rs9835772	T	A	0.243664	0.0114509	0.0020521	2.39999e-08	462630	Salt added to food || id:ukb-b-8121	TRUE	reported	igd	31.1373	31.6873
ukb-b-8121	18	1839564	rs8097544	G	A	0.145366	0.0140302	0.00251279	2.39999e-08	462630	Salt added to food || id:ukb-b-8121	TRUE	reported	igd	31.1755	31.6961
ukb-b-8121	22	41815609	rs2899345	C	T	0.504298	0.00988666	0.001773	2.5e-08	462630	Salt added to food || id:ukb-b-8121	TRUE	reported	igd	31.0942	31.7109
ukb-b-8121	11	841284	rs35702851	C	G	0.204203	0.0121964	0.00219059	2.59998e-08	462630	Salt added to food || id:ukb-b-8121	TRUE	reported	igd	30.9984	31.7459
ukb-b-8121	4	90131593	rs526210	A	G	0.542868	0.010095	0.00181871	2.80001e-08	462630	Salt added to food || id:ukb-b-8121	TRUE	reported	igd	30.8094	31.7678
ukb-b-8121	4	94242898	rs3890316	A	G	0.249954	-0.0113326	0.00204164	2.80001e-08	462630	Salt added to food || id:ukb-b-8121	TRUE	reported	igd	30.8105	31.8105
ukb-b-8121	1	44010571	rs6695915	G	A	0.095551	-0.0166292	0.00299835	2.90001e-08	462630	Salt added to food || id:ukb-b-8121	TRUE	reported	igd	30.7593	31.8305
ukb-b-8121	5	142402117	rs4912891	C	T	0.691882	0.0106552	0.00192298	2.99999e-08	462630	Salt added to food || id:ukb-b-8121	TRUE	reported	igd	30.7024	31.8373
ukb-b-8121	14	87608094	rs961044	T	C	0.857621	-0.0140077	0.00252727	2.99999e-08	462630	Salt added to food || id:ukb-b-8121	TRUE	reported	igd	30.7205	31.8954
ukb-b-8121	12	57487729	rs324018	G	T	0.613528	0.0100101	0.00181156	3.29997e-08	462630	Salt added to food || id:ukb-b-8121	TRUE	reported	igd	30.533	31.9132
ukb-b-8121	16	68567500	rs1728779	G	A	0.436092	0.00987078	0.0017892	3.50002e-08	462630	Salt added to food || id:ukb-b-8121	TRUE	reported	igd	30.4357	31.9944
ukb-b-8121	14	26985560	rs10140751	T	G	0.245951	-0.0112745	0.00204674	3.59998e-08	462630	Salt added to food || id:ukb-b-8121	TRUE	reported	igd	30.3436	32.0026
ukb-b-8121	6	12167286	rs4236065	C	T	0.255885	-0.0111709	0.0020305	3.79997e-08	462630	Salt added to food || id:ukb-b-8121	TRUE	reported	igd	30.2669	32.029
ukb-b-8121	18	42781374	rs11082431	T	C	0.301904	0.0105645	0.00192067	3.79997e-08	462630	Salt added to food || id:ukb-b-8121	TRUE	reported	igd	30.2545	32.0606
ukb-b-8121	5	85698520	rs1823011	G	A	0.659939	-0.0102255	0.00186117	3.89996e-08	462630	Salt added to food || id:ukb-b-8121	TRUE	reported	igd	30.1853	32.0674
ukb-b-8121	16	13515170	rs11075194	G	A	0.425797	-0.00981656	0.00178742	4e-08	462630	Salt added to food || id:ukb-b-8121	TRUE	reported	igd	30.1622	32.0728
ukb-b-8121	21	38511531	rs2835623	T	C	0.04766	0.0226771	0.00414363	4.39997e-08	462630	Salt added to food || id:ukb-b-8121	TRUE	reported	igd	29.951	32.095
ukb-b-8121	1	163859836	rs12563932	C	A	0.029478	-0.0284929	0.00520996	4.49997e-08	462630	Salt added to food || id:ukb-b-8121	TRUE	reported	igd	29.9091	32.0982
ukb-b-8121	12	108268689	rs1895951	C	T	0.220794	-0.0116911	0.00214215	4.79999e-08	462630	Salt added to food || id:ukb-b-8121	TRUE	reported	igd	29.7858	32.109
ukb-b-8121	3	7464013	rs11717750	C	T	0.50107	-0.00960725	0.00176165	4.90004e-08	462630	Salt added to food || id:ukb-b-8121	TRUE	reported	igd	29.7411	32.1177
ukb-b-8121	6	72866597	rs2463710	A	T	0.753885	0.0119523	0.00219119	4.90004e-08	462630	Salt added to food || id:ukb-b-8121	TRUE	reported	igd	29.7537	32.123
ukb-b-8121	16	51181735	rs6416794	C	T	0.798724	-0.0119996	0.00220031	4.90004e-08	462630	Salt added to food || id:ukb-b-8121	TRUE	reported	igd	29.7416	32.1477
id.exposure	chr.exposure	pos.exposure	SNP	effect_allele.exposure	other_allele.exposure	eaf.exposure	beta.exposure	se.exposure	pval.exposure	samplesize.exposure	exposure	mr_keep.exposure	pval_origin.exposure	data_source.exposure	Fz	32.2196
ukb-b-5174	16	53800954	rs1421085	C	T	0.401556	-0.0154588	0.00174549	8.3e-19	327634	Average weekly beer plus cider intake || id:ukb-b-5174	TRUE	reported	igd	78.4358	32.2476
ukb-b-5174	4	100239319	rs1229984	C	T	0.976527	0.0482163	0.00558483	6e-18	327634	Average weekly beer plus cider intake || id:ukb-b-5174	TRUE	reported	igd	74.5358	32.2548
ukb-b-5174	1	91192396	rs12046000	T	G	0.447325	-0.0136389	0.00172363	2.5e-15	327634	Average weekly beer plus cider intake || id:ukb-b-5174	TRUE	reported	igd	62.6135	32.2808
ukb-b-5174	8	64700949	rs1520929	C	T	0.448901	0.0119855	0.00172587	3.8e-12	327634	Average weekly beer plus cider intake || id:ukb-b-5174	TRUE	reported	igd	48.2274	32.2881
ukb-b-5174	10	65096250	rs10822159	T	C	0.417863	-0.0119112	0.00173385	6.4e-12	327634	Average weekly beer plus cider intake || id:ukb-b-5174	TRUE	reported	igd	47.1938	32.2884
ukb-b-5174	3	49902160	rs2883059	C	T	0.425071	0.0116948	0.00172733	1.3e-11	327634	Average weekly beer plus cider intake || id:ukb-b-5174	TRUE	reported	igd	45.8387	32.3181
ukb-b-5174	4	39422242	rs13130794	C	T	0.368294	-0.0119638	0.00177878	1.7e-11	327634	Average weekly beer plus cider intake || id:ukb-b-5174	TRUE	reported	igd	45.2367	32.3211
ukb-b-5174	9	109380084	rs7851830	G	A	0.234411	-0.0132899	0.00201723	4.5e-11	327634	Average weekly beer plus cider intake || id:ukb-b-5174	TRUE	reported	igd	43.404	32.3236
ukb-b-5174	7	153485282	rs2533273	A	C	0.485739	0.0110845	0.00171533	1e-10	327634	Average weekly beer plus cider intake || id:ukb-b-5174	TRUE	reported	igd	41.7575	32.3707
ukb-b-5174	5	60535158	rs7712204	G	T	0.479754	-0.0110051	0.0017129	1.3e-10	327634	Average weekly beer plus cider intake || id:ukb-b-5174	TRUE	reported	igd	41.2783	32.3848
ukb-b-5174	16	73911357	rs60063924	A	T	0.494967	-0.0105921	0.00172406	8.1e-10	327634	Average weekly beer plus cider intake || id:ukb-b-5174	TRUE	reported	igd	37.7448	32.3898
ukb-b-5174	19	13149854	rs75413320	C	T	0.108113	0.0165527	0.00276055	2e-09	327634	Average weekly beer plus cider intake || id:ukb-b-5174	TRUE	reported	igd	35.9537	32.393
ukb-b-5174	8	10512511	rs9969466	C	G	0.566469	0.0103307	0.00173331	2.5e-09	327634	Average weekly beer plus cider intake || id:ukb-b-5174	TRUE	reported	igd	35.5226	32.4219
ukb-b-5174	2	45157336	rs4953150	T	C	0.345817	0.0105379	0.00180582	5.4e-09	327634	Average weekly beer plus cider intake || id:ukb-b-5174	TRUE	reported	igd	34.0531	32.4395
ukb-b-5174	4	100268602	rs34178057	C	A	0.099089	0.0165482	0.00286516	7.7e-09	327634	Average weekly beer plus cider intake || id:ukb-b-5174	TRUE	reported	igd	33.3581	32.4664
ukb-b-5174	3	159191889	rs1387695	G	T	0.574976	0.00996378	0.00173417	9.2e-09	327634	Average weekly beer plus cider intake || id:ukb-b-5174	TRUE	reported	igd	33.0113	32.4669
ukb-b-5174	3	85682888	rs9824301	C	A	0.35117	-0.0103056	0.00179806	1e-08	327634	Average weekly beer plus cider intake || id:ukb-b-5174	TRUE	reported	igd	32.85	32.4891
ukb-b-5174	16	23881080	rs55881781	T	C	0.378908	-0.0100108	0.00175899	1.3e-08	327634	Average weekly beer plus cider intake || id:ukb-b-5174	TRUE	reported	igd	32.3898	32.4916
ukb-b-5174	1	72228302	rs12135360	T	G	0.563024	-0.00975357	0.00172435	1.5e-08	327634	Average weekly beer plus cider intake || id:ukb-b-5174	TRUE	reported	igd	31.9944	32.5371
ukb-b-5174	2	207434727	rs143223375	G	C	0.035331	-0.0265688	0.00476237	2.4e-08	327634	Average weekly beer plus cider intake || id:ukb-b-5174	TRUE	reported	igd	31.124	32.5515
ukb-b-5174	18	39318794	rs57994172	A	T	0.125767	-0.0146062	0.00263074	2.8e-08	327634	Average weekly beer plus cider intake || id:ukb-b-5174	TRUE	reported	igd	30.8259	32.5543
ukb-b-5174	5	166842891	rs28478711	G	A	0.475331	-0.00953361	0.0017265	3.4e-08	327634	Average weekly beer plus cider intake || id:ukb-b-5174	TRUE	reported	igd	30.4915	32.5573
id.exposure	chr.exposure	pos.exposure	SNP	effect_allele.exposure	other_allele.exposure	eaf.exposure	beta.exposure	se.exposure	pval.exposure	samplesize.exposure	exposure	mr_keep.exposure	pval_origin.exposure	data_source.exposure	Fz	33.2936
ebi-a-GCST90000514	3	50128386	rs2240326	A	G	0.473775	-0.0471681	0.00481335	1.13e-22	602604	Gastroesophageal reflux disease || id:ebi-a-GCST90000514	TRUE	reported	igd	96.0286	33.2979
ebi-a-GCST90000514	7	2061111	rs11762636	A	C	0.180282	-0.0514827	0.00625598	1.88e-16	602604	Gastroesophageal reflux disease || id:ebi-a-GCST90000514	TRUE	reported	igd	67.7221	33.3262
ebi-a-GCST90000514	4	140938116	rs1510719	C	T	0.383439	-0.0388844	0.00494701	3.84e-15	602604	Gastroesophageal reflux disease || id:ebi-a-GCST90000514	TRUE	reported	igd	61.7823	33.3581
ebi-a-GCST90000514	1	98340139	rs17379561	T	A	0.144391	0.0530714	0.00686573	1.08e-14	602604	Gastroesophageal reflux disease || id:ebi-a-GCST90000514	TRUE	reported	igd	59.7511	33.403
ebi-a-GCST90000514	4	103188709	rs13107325	T	C	0.074445	0.0701443	0.00918312	2.2e-14	602604	Gastroesophageal reflux disease || id:ebi-a-GCST90000514	TRUE	reported	igd	58.3449	33.4332
ebi-a-GCST90000514	6	98344031	rs9372625	A	G	0.383042	-0.037727	0.0049537	2.62e-14	602604	Gastroesophageal reflux disease || id:ebi-a-GCST90000514	TRUE	reported	igd	58.0021	33.4412
ebi-a-GCST90000514	12	56374695	rs773109	A	G	0.335269	-0.0380572	0.00510213	8.71e-14	602604	Gastroesophageal reflux disease || id:ebi-a-GCST90000514	TRUE	reported	igd	55.6377	33.4435
ebi-a-GCST90000514	6	26496603	rs2145318	A	T	0.486642	0.0353431	0.0048106	2.03e-13	602604	Gastroesophageal reflux disease || id:ebi-a-GCST90000514	TRUE	reported	igd	53.9771	33.5154
ebi-a-GCST90000514	18	35138245	rs12967855	G	A	0.670435	-0.0365451	0.00513354	1.09e-12	602604	Gastroesophageal reflux disease || id:ebi-a-GCST90000514	TRUE	reported	igd	50.6784	33.5288
ebi-a-GCST90000514	13	58335375	rs1334297	A	G	0.734249	-0.0387984	0.00545512	1.14e-12	602604	Gastroesophageal reflux disease || id:ebi-a-GCST90000514	TRUE	reported	igd	50.5845	33.5816
ebi-a-GCST90000514	16	53800754	rs9940128	A	G	0.421755	0.0332513	0.00486305	8.06e-12	602604	Gastroesophageal reflux disease || id:ebi-a-GCST90000514	TRUE	reported	igd	46.7518	33.676
ebi-a-GCST90000514	8	73890335	rs3863241	T	C	0.52696	0.0324982	0.00481521	1.49e-11	602604	Gastroesophageal reflux disease || id:ebi-a-GCST90000514	TRUE	reported	igd	45.5498	33.6888
ebi-a-GCST90000514	13	99105892	rs9517313	C	G	0.383217	0.0331144	0.00494054	2.05e-11	602604	Gastroesophageal reflux disease || id:ebi-a-GCST90000514	TRUE	reported	igd	44.9245	33.6947
ebi-a-GCST90000514	7	114318071	rs2396766	A	G	0.47308	0.0322057	0.00481878	2.34e-11	602604	Gastroesophageal reflux disease || id:ebi-a-GCST90000514	TRUE	reported	igd	44.6673	33.7349
ebi-a-GCST90000514	18	50832102	rs1431196	G	A	0.428432	0.0324197	0.00486448	2.65e-11	602604	Gastroesophageal reflux disease || id:ebi-a-GCST90000514	TRUE	reported	igd	44.4164	33.7514
ebi-a-GCST90000514	2	104421692	rs6711584	A	G	0.452019	0.0322545	0.00483974	2.66e-11	602604	Gastroesophageal reflux disease || id:ebi-a-GCST90000514	TRUE	reported	igd	44.4156	33.7525
ebi-a-GCST90000514	7	32347335	rs215614	A	G	0.629725	-0.0328541	0.00497715	4.08e-11	602604	Gastroesophageal reflux disease || id:ebi-a-GCST90000514	TRUE	reported	igd	43.5729	33.7527
ebi-a-GCST90000514	1	66478840	rs1937450	G	T	0.537739	0.0315845	0.00484484	7.07e-11	602604	Gastroesophageal reflux disease || id:ebi-a-GCST90000514	TRUE	reported	igd	42.4999	33.7648
ebi-a-GCST90000514	12	123716376	rs1716171	T	C	0.790024	0.0383981	0.00590382	7.83e-11	602604	Gastroesophageal reflux disease || id:ebi-a-GCST90000514	TRUE	reported	igd	42.3011	33.825
ebi-a-GCST90000514	2	212622818	rs7600261	T	C	0.306391	0.0338034	0.00522051	9.47e-11	602604	Gastroesophageal reflux disease || id:ebi-a-GCST90000514	TRUE	reported	igd	41.927	33.8478
ebi-a-GCST90000514	2	193802478	rs1596747	G	A	0.494136	0.0310869	0.00480742	1e-10	602604	Gastroesophageal reflux disease || id:ebi-a-GCST90000514	TRUE	reported	igd	41.8147	33.8605
ebi-a-GCST90000514	1	72814783	rs2815749	G	A	0.800974	0.0388767	0.0060216	1.07e-10	602604	Gastroesophageal reflux disease || id:ebi-a-GCST90000514	TRUE	reported	igd	41.6825	33.8968
ebi-a-GCST90000514	2	100806588	rs6722661	A	G	0.364669	-0.0322543	0.00500354	1.15e-10	602604	Gastroesophageal reflux disease || id:ebi-a-GCST90000514	TRUE	reported	igd	41.5546	33.9343
ebi-a-GCST90000514	14	103377321	rs10133111	A	G	0.162996	0.0417875	0.00650789	1.35e-10	602604	Gastroesophageal reflux disease || id:ebi-a-GCST90000514	TRUE	reported	igd	41.2298	33.9516
ebi-a-GCST90000514	7	126506598	rs2106353	T	G	0.231451	0.0367491	0.00572505	1.37e-10	602604	Gastroesophageal reflux disease || id:ebi-a-GCST90000514	TRUE	reported	igd	41.2034	34.0005
ebi-a-GCST90000514	19	18449238	rs9636202	A	G	0.26663	-0.035044	0.00547191	1.51e-10	602604	Gastroesophageal reflux disease || id:ebi-a-GCST90000514	TRUE	reported	igd	41.0155	34.0204
ebi-a-GCST90000514	10	134938075	rs761777	G	A	0.254034	0.0345341	0.00554469	4.71e-10	602604	Gastroesophageal reflux disease || id:ebi-a-GCST90000514	TRUE	reported	igd	38.7918	34.0258
ebi-a-GCST90000514	10	106610839	rs1021363	G	A	0.641992	-0.031217	0.00502204	5.1e-10	602604	Gastroesophageal reflux disease || id:ebi-a-GCST90000514	TRUE	reported	igd	38.6385	34.0531
ebi-a-GCST90000514	2	22549441	rs4300861	T	C	0.38208	0.0307132	0.00494886	5.43e-10	602604	Gastroesophageal reflux disease || id:ebi-a-GCST90000514	TRUE	reported	igd	38.5157	34.1981
ebi-a-GCST90000514	5	103889998	rs1592757	C	G	0.355772	0.0311051	0.00502465	6e-10	602604	Gastroesophageal reflux disease || id:ebi-a-GCST90000514	TRUE	reported	igd	38.3222	34.2895
ebi-a-GCST90000514	16	60658751	rs12598916	G	C	0.274798	-0.0332614	0.00539171	6.87e-10	602604	Gastroesophageal reflux disease || id:ebi-a-GCST90000514	TRUE	reported	igd	38.0563	34.331
ebi-a-GCST90000514	1	32197257	rs3766823	A	G	0.171467	0.0393599	0.00638545	7.09e-10	602604	Gastroesophageal reflux disease || id:ebi-a-GCST90000514	TRUE	reported	igd	37.9947	34.3678
ebi-a-GCST90000514	14	94032065	rs942065	A	G	0.634045	0.0307384	0.00500925	8.45e-10	602604	Gastroesophageal reflux disease || id:ebi-a-GCST90000514	TRUE	reported	igd	37.6544	34.3822
ebi-a-GCST90000514	18	77580712	rs7241572	A	G	0.209101	0.0365511	0.00597464	9.49e-10	602604	Gastroesophageal reflux disease || id:ebi-a-GCST90000514	TRUE	reported	igd	37.4262	34.383
ebi-a-GCST90000514	12	15387519	rs1479405	T	C	0.3217	0.0314843	0.0051514	9.85e-10	602604	Gastroesophageal reflux disease || id:ebi-a-GCST90000514	TRUE	reported	igd	37.3539	34.3977
ebi-a-GCST90000514	7	109197067	rs2396133	G	A	0.475329	0.0293547	0.00481787	1.11e-09	602604	Gastroesophageal reflux disease || id:ebi-a-GCST90000514	TRUE	reported	igd	37.1231	34.3998
ebi-a-GCST90000514	10	21790476	rs12357321	A	G	0.311087	0.0317159	0.00523077	1.33e-09	602604	Gastroesophageal reflux disease || id:ebi-a-GCST90000514	TRUE	reported	igd	36.7639	34.4282
ebi-a-GCST90000514	13	31833578	rs9542729	G	C	0.20244	-0.0363194	0.00599914	1.41e-09	602604	Gastroesophageal reflux disease || id:ebi-a-GCST90000514	TRUE	reported	igd	36.652	34.5238
ebi-a-GCST90000514	14	75276079	rs957345	G	C	0.540235	0.0290528	0.00482393	1.72e-09	602604	Gastroesophageal reflux disease || id:ebi-a-GCST90000514	TRUE	reported	igd	36.2721	34.5377
ebi-a-GCST90000514	17	50316131	rs12453010	T	C	0.394803	0.0296967	0.00493315	1.75e-09	602604	Gastroesophageal reflux disease || id:ebi-a-GCST90000514	TRUE	reported	igd	36.2382	34.5419
ebi-a-GCST90000514	8	142630782	rs903959	A	T	0.399262	0.0291631	0.00491608	2.99e-09	602604	Gastroesophageal reflux disease || id:ebi-a-GCST90000514	TRUE	reported	igd	35.1907	34.5591
ebi-a-GCST90000514	19	18834124	rs2023878	T	C	0.192377	-0.0362846	0.00611913	3.04e-09	602604	Gastroesophageal reflux disease || id:ebi-a-GCST90000514	TRUE	reported	igd	35.1612	34.5618
ebi-a-GCST90000514	5	133864599	rs329122	A	G	0.419631	-0.0289529	0.00488358	3.05e-09	602604	Gastroesophageal reflux disease || id:ebi-a-GCST90000514	TRUE	reported	igd	35.1484	34.5668
ebi-a-GCST90000514	6	143150043	rs9373363	G	A	0.253631	-0.0326836	0.00555966	4.13e-09	602604	Gastroesophageal reflux disease || id:ebi-a-GCST90000514	TRUE	reported	igd	34.5591	34.6652
ebi-a-GCST90000514	2	162007430	rs2358016	G	C	0.498113	0.028271	0.00481025	4.17e-09	602604	Gastroesophageal reflux disease || id:ebi-a-GCST90000514	TRUE	reported	igd	34.5419	34.7336
ebi-a-GCST90000514	6	34655000	rs2744961	T	C	0.358437	0.0292007	0.00501549	5.81e-09	602604	Gastroesophageal reflux disease || id:ebi-a-GCST90000514	TRUE	reported	igd	33.8968	34.7411
ebi-a-GCST90000514	6	152235339	rs12204714	T	C	0.632223	-0.028817	0.00499422	7.92e-09	602604	Gastroesophageal reflux disease || id:ebi-a-GCST90000514	TRUE	reported	igd	33.2936	34.7559
ebi-a-GCST90000514	9	134870755	rs4382592	G	T	0.699524	-0.0302679	0.00525091	8.2e-09	602604	Gastroesophageal reflux disease || id:ebi-a-GCST90000514	TRUE	reported	igd	33.2272	34.8012
ebi-a-GCST90000514	11	113286490	rs2734839	T	C	0.606693	-0.0283478	0.00492778	8.79e-09	602604	Gastroesophageal reflux disease || id:ebi-a-GCST90000514	TRUE	reported	igd	33.0929	34.8243
ebi-a-GCST90000514	20	41223062	rs1883842	G	T	0.279255	0.0308332	0.00536826	9.27e-09	602604	Gastroesophageal reflux disease || id:ebi-a-GCST90000514	TRUE	reported	igd	32.989	34.851
ebi-a-GCST90000514	21	34291708	rs2834005	C	T	0.315	0.0296997	0.0051734	9.42e-09	602604	Gastroesophageal reflux disease || id:ebi-a-GCST90000514	TRUE	reported	igd	32.9572	34.8539
ebi-a-GCST90000514	11	76465362	rs7942368	T	C	0.214659	-0.0339683	0.00591917	9.54e-09	602604	Gastroesophageal reflux disease || id:ebi-a-GCST90000514	TRUE	reported	igd	32.9325	34.8554
ebi-a-GCST90000514	3	65653157	rs2016933	G	C	0.730053	-0.0310253	0.00542057	1.04e-08	602604	Gastroesophageal reflux disease || id:ebi-a-GCST90000514	TRUE	reported	igd	32.7598	34.8831
ebi-a-GCST90000514	2	60665768	rs1011407	G	A	0.121628	-0.0420618	0.00735917	1.09e-08	602604	Gastroesophageal reflux disease || id:ebi-a-GCST90000514	TRUE	reported	igd	32.6676	34.9747
ebi-a-GCST90000514	4	3207142	rs7685686	G	A	0.422353	-0.0279222	0.00489191	1.14e-08	602604	Gastroesophageal reflux disease || id:ebi-a-GCST90000514	TRUE	reported	igd	32.5792	34.9844
ebi-a-GCST90000514	22	48875699	rs9615905	T	C	0.458193	0.0275657	0.0048378	1.21e-08	602604	Gastroesophageal reflux disease || id:ebi-a-GCST90000514	TRUE	reported	igd	32.4669	35.0552
ebi-a-GCST90000514	16	82872628	rs7206608	G	C	0.322927	0.0291541	0.005145	1.46e-08	602604	Gastroesophageal reflux disease || id:ebi-a-GCST90000514	TRUE	reported	igd	32.109	35.0872
ebi-a-GCST90000514	6	17023108	rs9396740	A	G	0.248794	-0.031493	0.0055587	1.47e-08	602604	Gastroesophageal reflux disease || id:ebi-a-GCST90000514	TRUE	reported	igd	32.0982	35.091
ebi-a-GCST90000514	1	190957589	rs7541875	G	A	0.426069	0.0273972	0.00484976	1.61e-08	602604	Gastroesophageal reflux disease || id:ebi-a-GCST90000514	TRUE	reported	igd	31.9132	35.1484
ebi-a-GCST90000514	9	122672771	rs7032155	A	C	0.59185	0.02775	0.00491358	1.63e-08	602604	Gastroesophageal reflux disease || id:ebi-a-GCST90000514	TRUE	reported	igd	31.8954	35.1612
ebi-a-GCST90000514	4	80734978	rs7675588	A	C	0.794635	-0.0335228	0.00595438	1.8e-08	602604	Gastroesophageal reflux disease || id:ebi-a-GCST90000514	TRUE	reported	igd	31.6961	35.1673
ebi-a-GCST90000514	2	144257639	rs13409451	G	A	0.392403	-0.0277081	0.00493183	1.93e-08	602604	Gastroesophageal reflux disease || id:ebi-a-GCST90000514	TRUE	reported	igd	31.5643	35.1821
ebi-a-GCST90000514	7	12253880	rs2043539	A	G	0.41866	0.0272058	0.00486485	2.24e-08	602604	Gastroesophageal reflux disease || id:ebi-a-GCST90000514	TRUE	reported	igd	31.2739	35.1907
ebi-a-GCST90000514	6	31465917	rs3828917	T	G	0.041826	0.0671113	0.0120054	2.27e-08	602604	Gastroesophageal reflux disease || id:ebi-a-GCST90000514	TRUE	reported	igd	31.249	35.2213
ebi-a-GCST90000514	9	23737627	rs3793577	G	A	0.538279	0.0270309	0.00484976	2.49e-08	602604	Gastroesophageal reflux disease || id:ebi-a-GCST90000514	TRUE	reported	igd	31.0656	35.2515
ebi-a-GCST90000514	21	46501576	rs2838771	C	G	0.646721	-0.0280984	0.00506571	2.91e-08	602604	Gastroesophageal reflux disease || id:ebi-a-GCST90000514	TRUE	reported	igd	30.7667	35.2561
ebi-a-GCST90000514	2	41704580	rs12997558	A	G	0.358751	0.0278184	0.00502214	3.04e-08	602604	Gastroesophageal reflux disease || id:ebi-a-GCST90000514	TRUE	reported	igd	30.6821	35.325
ebi-a-GCST90000514	12	83969240	rs324769	T	C	0.449179	-0.0267699	0.00483328	3.05e-08	602604	Gastroesophageal reflux disease || id:ebi-a-GCST90000514	TRUE	reported	igd	30.6767	35.3322
ebi-a-GCST90000514	6	33807638	rs4713692	T	C	0.367808	-0.0276128	0.00498634	3.07e-08	602604	Gastroesophageal reflux disease || id:ebi-a-GCST90000514	TRUE	reported	igd	30.6659	35.3648
ebi-a-GCST90000514	5	120144025	rs11953061	T	C	0.338908	0.0281599	0.00508694	3.1e-08	602604	Gastroesophageal reflux disease || id:ebi-a-GCST90000514	TRUE	reported	igd	30.6441	35.3979
ebi-a-GCST90000514	13	66957533	rs9529055	A	G	0.475633	0.0266604	0.00481637	3.11e-08	602604	Gastroesophageal reflux disease || id:ebi-a-GCST90000514	TRUE	reported	igd	30.6402	35.4412
ebi-a-GCST90000514	1	189172684	rs7527682	G	A	0.53725	-0.026684	0.00482174	3.13e-08	602604	Gastroesophageal reflux disease || id:ebi-a-GCST90000514	TRUE	reported	igd	30.6262	35.4968
ebi-a-GCST90000514	3	104624105	rs6780459	T	A	0.746622	0.0305507	0.0055211	3.14e-08	602604	Gastroesophageal reflux disease || id:ebi-a-GCST90000514	TRUE	reported	igd	30.6189	35.5226
ebi-a-GCST90000514	11	38565727	rs10837002	G	C	0.35122	0.0276491	0.00503665	4.03e-08	602604	Gastroesophageal reflux disease || id:ebi-a-GCST90000514	TRUE	reported	igd	30.1354	35.5484
ebi-a-GCST90000514	1	29136686	rs569356	G	A	0.140835	-0.037919	0.00690971	4.07e-08	602604	Gastroesophageal reflux disease || id:ebi-a-GCST90000514	TRUE	reported	igd	30.1157	35.5533
ebi-a-GCST90000514	4	67813017	rs2164300	T	C	0.523279	-0.0264751	0.00482677	4.13e-08	602604	Gastroesophageal reflux disease || id:ebi-a-GCST90000514	TRUE	reported	igd	30.0857	35.56
ebi-a-GCST90000514	1	44013355	rs2782641	A	G	0.612669	0.0270882	0.00494583	4.33e-08	602604	Gastroesophageal reflux disease || id:ebi-a-GCST90000514	TRUE	reported	igd	29.9972	35.5901
ebi-a-GCST90000514	1	201809918	rs903678	A	G	0.339412	0.0277378	0.00508463	4.89e-08	602604	Gastroesophageal reflux disease || id:ebi-a-GCST90000514	TRUE	reported	igd	29.7594	35.6081
ebi-a-GCST90000514	3	35678337	rs7612999	A	G	0.245338	0.0305231	0.00559546	4.9e-08	602604	Gastroesophageal reflux disease || id:ebi-a-GCST90000514	TRUE	reported	igd	29.7567	35.6624
ebi-a-GCST90000514	4	159839313	rs10010963	T	C	0.616433	-0.0269803	0.00494665	4.92e-08	602604	Gastroesophageal reflux disease || id:ebi-a-GCST90000514	TRUE	reported	igd	29.7488	35.6626
id.exposure	chr.exposure	pos.exposure	SNP	effect_allele.exposure	other_allele.exposure	eaf.exposure	beta.exposure	se.exposure	pval.exposure	samplesize.exposure	exposure	mr_keep.exposure	pval_origin.exposure	data_source.exposure	Fz	35.6766
ieu-a-973	6	32570400	rs2516049	C	T	NA	-0.322084	0.0241367	1.35e-49	36000	Ulcerative colitis || id:ieu-a-973	TRUE	reported	igd	NA	35.7071
ieu-a-973	6	139269995	rs10499206	C	T	NA	0.741937	0.0593682	2.38e-42	36000	Ulcerative colitis || id:ieu-a-973	TRUE	reported	igd	NA	35.8236
ieu-a-973	6	102302928	rs9377315	C	G	NA	0.559616	0.043589	2.02e-41	36000	Ulcerative colitis || id:ieu-a-973	TRUE	reported	igd	NA	35.9537
ieu-a-973	18	30747235	rs271461	A	T	NA	0.536493	0.04324	6.97e-38	36000	Ulcerative colitis || id:ieu-a-973	TRUE	reported	igd	NA	35.956
ieu-a-973	1	20171860	rs6426833	A	G	NA	0.262364	0.0196329	3.93e-35	36000	Ulcerative colitis || id:ieu-a-973	TRUE	reported	igd	NA	36.0869
ieu-a-973	12	75068078	rs12303913	T	C	NA	0.524729	0.0467865	3.15e-33	36000	Ulcerative colitis || id:ieu-a-973	TRUE	reported	igd	NA	36.1118
ieu-a-973	5	168610154	rs11740487	A	G	NA	0.625938	0.0666902	1.47e-31	36000	Ulcerative colitis || id:ieu-a-973	TRUE	reported	igd	NA	36.1509
ieu-a-973	6	158066315	rs10499312	G	A	NA	-0.598836	0.0806429	3.6e-30	36000	Ulcerative colitis || id:ieu-a-973	TRUE	reported	igd	NA	36.1724
ieu-a-973	1	67705958	rs11209026	A	G	NA	-0.553885	0.0513392	5.12e-28	36000	Ulcerative colitis || id:ieu-a-973	TRUE	reported	igd	NA	36.2382
ieu-a-973	12	93693515	rs6538407	C	A	NA	0.530628	0.0522435	4.18e-27	36000	Ulcerative colitis || id:ieu-a-973	TRUE	reported	igd	NA	36.2385
ieu-a-973	6	51933179	rs12200541	T	C	NA	0.438255	0.0428921	1.4e-24	36000	Ulcerative colitis || id:ieu-a-973	TRUE	reported	igd	NA	36.2575
ieu-a-973	11	77058659	rs17135576	A	G	NA	0.576613	0.0601332	1.4e-23	36000	Ulcerative colitis || id:ieu-a-973	TRUE	reported	igd	NA	36.2721
ieu-a-973	5	71368999	rs6894569	G	A	NA	0.57098	0.069213	2.61e-23	36000	Ulcerative colitis || id:ieu-a-973	TRUE	reported	igd	NA	36.285
ieu-a-973	10	12267086	rs10906102	T	C	NA	-0.476234	0.0505553	1.3e-22	36000	Ulcerative colitis || id:ieu-a-973	TRUE	reported	igd	NA	36.3777
ieu-a-973	21	40465534	rs2836878	A	G	NA	-0.223144	0.0245086	1.86e-22	36000	Ulcerative colitis || id:ieu-a-973	TRUE	reported	igd	NA	36.5102
ieu-a-973	3	7351373	rs984123	T	C	NA	0.542324	0.059248	2.41e-21	36000	Ulcerative colitis || id:ieu-a-973	TRUE	reported	igd	NA	36.5534
ieu-a-973	8	135520207	rs16905158	G	C	NA	0.667829	0.0756559	1.16e-20	36000	Ulcerative colitis || id:ieu-a-973	TRUE	reported	igd	NA	36.589
ieu-a-973	18	4012453	rs16945863	T	C	NA	-0.438255	0.0757747	2.23e-20	36000	Ulcerative colitis || id:ieu-a-973	TRUE	reported	igd	NA	36.652
ieu-a-973	2	230267912	rs11885200	G	A	NA	0.553885	0.0644811	1.33e-19	36000	Ulcerative colitis || id:ieu-a-973	TRUE	reported	igd	NA	36.6958
ieu-a-973	20	40652287	rs6029933	G	C	NA	0.86289	0.100364	4.07e-19	36000	Ulcerative colitis || id:ieu-a-973	TRUE	reported	igd	NA	36.7509
ieu-a-973	10	77417967	rs7073851	G	A	NA	-0.378436	0.062789	2.17e-18	36000	Ulcerative colitis || id:ieu-a-973	TRUE	reported	igd	NA	36.7639
ieu-a-973	1	161472158	rs10800309	G	A	NA	-0.19062	0.0210948	2.28e-18	36000	Ulcerative colitis || id:ieu-a-973	TRUE	reported	igd	NA	36.9042
ieu-a-973	10	101274058	rs7095491	C	T	NA	-0.182322	0.0192218	3.99e-18	36000	Ulcerative colitis || id:ieu-a-973	TRUE	reported	igd	NA	36.9911
ieu-a-973	14	88217030	rs10148332	T	C	NA	0.438255	0.054342	6.26e-18	36000	Ulcerative colitis || id:ieu-a-973	TRUE	reported	igd	NA	37.073
ieu-a-973	12	83019495	rs11115323	T	C	NA	-0.392042	0.0684347	9.51e-18	36000	Ulcerative colitis || id:ieu-a-973	TRUE	reported	igd	NA	37.0802
ieu-a-973	3	49690496	rs11709525	T	C	NA	0.19062	0.0210948	2.24e-17	36000	Ulcerative colitis || id:ieu-a-973	TRUE	reported	igd	NA	37.1231
ieu-a-973	1	206939904	rs3024505	A	G	NA	0.223144	0.0264486	5.76e-17	36000	Ulcerative colitis || id:ieu-a-973	TRUE	reported	igd	NA	37.1568
ieu-a-973	8	28037987	rs10090868	G	A	NA	-0.378436	0.0471492	2.26e-16	36000	Ulcerative colitis || id:ieu-a-973	TRUE	reported	igd	NA	37.1769
ieu-a-973	16	49755875	rs4785333	A	G	NA	-0.357674	0.0569244	3.69e-16	36000	Ulcerative colitis || id:ieu-a-973	TRUE	reported	igd	NA	37.2326
ieu-a-973	12	68507468	rs11177059	T	C	NA	0.165514	0.0193842	4.16e-16	36000	Ulcerative colitis || id:ieu-a-973	TRUE	reported	igd	NA	37.2746
ieu-a-973	19	39775241	rs7343134	C	T	NA	0.57098	0.0733883	4.32e-16	36000	Ulcerative colitis || id:ieu-a-973	TRUE	reported	igd	NA	37.3217
ieu-a-973	7	107486902	rs10272963	T	C	NA	-0.182322	0.0212708	4.55e-16	36000	Ulcerative colitis || id:ieu-a-973	TRUE	reported	igd	NA	37.341
ieu-a-973	3	138565389	rs11716652	T	C	NA	0.270027	0.0351075	1.66e-15	36000	Ulcerative colitis || id:ieu-a-973	TRUE	reported	igd	NA	37.3539
ieu-a-973	14	98673041	rs8181924	T	C	NA	0.425268	0.0546964	2.12e-15	36000	Ulcerative colitis || id:ieu-a-973	TRUE	reported	igd	NA	37.4262
ieu-a-973	12	94885549	rs3761675	G	A	NA	0.774727	0.106318	4.4e-15	36000	Ulcerative colitis || id:ieu-a-973	TRUE	reported	igd	NA	37.5611
ieu-a-973	2	11692106	rs6737520	C	A	NA	0.476234	0.064709	1.68e-14	36000	Ulcerative colitis || id:ieu-a-973	TRUE	reported	igd	NA	37.6203
ieu-a-973	2	61204856	rs7608910	G	A	NA	0.173953	0.0214498	1.7e-14	36000	Ulcerative colitis || id:ieu-a-973	TRUE	reported	igd	NA	37.6265
ieu-a-973	4	38165290	rs6811401	G	T	NA	0.559616	0.0771864	2.52e-14	36000	Ulcerative colitis || id:ieu-a-973	TRUE	reported	igd	NA	37.6525
ieu-a-973	3	114565212	rs1543247	G	C	NA	-0.385262	0.0604057	7.98e-14	36000	Ulcerative colitis || id:ieu-a-973	TRUE	reported	igd	NA	37.6544
ieu-a-973	1	200877562	rs7554511	A	C	NA	-0.173953	0.0234988	2.04e-13	36000	Ulcerative colitis || id:ieu-a-973	TRUE	reported	igd	NA	37.7078
ieu-a-973	1	6271125	rs1052598	G	A	NA	0.329304	0.0532242	3.33e-13	36000	Ulcerative colitis || id:ieu-a-973	TRUE	reported	igd	NA	37.7448
ieu-a-973	11	93926457	rs16920014	G	T	NA	0.357674	0.0461858	3.92e-13	36000	Ulcerative colitis || id:ieu-a-973	TRUE	reported	igd	NA	37.7533
ieu-a-973	13	78531614	rs11838546	A	G	NA	0.444686	0.0620485	6.17e-13	36000	Ulcerative colitis || id:ieu-a-973	TRUE	reported	igd	NA	37.8439
ieu-a-973	9	139266405	rs10781499	A	G	NA	0.14842	0.0220052	6.95e-13	36000	Ulcerative colitis || id:ieu-a-973	TRUE	reported	igd	NA	37.9314
ieu-a-973	9	4981602	rs10758669	A	C	NA	-0.14842	0.0220052	8.52e-13	36000	Ulcerative colitis || id:ieu-a-973	TRUE	reported	igd	NA	37.9778
ieu-a-973	16	86009740	rs16940186	C	T	NA	0.173953	0.0257464	5.88e-12	36000	Ulcerative colitis || id:ieu-a-973	TRUE	reported	igd	NA	37.9947
ieu-a-973	20	16031257	rs6135656	A	G	NA	0.371564	0.0545587	1.01e-11	36000	Ulcerative colitis || id:ieu-a-973	TRUE	reported	igd	NA	38.0091
ieu-a-973	17	38040763	rs2872507	A	G	NA	0.139762	0.020062	5.44e-11	36000	Ulcerative colitis || id:ieu-a-973	TRUE	reported	igd	NA	38.0111
ieu-a-973	4	106131025	rs949681	A	G	NA	0.398776	0.0630349	7.28e-11	36000	Ulcerative colitis || id:ieu-a-973	TRUE	reported	igd	NA	38.0375
ieu-a-973	2	241579108	rs4676406	T	G	NA	0.131028	0.020239	8.32e-11	36000	Ulcerative colitis || id:ieu-a-973	TRUE	reported	igd	NA	38.0442
ieu-a-973	10	60096814	rs9663811	A	C	NA	0.357674	0.0569244	1.56e-10	36000	Ulcerative colitis || id:ieu-a-973	TRUE	reported	igd	NA	38.0563
ieu-a-973	1	153391729	rs3006414	A	G	NA	0.231112	0.038388	1.83e-10	36000	Ulcerative colitis || id:ieu-a-973	TRUE	reported	igd	NA	38.0862
ieu-a-973	15	40329033	rs2291619	G	A	NA	0.182322	0.0403072	2.38e-10	36000	Ulcerative colitis || id:ieu-a-973	TRUE	reported	igd	NA	38.105
ieu-a-973	11	75709833	rs7107438	C	T	NA	0.329304	0.0585649	3.97e-10	36000	Ulcerative colitis || id:ieu-a-973	TRUE	reported	igd	NA	38.215
ieu-a-973	8	10710199	rs17152619	C	G	NA	0.300105	0.047201	4.44e-10	36000	Ulcerative colitis || id:ieu-a-973	TRUE	reported	igd	NA	38.239
ieu-a-973	7	44612229	rs2289057	A	G	NA	0.357674	0.0641108	7.99e-10	36000	Ulcerative colitis || id:ieu-a-973	TRUE	reported	igd	NA	38.3222
ieu-a-973	11	114387956	rs7117324	A	G	NA	-0.139762	0.0221968	8.04e-10	36000	Ulcerative colitis || id:ieu-a-973	TRUE	reported	igd	NA	38.3476
ieu-a-973	21	19028015	rs9983355	C	T	NA	0.41871	0.0719347	1.03e-09	36000	Ulcerative colitis || id:ieu-a-973	TRUE	reported	igd	NA	38.4268
ieu-a-973	2	104065300	rs7588677	T	C	NA	0.270027	0.0465106	1.2e-09	36000	Ulcerative colitis || id:ieu-a-973	TRUE	reported	igd	NA	38.5157
ieu-a-973	1	2513216	rs734999	T	C	NA	-0.122218	0.020239	1.21e-09	36000	Ulcerative colitis || id:ieu-a-973	TRUE	reported	igd	NA	38.6385
ieu-a-973	2	29667326	rs4408683	A	G	NA	0.182322	0.0403072	1.93e-09	36000	Ulcerative colitis || id:ieu-a-973	TRUE	reported	igd	NA	38.6996
ieu-a-973	14	36468872	rs17103762	T	A	NA	0.405465	0.0709424	2.02e-09	36000	Ulcerative colitis || id:ieu-a-973	TRUE	reported	igd	NA	38.7918
ieu-a-973	7	99435896	rs496000	A	G	NA	0.314811	0.0556769	2.19e-09	36000	Ulcerative colitis || id:ieu-a-973	TRUE	reported	igd	NA	38.793
ieu-a-973	3	78938564	rs17016573	T	G	NA	0.371564	0.0667751	3.43e-09	36000	Ulcerative colitis || id:ieu-a-973	TRUE	reported	igd	NA	38.8344
ieu-a-973	5	2726211	rs2132868	T	C	NA	0.357674	0.0656807	3.53e-09	36000	Ulcerative colitis || id:ieu-a-973	TRUE	reported	igd	NA	38.8579
ieu-a-973	16	75342932	rs10781977	G	A	NA	-0.139762	0.0243138	4.99e-09	36000	Ulcerative colitis || id:ieu-a-973	TRUE	reported	igd	NA	38.8785
ieu-a-973	2	86041681	rs11679814	C	T	NA	0.470004	0.0982286	5.71e-09	36000	Ulcerative colitis || id:ieu-a-973	TRUE	reported	igd	NA	39.0516
ieu-a-973	22	24117916	rs2267029	G	A	NA	0.19062	0.0399741	6.48e-09	36000	Ulcerative colitis || id:ieu-a-973	TRUE	reported	igd	NA	39.2105
ieu-a-973	4	79231933	rs1385133	A	G	NA	0.285179	0.0496536	6.83e-09	36000	Ulcerative colitis || id:ieu-a-973	TRUE	reported	igd	NA	39.3191
ieu-a-973	3	160413079	rs9830968	A	G	NA	0.463734	0.0877314	8.4e-09	36000	Ulcerative colitis || id:ieu-a-973	TRUE	reported	igd	NA	39.3243
ieu-a-973	7	107453103	rs2108225	A	G	NA	-0.122218	0.0204191	8.71e-09	36000	Ulcerative colitis || id:ieu-a-973	TRUE	reported	igd	NA	39.4456
ieu-a-973	2	219010146	rs11676348	T	C	NA	0.122218	0.0204191	8.78e-09	36000	Ulcerative colitis || id:ieu-a-973	TRUE	reported	igd	NA	39.5136
ieu-a-973	11	131398334	rs1543120	G	A	NA	0.223144	0.038695	9.09e-09	36000	Ulcerative colitis || id:ieu-a-973	TRUE	reported	igd	NA	39.6777
ieu-a-973	8	8709322	rs441641	C	A	NA	0.431782	0.0777	1.08e-08	36000	Ulcerative colitis || id:ieu-a-973	TRUE	reported	igd	NA	39.6844
ieu-a-973	10	124840980	rs4262668	G	A	NA	-0.512824	0.0928172	1.11e-08	36000	Ulcerative colitis || id:ieu-a-973	TRUE	reported	igd	NA	39.7009
ieu-a-973	7	2789880	rs798502	C	A	NA	-0.131028	0.0223917	1.21e-08	36000	Ulcerative colitis || id:ieu-a-973	TRUE	reported	igd	NA	39.7093
ieu-a-973	1	8165619	rs7545677	C	T	NA	0.157004	0.0261873	1.42e-08	36000	Ulcerative colitis || id:ieu-a-973	TRUE	reported	igd	NA	39.7581
ieu-a-973	3	6565877	rs10510338	G	A	NA	0.378436	0.0663157	1.52e-08	36000	Ulcerative colitis || id:ieu-a-973	TRUE	reported	igd	NA	39.7913
ieu-a-973	13	27528301	rs17084983	G	A	NA	0.131028	0.0223917	1.61e-08	36000	Ulcerative colitis || id:ieu-a-973	TRUE	reported	igd	NA	39.7961
ieu-a-973	11	80810271	rs17141433	C	G	NA	0.378436	0.0678478	1.63e-08	36000	Ulcerative colitis || id:ieu-a-973	TRUE	reported	igd	NA	39.8963
ieu-a-973	2	199567687	rs6434978	T	C	NA	0.122218	0.0225902	2.11e-08	36000	Ulcerative colitis || id:ieu-a-973	TRUE	reported	igd	NA	39.9252
ieu-a-973	4	16901761	rs1558206	C	T	NA	0.350657	0.0625312	2.38e-08	36000	Ulcerative colitis || id:ieu-a-973	TRUE	reported	igd	NA	40.2784
ieu-a-973	11	1874072	rs907611	A	G	NA	0.122218	0.0225902	2.49e-08	36000	Ulcerative colitis || id:ieu-a-973	TRUE	reported	igd	NA	40.3854
ieu-a-973	5	594083	rs11739663	C	T	NA	-0.139762	0.0266435	2.8e-08	36000	Ulcerative colitis || id:ieu-a-973	TRUE	reported	igd	NA	40.3978
ieu-a-973	21	42875404	rs420737	G	A	NA	0.425268	0.0830159	3.23e-08	36000	Ulcerative colitis || id:ieu-a-973	TRUE	reported	igd	NA	40.4661
ieu-a-973	5	150440097	rs2233287	A	G	NA	0.182322	0.0337818	3.35e-08	36000	Ulcerative colitis || id:ieu-a-973	TRUE	reported	igd	NA	40.4699
ieu-a-973	1	22705665	rs1320601	T	C	NA	-0.262364	0.0490204	3.54e-08	36000	Ulcerative colitis || id:ieu-a-973	TRUE	reported	igd	NA	40.537
ieu-a-973	10	35535695	rs12242110	G	A	NA	0.122218	0.0225902	3.86e-08	36000	Ulcerative colitis || id:ieu-a-973	TRUE	reported	igd	NA	40.55
ieu-a-973	16	68674788	rs6499188	A	G	NA	0.131028	0.0245265	3.97e-08	36000	Ulcerative colitis || id:ieu-a-973	TRUE	reported	igd	NA	40.6243
ieu-a-973	9	117553249	rs4246905	C	T	NA	0.122218	0.0225902	4.77e-08	36000	Ulcerative colitis || id:ieu-a-973	TRUE	reported	igd	NA	40.7936
ieu-a-973	6	31464050	rs6916394	C	T	NA	0.113329	0.0227921	4.86e-08	36000	Ulcerative colitis || id:ieu-a-973	TRUE	reported	igd	NA	40.7975
id.exposure	chr.exposure	pos.exposure	SNP	effect_allele.exposure	other_allele.exposure	eaf.exposure	beta.exposure	se.exposure	pval.exposure	samplesize.exposure	exposure	mr_keep.exposure	pval_origin.exposure	data_source.exposure	Fz	40.8461
ebi-a-GCST005523	6	27783359	rs2747054	G	A	NA	1.0065	0.0261649	1e-200	12041	Celiac disease || id:ebi-a-GCST005523	TRUE	reported	igd	NA	41.0155
ebi-a-GCST005523	6	32682174	rs3104404	A	C	NA	-0.998857	0.0300801	1e-200	12041	Celiac disease || id:ebi-a-GCST005523	TRUE	reported	igd	NA	41.0601
ebi-a-GCST005523	6	33047031	rs1431403	C	T	NA	0.64815	0.0199541	1e-200	12041	Celiac disease || id:ebi-a-GCST005523	TRUE	reported	igd	NA	41.1991
ebi-a-GCST005523	6	31383979	rs6932236	C	T	NA	-0.657008	0.0241975	2.4e-162	12041	Celiac disease || id:ebi-a-GCST005523	TRUE	reported	igd	NA	41.2034
ebi-a-GCST005523	6	31245061	rs2524068	T	G	NA	-0.424189	0.0264813	9.5e-58	12041	Celiac disease || id:ebi-a-GCST005523	TRUE	reported	igd	NA	41.2156
ebi-a-GCST005523	3	188119901	rs2030519	A	G	NA	0.27826	0.0188629	3e-49	12041	Celiac disease || id:ebi-a-GCST005523	TRUE	reported	igd	NA	41.2298
ebi-a-GCST005523	4	123551114	rs13132308	G	A	NA	-0.34899	0.0269131	1.87e-38	12041	Celiac disease || id:ebi-a-GCST005523	TRUE	reported	igd	NA	41.2783
ebi-a-GCST005523	6	138005515	rs17264332	G	A	NA	0.250759	0.0220259	4.98e-30	12041	Celiac disease || id:ebi-a-GCST005523	TRUE	reported	igd	NA	41.3212
ebi-a-GCST005523	6	32819968	rs41549617	A	G	NA	-0.701179	0.0637298	3.72e-28	12041	Celiac disease || id:ebi-a-GCST005523	TRUE	reported	igd	NA	41.3673
ebi-a-GCST005523	3	159637678	rs76830965	A	C	NA	0.307485	0.0283999	2.57e-27	12041	Celiac disease || id:ebi-a-GCST005523	TRUE	reported	igd	NA	41.5539
ebi-a-GCST005523	1	192541021	rs1323292	A	G	NA	0.261754	0.025293	4.23e-25	12041	Celiac disease || id:ebi-a-GCST005523	TRUE	reported	igd	NA	41.5546
ebi-a-GCST005523	12	111884608	rs3184504	C	T	NA	-0.175633	0.0186829	5.42e-21	12041	Celiac disease || id:ebi-a-GCST005523	TRUE	reported	igd	NA	41.6475
ebi-a-GCST005523	3	46378025	rs2097282	T	C	NA	-0.183987	0.0197345	1.13e-20	12041	Celiac disease || id:ebi-a-GCST005523	TRUE	reported	igd	NA	41.6579
ebi-a-GCST005523	6	128293562	rs55743914	T	C	NA	0.187309	0.021237	1.14e-18	12041	Celiac disease || id:ebi-a-GCST005523	TRUE	reported	igd	NA	41.6583
ebi-a-GCST005523	6	30389347	rs75438091	T	C	NA	-0.420985	0.0491012	1e-17	12041	Celiac disease || id:ebi-a-GCST005523	TRUE	reported	igd	NA	41.6672
ebi-a-GCST005523	10	81058027	rs1250552	G	A	NA	-0.154784	0.0185777	7.97e-17	12041	Celiac disease || id:ebi-a-GCST005523	TRUE	reported	igd	NA	41.6825
ebi-a-GCST005523	2	103086770	rs990171	C	A	NA	-0.178146	0.0215135	1.22e-16	12041	Celiac disease || id:ebi-a-GCST005523	TRUE	reported	igd	NA	41.7191
ebi-a-GCST005523	2	182007800	rs1018326	C	T	NA	0.151862	0.0185859	3.06e-16	12041	Celiac disease || id:ebi-a-GCST005523	TRUE	reported	igd	NA	41.7454
ebi-a-GCST005523	2	61186829	rs13003464	G	A	NA	0.153579	0.0188934	4.34e-16	12041	Celiac disease || id:ebi-a-GCST005523	TRUE	reported	igd	NA	41.7575
ebi-a-GCST005523	6	159469574	rs182429	G	A	NA	-0.150143	0.0186583	8.49e-16	12041	Celiac disease || id:ebi-a-GCST005523	TRUE	reported	igd	NA	41.7593
ebi-a-GCST005523	2	204610396	rs1980422	T	C	NA	-0.172271	0.0215795	1.43e-15	12041	Celiac disease || id:ebi-a-GCST005523	TRUE	reported	igd	NA	41.8134
ebi-a-GCST005523	11	128391937	rs61907765	T	C	NA	0.161268	0.0221632	3.43e-13	12041	Celiac disease || id:ebi-a-GCST005523	TRUE	reported	igd	NA	41.8147
ebi-a-GCST005523	1	2539400	rs4445406	C	T	NA	-0.136049	0.0197343	5.42e-12	12041	Celiac disease || id:ebi-a-GCST005523	TRUE	reported	igd	NA	41.927
ebi-a-GCST005523	11	111196858	rs7104791	C	T	NA	-0.14842	0.0221049	1.89e-11	12041	Celiac disease || id:ebi-a-GCST005523	TRUE	reported	igd	NA	42.0116
ebi-a-GCST005523	11	118729456	rs10790269	T	C	NA	0.157239	0.0239751	5.44e-11	12041	Celiac disease || id:ebi-a-GCST005523	TRUE	reported	igd	NA	42.0293
ebi-a-GCST005523	22	21979289	rs4821124	C	T	NA	0.151003	0.0230512	5.72e-11	12041	Celiac disease || id:ebi-a-GCST005523	TRUE	reported	igd	NA	42.0991
ebi-a-GCST005523	1	172681031	rs12068671	C	T	NA	-0.156654	0.0244153	1.4e-10	12041	Celiac disease || id:ebi-a-GCST005523	TRUE	reported	igd	NA	42.1057
ebi-a-GCST005523	18	12843137	rs11875687	C	T	NA	0.159565	0.0250579	1.92e-10	12041	Celiac disease || id:ebi-a-GCST005523	TRUE	reported	igd	NA	42.3011
ebi-a-GCST005523	16	10964118	rs6498114	T	G	NA	-0.131028	0.0211512	5.83e-10	12041	Celiac disease || id:ebi-a-GCST005523	TRUE	reported	igd	NA	42.3932
ebi-a-GCST005523	6	408079	rs1050976	T	C	NA	-0.111043	0.0184718	1.84e-09	12041	Celiac disease || id:ebi-a-GCST005523	TRUE	reported	igd	NA	42.4999
ebi-a-GCST005523	21	43855067	rs1893592	C	A	NA	-0.123864	0.0208749	2.96e-09	12041	Celiac disease || id:ebi-a-GCST005523	TRUE	reported	igd	NA	42.52
ebi-a-GCST005523	15	75096443	rs1378938	C	T	NA	-0.117783	0.0204027	7.79e-09	12041	Celiac disease || id:ebi-a-GCST005523	TRUE	reported	igd	NA	42.5671
ebi-a-GCST005523	2	191913034	rs6715106	G	A	NA	-0.237369	0.0412053	8.38e-09	12041	Celiac disease || id:ebi-a-GCST005523	TRUE	reported	igd	NA	42.6085
ebi-a-GCST005523	3	119123278	rs61579022	A	G	NA	0.107957	0.0188338	9.92e-09	12041	Celiac disease || id:ebi-a-GCST005523	TRUE	reported	igd	NA	42.736
ebi-a-GCST005523	1	172862984	rs11801183	T	C	NA	-0.138343	0.0245229	1.69e-08	12041	Celiac disease || id:ebi-a-GCST005523	TRUE	reported	igd	NA	42.7605
ebi-a-GCST005523	7	37418454	rs79758729	G	A	NA	0.162969	0.0290899	2.12e-08	12041	Celiac disease || id:ebi-a-GCST005523	TRUE	reported	igd	NA	42.7949
ebi-a-GCST005523	10	6392848	rs744254	A	G	NA	0.116421	0.0210172	3.04e-08	12041	Celiac disease || id:ebi-a-GCST005523	TRUE	reported	igd	NA	42.799
ebi-a-GCST005523	14	69259502	rs11851414	C	T	NA	0.120446	0.0220512	4.71e-08	12041	Celiac disease || id:ebi-a-GCST005523	TRUE	reported	igd	NA	43.0413
id.exposure	chr.exposure	pos.exposure	SNP	effect_allele.exposure	other_allele.exposure	eaf.exposure	beta.exposure	se.exposure	pval.exposure	samplesize.exposure	exposure	mr_keep.exposure	pval_origin.exposure	data_source.exposure	Fz	43.3349
ukb-b-6591	6	152235339	rs12204714	T	C	0.632102	0.0292636	0.00223744	4.3e-39	406457	Age first had sexual intercourse || id:ukb-b-6591	TRUE	reported	igd	171.061	43.404
ukb-b-6591	2	60166832	rs6719762	C	T	0.473304	-0.0233857	0.00216422	3.2e-27	406457	Age first had sexual intercourse || id:ukb-b-6591	TRUE	reported	igd	116.76	43.4335
ukb-b-6591	3	85683470	rs9866968	A	G	0.349391	0.0244328	0.00227411	6.3e-27	406457	Age first had sexual intercourse || id:ukb-b-6591	TRUE	reported	igd	115.431	43.4744
ukb-b-6591	1	91193049	rs10922907	T	A	0.549415	0.0224624	0.00217004	4.1e-25	406457	Age first had sexual intercourse || id:ukb-b-6591	TRUE	reported	igd	107.146	43.5729
ukb-b-6591	3	50201924	rs2188151	T	G	0.424889	-0.0222145	0.00218242	2.5e-24	406457	Age first had sexual intercourse || id:ukb-b-6591	TRUE	reported	igd	103.608	43.5973
ukb-b-6591	5	87847273	rs12653396	A	T	0.565389	-0.0219752	0.00219358	1.3e-23	406457	Age first had sexual intercourse || id:ukb-b-6591	TRUE	reported	igd	100.359	43.6544
ukb-b-6591	10	106467853	rs3896224	G	A	0.414575	0.0213629	0.00220715	3.7e-22	406457	Age first had sexual intercourse || id:ukb-b-6591	TRUE	reported	igd	93.6817	43.6762
ukb-b-6591	7	114110568	rs4727799	T	C	0.647272	-0.0208488	0.00225933	2.8e-20	406457	Age first had sexual intercourse || id:ukb-b-6591	TRUE	reported	igd	85.1531	43.6891
ukb-b-6591	2	44842145	rs6744794	G	C	0.623147	-0.0203928	0.00222121	4.3e-20	406457	Age first had sexual intercourse || id:ukb-b-6591	TRUE	reported	igd	84.2893	43.8535
ukb-b-6591	3	88250597	rs9873182	G	C	0.841159	-0.0257397	0.00294454	2.3e-18	406457	Age first had sexual intercourse || id:ukb-b-6591	TRUE	reported	igd	76.4135	43.9265
ukb-b-6591	2	60474600	rs359239	T	C	0.573829	-0.0189754	0.00219147	4.8e-18	406457	Age first had sexual intercourse || id:ukb-b-6591	TRUE	reported	igd	74.9737	43.9504
ukb-b-6591	15	47684280	rs12907546	A	G	0.211749	-0.0228102	0.00264994	7.4e-18	406457	Age first had sexual intercourse || id:ukb-b-6591	TRUE	reported	igd	74.0942	43.9828
ukb-b-6591	6	50615935	rs141547796	A	G	0.082193	0.0334614	0.00395855	2.8e-17	406457	Age first had sexual intercourse || id:ukb-b-6591	TRUE	reported	igd	71.4519	44.1122
ukb-b-6591	8	9487813	rs4075359	C	T	0.625175	0.0188718	0.0022331	2.9e-17	406457	Age first had sexual intercourse || id:ukb-b-6591	TRUE	reported	igd	71.4181	44.1615
ukb-b-6591	3	53773437	rs2612030	C	T	0.838125	0.0242699	0.00293365	1.3e-16	406457	Age first had sexual intercourse || id:ukb-b-6591	TRUE	reported	igd	68.4411	44.1686
ukb-b-6591	7	140144414	rs113367286	T	C	0.278201	0.0198309	0.00241196	2e-16	406457	Age first had sexual intercourse || id:ukb-b-6591	TRUE	reported	igd	67.5993	44.2881
ukb-b-6591	14	103366698	rs7156339	T	C	0.163624	-0.0236699	0.00291707	4.9e-16	406457	Age first had sexual intercourse || id:ukb-b-6591	TRUE	reported	igd	65.8411	44.3197
ukb-b-6591	4	112503872	rs11729080	A	G	0.171149	0.0229745	0.00285872	9.2e-16	406457	Age first had sexual intercourse || id:ukb-b-6591	TRUE	reported	igd	64.5872	44.4156
ukb-b-6591	2	174043233	rs13009008	G	A	0.672296	0.0182638	0.0022916	1.6e-15	406457	Age first had sexual intercourse || id:ukb-b-6591	TRUE	reported	igd	63.5188	44.4164
ukb-b-6591	16	72505534	rs76513770	C	T	0.127724	0.0256106	0.00323446	2.4e-15	406457	Age first had sexual intercourse || id:ukb-b-6591	TRUE	reported	igd	62.6951	44.635
ukb-b-6591	18	77579773	rs7236339	A	G	0.22753	-0.0204944	0.00259028	2.5e-15	406457	Age first had sexual intercourse || id:ukb-b-6591	TRUE	reported	igd	62.6001	44.6673
ukb-b-6591	5	45119647	rs12523398	A	T	0.173891	0.0225484	0.00285708	3e-15	406457	Age first had sexual intercourse || id:ukb-b-6591	TRUE	reported	igd	62.2852	44.6906
ukb-b-6591	3	108036819	rs79269403	A	G	0.230853	0.0202286	0.00256984	3.5e-15	406457	Age first had sexual intercourse || id:ukb-b-6591	TRUE	reported	igd	61.9608	44.8325
ukb-b-6591	1	66481188	rs1392816	T	C	0.387907	0.0175184	0.00222824	3.8e-15	406457	Age first had sexual intercourse || id:ukb-b-6591	TRUE	reported	igd	61.8106	44.9245
ukb-b-6591	16	89645437	rs369230	T	G	0.692409	-0.0184886	0.00235304	3.9e-15	406457	Age first had sexual intercourse || id:ukb-b-6591	TRUE	reported	igd	61.7373	45.2367
ukb-b-6591	7	1966841	rs6978112	T	C	0.411515	-0.0170735	0.00219534	7.4e-15	406457	Age first had sexual intercourse || id:ukb-b-6591	TRUE	reported	igd	60.4838	45.2934
ukb-b-6591	16	24727064	rs7188873	G	A	0.622795	-0.0172874	0.00222805	8.6e-15	406457	Age first had sexual intercourse || id:ukb-b-6591	TRUE	reported	igd	60.2015	45.4286
ukb-b-6591	10	134191005	rs4443996	C	A	0.476487	-0.0167341	0.002167	1.1e-14	406457	Age first had sexual intercourse || id:ukb-b-6591	TRUE	reported	igd	59.6327	45.4476
ukb-b-6591	15	91426560	rs4702	A	G	0.556374	0.0167404	0.00217251	1.3e-14	406457	Age first had sexual intercourse || id:ukb-b-6591	TRUE	reported	igd	59.3753	45.4904
ukb-b-6591	10	97856899	rs11188601	C	T	0.364739	-0.0172077	0.00224022	1.6e-14	406457	Age first had sexual intercourse || id:ukb-b-6591	TRUE	reported	igd	59.0014	45.5102
ukb-b-6591	9	108959330	rs2176337	T	A	0.315293	-0.017784	0.00232203	1.9e-14	406457	Age first had sexual intercourse || id:ukb-b-6591	TRUE	reported	igd	58.6572	45.5498
ukb-b-6591	8	51127054	rs4873133	T	C	0.292431	-0.0180907	0.00237345	2.5e-14	406457	Age first had sexual intercourse || id:ukb-b-6591	TRUE	reported	igd	58.0963	45.7666
ukb-b-6591	6	23446691	rs767943	A	C	0.264898	-0.0186374	0.00246006	3.6e-14	406457	Age first had sexual intercourse || id:ukb-b-6591	TRUE	reported	igd	57.3954	45.8002
ukb-b-6591	14	41059928	rs12147463	A	G	0.193433	-0.020875	0.00275919	3.9e-14	406457	Age first had sexual intercourse || id:ukb-b-6591	TRUE	reported	igd	57.2384	45.8039
ukb-b-6591	5	154890837	rs1295220	T	C	0.25348	-0.0186416	0.00248775	6.7e-14	406457	Age first had sexual intercourse || id:ukb-b-6591	TRUE	reported	igd	56.1501	45.8387
ukb-b-6591	17	47440466	rs16948048	G	A	0.36754	-0.0166924	0.00223927	9e-14	406457	Age first had sexual intercourse || id:ukb-b-6591	TRUE	reported	igd	55.5677	45.8403
ukb-b-6591	2	63238346	rs2553041	C	G	0.196229	0.0202801	0.00272704	1e-13	406457	Age first had sexual intercourse || id:ukb-b-6591	TRUE	reported	igd	55.3038	45.8978
ukb-b-6591	1	44349405	rs803679	A	G	0.792617	0.0197133	0.0026525	1.1e-13	406457	Age first had sexual intercourse || id:ukb-b-6591	TRUE	reported	igd	55.2339	45.9143
ukb-b-6591	6	67536056	rs72887338	C	T	0.386847	-0.0164161	0.0022168	1.3e-13	406457	Age first had sexual intercourse || id:ukb-b-6591	TRUE	reported	igd	54.8384	45.9247
ukb-b-6591	2	104057364	rs1368546	C	T	0.55706	0.015985	0.00216603	1.6e-13	406457	Age first had sexual intercourse || id:ukb-b-6591	TRUE	reported	igd	54.4621	46.0648
ukb-b-6591	7	31330785	rs35851551	G	A	0.101404	-0.0264733	0.00360571	2.1e-13	406457	Age first had sexual intercourse || id:ukb-b-6591	TRUE	reported	igd	53.9054	46.1453
ukb-b-6591	14	98537128	rs710297	G	C	0.415981	-0.0159588	0.00218986	3.2e-13	406457	Age first had sexual intercourse || id:ukb-b-6591	TRUE	reported	igd	53.1087	46.1985
ukb-b-6591	11	112827715	rs4937872	G	A	0.407721	-0.0160337	0.0022087	3.9e-13	406457	Age first had sexual intercourse || id:ukb-b-6591	TRUE	reported	igd	52.6977	46.2428
ukb-b-6591	2	225377574	rs6748341	G	C	0.316337	0.0167655	0.00232362	5.4e-13	406457	Age first had sexual intercourse || id:ukb-b-6591	TRUE	reported	igd	52.0596	46.2548
ukb-b-6591	2	22558973	rs57537843	A	G	0.381196	-0.0160011	0.00222247	6e-13	406457	Age first had sexual intercourse || id:ukb-b-6591	TRUE	reported	igd	51.8353	46.297
ukb-b-6591	2	157109930	rs1226414	T	A	0.505107	0.0155399	0.00215833	6e-13	406457	Age first had sexual intercourse || id:ukb-b-6591	TRUE	reported	igd	51.8392	46.4431
ukb-b-6591	11	43865501	rs4755749	G	A	0.403067	0.0157811	0.00219972	7.3e-13	406457	Age first had sexual intercourse || id:ukb-b-6591	TRUE	reported	igd	51.468	46.4494
ukb-b-6591	12	56474379	rs3741499	C	T	0.649467	-0.0161594	0.00226011	8.7e-13	406457	Age first had sexual intercourse || id:ukb-b-6591	TRUE	reported	igd	51.1198	46.4673
ukb-b-6591	7	75147801	rs794375	C	T	0.42645	0.0155464	0.00219208	1.3e-12	406457	Age first had sexual intercourse || id:ukb-b-6591	TRUE	reported	igd	50.2973	46.5654
ukb-b-6591	14	47367434	rs3007104	A	G	0.42401	-0.0154973	0.00218798	1.4e-12	406457	Age first had sexual intercourse || id:ukb-b-6591	TRUE	reported	igd	50.1676	46.6213
ukb-b-6591	4	140906390	rs12505942	C	T	0.342778	0.0160611	0.00227551	1.7e-12	406457	Age first had sexual intercourse || id:ukb-b-6591	TRUE	reported	igd	49.8185	46.6356
ukb-b-6591	4	28710551	rs702	T	A	0.838619	0.0205228	0.00293386	2.6e-12	406457	Age first had sexual intercourse || id:ukb-b-6591	TRUE	reported	igd	48.9319	46.7177
ukb-b-6591	6	101129067	rs239190	T	C	0.532174	0.0151426	0.00216441	2.6e-12	406457	Age first had sexual intercourse || id:ukb-b-6591	TRUE	reported	igd	48.9463	46.7518
ukb-b-6591	7	3424686	rs7785195	A	G	0.659377	0.0158783	0.00227544	3e-12	406457	Age first had sexual intercourse || id:ukb-b-6591	TRUE	reported	igd	48.694	46.9048
ukb-b-6591	7	99119110	rs7804551	G	A	0.15369	0.0208069	0.00298824	3.3e-12	406457	Age first had sexual intercourse || id:ukb-b-6591	TRUE	reported	igd	48.4821	46.919
ukb-b-6591	5	24921398	rs435538	G	C	0.230492	-0.0178171	0.00255912	3.4e-12	406457	Age first had sexual intercourse || id:ukb-b-6591	TRUE	reported	igd	48.472	46.9887
ukb-b-6591	9	134881443	rs7025089	A	C	0.680645	0.0160854	0.00231339	3.6e-12	406457	Age first had sexual intercourse || id:ukb-b-6591	TRUE	reported	igd	48.3464	47.0046
ukb-b-6591	11	127449675	rs10750367	G	A	0.554253	-0.0152168	0.00218878	3.6e-12	406457	Age first had sexual intercourse || id:ukb-b-6591	TRUE	reported	igd	48.3326	47.1449
ukb-b-6591	10	10922977	rs2093623	A	G	0.496285	0.0150008	0.00217668	5.5e-12	406457	Age first had sexual intercourse || id:ukb-b-6591	TRUE	reported	igd	47.4939	47.1938
ukb-b-6591	18	50023859	rs12970816	A	G	0.395202	-0.0152412	0.00221166	5.5e-12	406457	Age first had sexual intercourse || id:ukb-b-6591	TRUE	reported	igd	47.4897	47.2692
ukb-b-6591	2	100835032	rs11123817	T	C	0.401206	0.0150766	0.00219576	6.6e-12	406457	Age first had sexual intercourse || id:ukb-b-6591	TRUE	reported	igd	47.1449	47.3299
ukb-b-6591	1	75316394	rs77214504	T	A	0.047379	0.0348552	0.00508475	7.1e-12	406457	Age first had sexual intercourse || id:ukb-b-6591	TRUE	reported	igd	46.9887	47.4897
ukb-b-6591	10	118778079	rs10886022	C	A	0.763037	0.0177217	0.00258759	7.5e-12	406457	Age first had sexual intercourse || id:ukb-b-6591	TRUE	reported	igd	46.9048	47.4939
ukb-b-6591	2	144153344	rs10496949	C	G	0.578036	0.0149311	0.00218449	8.2e-12	406457	Age first had sexual intercourse || id:ukb-b-6591	TRUE	reported	igd	46.7177	47.5916
ukb-b-6591	12	84052203	rs1391075	C	A	0.643432	-0.0153773	0.00225175	8.5e-12	406457	Age first had sexual intercourse || id:ukb-b-6591	TRUE	reported	igd	46.6356	47.6392
ukb-b-6591	11	105850090	rs3758790	G	A	0.359414	0.0153546	0.00225012	8.9e-12	406457	Age first had sexual intercourse || id:ukb-b-6591	TRUE	reported	igd	46.5654	47.6547
ukb-b-6591	14	93826672	rs8003519	G	A	0.581483	-0.0149416	0.00219233	9.4e-12	406457	Age first had sexual intercourse || id:ukb-b-6591	TRUE	reported	igd	46.4494	47.6795
ukb-b-6591	3	17315758	rs2084572	G	A	0.450207	0.014725	0.00216537	1e-11	406457	Age first had sexual intercourse || id:ukb-b-6591	TRUE	reported	igd	46.2428	47.8735
ukb-b-6591	11	12870969	rs6486065	G	T	0.708967	0.0161936	0.00237994	1e-11	406457	Age first had sexual intercourse || id:ukb-b-6591	TRUE	reported	igd	46.297	48.2274
ukb-b-6591	5	167411400	rs12523097	C	T	0.297727	-0.0160994	0.00237205	1.1e-11	406457	Age first had sexual intercourse || id:ukb-b-6591	TRUE	reported	igd	46.0648	48.2296
ukb-b-6591	16	720986	rs1139897	A	G	0.223525	0.0175687	0.00259324	1.2e-11	406457	Age first had sexual intercourse || id:ukb-b-6591	TRUE	reported	igd	45.8978	48.3326
ukb-b-6591	1	153797015	rs112780312	A	G	0.275094	-0.0165258	0.00244083	1.3e-11	406457	Age first had sexual intercourse || id:ukb-b-6591	TRUE	reported	igd	45.8403	48.3464
ukb-b-6591	13	59492828	rs9538248	A	C	0.320928	-0.0156218	0.00230917	1.3e-11	406457	Age first had sexual intercourse || id:ukb-b-6591	TRUE	reported	igd	45.7666	48.472
ukb-b-6591	18	50600552	rs9964201	A	C	0.082656	0.0264901	0.00392756	1.5e-11	406457	Age first had sexual intercourse || id:ukb-b-6591	TRUE	reported	igd	45.4904	48.4821
ukb-b-6591	12	23238326	rs112633616	C	A	0.033261	0.0403127	0.00606962	3.1e-11	406457	Age first had sexual intercourse || id:ukb-b-6591	TRUE	reported	igd	44.1122	48.5609
ukb-b-6591	5	60030791	rs7381195	A	T	0.611957	-0.014635	0.00221414	3.8e-11	406457	Age first had sexual intercourse || id:ukb-b-6591	TRUE	reported	igd	43.6891	48.6869
ukb-b-6591	8	97829917	rs4735438	T	C	0.587017	-0.0144891	0.00219239	3.9e-11	406457	Age first had sexual intercourse || id:ukb-b-6591	TRUE	reported	igd	43.6762	48.694
ukb-b-6591	13	69332015	rs2174752	T	G	0.45124	-0.0143345	0.00216954	3.9e-11	406457	Age first had sexual intercourse || id:ukb-b-6591	TRUE	reported	igd	43.6544	48.9018
ukb-b-6591	15	83240293	rs783544	C	A	0.750616	0.0164657	0.00249373	4e-11	406457	Age first had sexual intercourse || id:ukb-b-6591	TRUE	reported	igd	43.5973	48.9319
ukb-b-6591	8	87680112	rs7815125	A	T	0.826612	0.0187851	0.00284902	4.3e-11	406457	Age first had sexual intercourse || id:ukb-b-6591	TRUE	reported	igd	43.4744	48.9463
ukb-b-6591	18	53403228	rs784255	T	G	0.475487	-0.0142825	0.00216716	4.4e-11	406457	Age first had sexual intercourse || id:ukb-b-6591	TRUE	reported	igd	43.4335	49.1445
ukb-b-6591	19	36252494	rs807478	G	A	0.497201	0.0142362	0.00216259	4.6e-11	406457	Age first had sexual intercourse || id:ukb-b-6591	TRUE	reported	igd	43.3349	49.3859
ukb-b-6591	2	212698718	rs714393	T	C	0.456816	0.0141564	0.00216389	6.1e-11	406457	Age first had sexual intercourse || id:ukb-b-6591	TRUE	reported	igd	42.799	49.6476
ukb-b-6591	7	32962089	rs12701263	T	C	0.400041	0.0144102	0.00220279	6.1e-11	406457	Age first had sexual intercourse || id:ukb-b-6591	TRUE	reported	igd	42.7949	49.6609
ukb-b-6591	7	21417556	rs62439690	A	G	0.262405	-0.0162081	0.00247933	6.3e-11	406457	Age first had sexual intercourse || id:ukb-b-6591	TRUE	reported	igd	42.736	49.6686
ukb-b-6591	6	125061384	rs9491228	C	T	0.528945	-0.0141344	0.00216535	6.7e-11	406457	Age first had sexual intercourse || id:ukb-b-6591	TRUE	reported	igd	42.6085	49.8185
ukb-b-6591	3	35775115	rs67723420	A	T	0.376012	0.0145464	0.00223412	7.5e-11	406457	Age first had sexual intercourse || id:ukb-b-6591	TRUE	reported	igd	42.3932	49.8952
ukb-b-6591	3	3726156	rs9809849	A	G	0.425234	-0.0141765	0.0021849	8.7e-11	406457	Age first had sexual intercourse || id:ukb-b-6591	TRUE	reported	igd	42.0991	49.9859
ukb-b-6591	13	60399045	rs341521	A	G	0.702818	-0.0152941	0.00237256	1.1e-10	406457	Age first had sexual intercourse || id:ukb-b-6591	TRUE	reported	igd	41.5539	50.1676
ukb-b-6591	6	26327953	rs6939048	A	G	0.627277	0.0143527	0.00223278	1.3e-10	406457	Age first had sexual intercourse || id:ukb-b-6591	TRUE	reported	igd	41.3212	50.1701
ukb-b-6591	8	42455166	rs2974311	A	G	0.497467	0.0138488	0.00215715	1.4e-10	406457	Age first had sexual intercourse || id:ukb-b-6591	TRUE	reported	igd	41.2156	50.2174
ukb-b-6591	10	63233988	rs10994777	A	G	0.161939	0.0188266	0.0029331	1.4e-10	406457	Age first had sexual intercourse || id:ukb-b-6591	TRUE	reported	igd	41.1991	50.2973
ukb-b-6591	14	93885198	rs10144067	T	C	0.591023	-0.0141806	0.00221301	1.5e-10	406457	Age first had sexual intercourse || id:ukb-b-6591	TRUE	reported	igd	41.0601	50.3178
ukb-b-6591	3	54156724	rs115882849	A	G	0.152996	-0.0191877	0.00300418	1.7e-10	406457	Age first had sexual intercourse || id:ukb-b-6591	TRUE	reported	igd	40.7936	50.4713
ukb-b-6591	5	106936435	rs2406374	T	C	0.314035	0.0147643	0.00231855	1.9e-10	406457	Age first had sexual intercourse || id:ukb-b-6591	TRUE	reported	igd	40.55	50.5845
ukb-b-6591	2	630075	rs73139123	T	C	0.818479	-0.0181285	0.00284967	2e-10	406457	Age first had sexual intercourse || id:ukb-b-6591	TRUE	reported	igd	40.4699	50.6784
ukb-b-6591	10	104628873	rs7085104	G	A	0.328663	-0.0146038	0.00229572	2e-10	406457	Age first had sexual intercourse || id:ukb-b-6591	TRUE	reported	igd	40.4661	50.7136
ukb-b-6591	2	140342288	rs838039	A	G	0.686798	0.0147669	0.00232368	2.1e-10	406457	Age first had sexual intercourse || id:ukb-b-6591	TRUE	reported	igd	40.3854	51.0722
ukb-b-6591	7	133055603	rs6973256	T	C	0.59757	0.0141037	0.00221898	2.1e-10	406457	Age first had sexual intercourse || id:ukb-b-6591	TRUE	reported	igd	40.3978	51.1198
ukb-b-6591	9	23357826	rs7868984	C	T	0.415886	0.0138367	0.00219061	2.7e-10	406457	Age first had sexual intercourse || id:ukb-b-6591	TRUE	reported	igd	39.8963	51.2258
ukb-b-6591	6	52951766	rs2744450	G	A	0.802128	0.017081	0.00270781	2.8e-10	406457	Age first had sexual intercourse || id:ukb-b-6591	TRUE	reported	igd	39.7913	51.4467
ukb-b-6591	1	88829969	rs1156981	G	A	0.901596	-0.0227567	0.00361129	2.9e-10	406457	Age first had sexual intercourse || id:ukb-b-6591	TRUE	reported	igd	39.7093	51.468
ukb-b-6591	1	110612925	rs2274568	A	G	0.580677	-0.0137862	0.00218862	3e-10	406457	Age first had sexual intercourse || id:ukb-b-6591	TRUE	reported	igd	39.6777	51.6685
ukb-b-6591	2	32858637	rs4952343	G	A	0.446361	0.0138227	0.00219423	3e-10	406457	Age first had sexual intercourse || id:ukb-b-6591	TRUE	reported	igd	39.6844	51.8353
ukb-b-6591	7	105084671	rs13307225	A	G	0.893236	0.0221154	0.00350989	3e-10	406457	Age first had sexual intercourse || id:ukb-b-6591	TRUE	reported	igd	39.7009	51.8392
ukb-b-6591	5	124228322	rs62370848	C	A	0.198707	0.0170776	0.00272348	3.6e-10	406457	Age first had sexual intercourse || id:ukb-b-6591	TRUE	reported	igd	39.3191	52.0596
ukb-b-6591	18	39316544	rs16975243	C	A	0.112803	0.0214265	0.0034168	3.6e-10	406457	Age first had sexual intercourse || id:ukb-b-6591	TRUE	reported	igd	39.3243	52.1099
ukb-b-6591	4	67879681	rs1383722	G	A	0.777899	0.016261	0.00259684	3.8e-10	406457	Age first had sexual intercourse || id:ukb-b-6591	TRUE	reported	igd	39.2105	52.4289
ukb-b-6591	2	26940294	rs12468863	T	C	0.517874	0.0135539	0.00216892	4.1e-10	406457	Age first had sexual intercourse || id:ukb-b-6591	TRUE	reported	igd	39.0516	52.4817
ukb-b-6591	9	86224419	rs13289229	T	G	0.178174	0.0178001	0.00285474	4.5e-10	406457	Age first had sexual intercourse || id:ukb-b-6591	TRUE	reported	igd	38.8785	52.6977
ukb-b-6591	3	74936132	rs6549670	G	A	0.83866	-0.0182814	0.00293516	4.7e-10	406457	Age first had sexual intercourse || id:ukb-b-6591	TRUE	reported	igd	38.793	52.8202
ukb-b-6591	2	185915324	rs75082770	G	A	0.037667	-0.0352385	0.00569853	6.3e-10	406457	Age first had sexual intercourse || id:ukb-b-6591	TRUE	reported	igd	38.239	53.1087
ukb-b-6591	2	45062249	rs62134195	T	C	0.040972	0.033951	0.00550485	6.9e-10	406457	Age first had sexual intercourse || id:ukb-b-6591	TRUE	reported	igd	38.0375	53.194
ukb-b-6591	20	31099311	rs159428	C	T	0.526473	-0.0133188	0.00216122	7.2e-10	406457	Age first had sexual intercourse || id:ukb-b-6591	TRUE	reported	igd	37.9778	53.7294
ukb-b-6591	12	41905897	rs10880088	T	C	0.216086	0.0161646	0.00263079	8e-10	406457	Age first had sexual intercourse || id:ukb-b-6591	TRUE	reported	igd	37.7533	53.9054
ukb-b-6591	2	184416610	rs56306056	A	G	0.214739	0.0160763	0.00262104	8.6e-10	406457	Age first had sexual intercourse || id:ukb-b-6591	TRUE	reported	igd	37.6203	53.9771
ukb-b-6591	3	131968209	rs56392241	C	A	0.393183	-0.0135943	0.0022162	8.6e-10	406457	Age first had sexual intercourse || id:ukb-b-6591	TRUE	reported	igd	37.6265	54.2353
ukb-b-6591	10	9968483	rs7911962	T	C	0.384406	0.0135852	0.00222867	1.1e-09	406457	Age first had sexual intercourse || id:ukb-b-6591	TRUE	reported	igd	37.1568	54.3554
ukb-b-6591	14	58797953	rs10137475	A	G	0.577345	0.0132976	0.00218374	1.1e-09	406457	Age first had sexual intercourse || id:ukb-b-6591	TRUE	reported	igd	37.0802	54.4599
ukb-b-6591	18	42722340	rs35128508	A	G	0.273405	0.0146939	0.00242383	1.3e-09	406457	Age first had sexual intercourse || id:ukb-b-6591	TRUE	reported	igd	36.7509	54.4621
ukb-b-6591	8	116842110	rs800532	G	A	0.776043	-0.0156462	0.00258941	1.5e-09	406457	Age first had sexual intercourse || id:ukb-b-6591	TRUE	reported	igd	36.5102	54.5841
ukb-b-6591	10	134039132	rs2130893	C	G	0.285354	0.0149124	0.00246651	1.5e-09	406457	Age first had sexual intercourse || id:ukb-b-6591	TRUE	reported	igd	36.5534	54.8384
ukb-b-6591	16	75608786	rs75501781	G	C	0.056072	0.0283951	0.00469426	1.5e-09	406457	Age first had sexual intercourse || id:ukb-b-6591	TRUE	reported	igd	36.589	54.9978
ukb-b-6591	7	135221170	rs6966898	T	C	0.333033	-0.0138863	0.00230233	1.6e-09	406457	Age first had sexual intercourse || id:ukb-b-6591	TRUE	reported	igd	36.3777	55.0318
ukb-b-6591	8	115396892	rs182353	T	C	0.468089	-0.013024	0.00216294	1.7e-09	406457	Age first had sexual intercourse || id:ukb-b-6591	TRUE	reported	igd	36.2575	55.0946
ukb-b-6591	16	5825579	rs9923553	G	A	0.290128	-0.0143033	0.00237602	1.7e-09	406457	Age first had sexual intercourse || id:ukb-b-6591	TRUE	reported	igd	36.2385	55.2339
ukb-b-6591	11	79883503	rs12795483	G	A	0.518144	0.0129681	0.00216666	2.2e-09	406457	Age first had sexual intercourse || id:ukb-b-6591	TRUE	reported	igd	35.8236	55.3038
ukb-b-6591	4	25408838	rs34811474	A	G	0.2308	0.015285	0.00255792	2.3e-09	406457	Age first had sexual intercourse || id:ukb-b-6591	TRUE	reported	igd	35.7071	55.3556
ukb-b-6591	20	62440700	rs6011138	C	T	0.13593	0.0188511	0.00315668	2.3e-09	406457	Age first had sexual intercourse || id:ukb-b-6591	TRUE	reported	igd	35.6624	55.5677
ukb-b-6591	3	117474457	rs4602427	G	C	0.803857	-0.0162149	0.0027194	2.5e-09	406457	Age first had sexual intercourse || id:ukb-b-6591	TRUE	reported	igd	35.5533	55.6377
ukb-b-6591	5	46004640	rs113338260	C	T	0.215732	-0.0156495	0.00262476	2.5e-09	406457	Age first had sexual intercourse || id:ukb-b-6591	TRUE	reported	igd	35.5484	56.1501
ukb-b-6591	12	24195419	rs12826060	G	T	0.412502	-0.0130686	0.00219153	2.5e-09	406457	Age first had sexual intercourse || id:ukb-b-6591	TRUE	reported	igd	35.56	56.6479
ukb-b-6591	11	46342834	rs7476	C	A	0.312212	-0.0139275	0.00233764	2.6e-09	406457	Age first had sexual intercourse || id:ukb-b-6591	TRUE	reported	igd	35.4968	56.8475
ukb-b-6591	1	78450517	rs34517439	A	C	0.121862	-0.0197888	0.00333274	2.9e-09	406457	Age first had sexual intercourse || id:ukb-b-6591	TRUE	reported	igd	35.2561	56.9032
ukb-b-6591	13	97130945	rs71433405	T	C	0.066007	0.0261044	0.00440193	3e-09	406457	Age first had sexual intercourse || id:ukb-b-6591	TRUE	reported	igd	35.1673	56.9378
ukb-b-6591	13	28109961	rs75783371	C	T	0.139303	0.018662	0.00315196	3.2e-09	406457	Age first had sexual intercourse || id:ukb-b-6591	TRUE	reported	igd	35.0552	57.0564
ukb-b-6591	17	77793292	rs9904818	C	G	0.090226	0.0223466	0.00377862	3.3e-09	406457	Age first had sexual intercourse || id:ukb-b-6591	TRUE	reported	igd	34.9747	57.1704
ukb-b-6591	9	96381765	rs7857266	T	C	0.395169	0.0131398	0.00222736	3.7e-09	406457	Age first had sexual intercourse || id:ukb-b-6591	TRUE	reported	igd	34.8012	57.2384
ukb-b-6591	1	7524974	rs6692613	T	C	0.530087	-0.012697	0.00216093	4.2e-09	406457	Age first had sexual intercourse || id:ukb-b-6591	TRUE	reported	igd	34.5238	57.3954
ukb-b-6591	11	28676170	rs11030402	G	A	0.368192	0.0131312	0.00223892	4.5e-09	406457	Age first had sexual intercourse || id:ukb-b-6591	TRUE	reported	igd	34.3977	58.0021
ukb-b-6591	18	22647270	rs4800204	T	C	0.570335	-0.0127969	0.00218287	4.6e-09	406457	Age first had sexual intercourse || id:ukb-b-6591	TRUE	reported	igd	34.3678	58.0963
ukb-b-6591	9	16347927	rs4961705	C	G	0.348007	0.0134658	0.00230266	5e-09	406457	Age first had sexual intercourse || id:ukb-b-6591	TRUE	reported	igd	34.1981	58.3449
ukb-b-6591	5	167757575	rs72822625	A	G	0.094583	0.0215117	0.00368811	5.5e-09	406457	Age first had sexual intercourse || id:ukb-b-6591	TRUE	reported	igd	34.0204	58.6572
ukb-b-6591	8	95489281	rs72674824	C	T	0.24179	0.0147127	0.002525	5.6e-09	406457	Age first had sexual intercourse || id:ukb-b-6591	TRUE	reported	igd	33.9516	58.8893
ukb-b-6591	20	31925189	rs293736	C	A	0.722176	-0.0140549	0.00241272	5.7e-09	406457	Age first had sexual intercourse || id:ukb-b-6591	TRUE	reported	igd	33.9343	59.0014
ukb-b-6591	4	60736871	rs12511982	A	G	0.550535	0.0126559	0.00217493	5.9e-09	406457	Age first had sexual intercourse || id:ukb-b-6591	TRUE	reported	igd	33.8605	59.3753
ukb-b-6591	8	73889570	rs10104523	C	T	0.522362	-0.0125544	0.00216093	6.3e-09	406457	Age first had sexual intercourse || id:ukb-b-6591	TRUE	reported	igd	33.7527	59.5077
ukb-b-6591	9	14140575	rs2382440	C	G	0.155948	-0.0173228	0.0029817	6.3e-09	406457	Age first had sexual intercourse || id:ukb-b-6591	TRUE	reported	igd	33.7525	59.6327
ukb-b-6591	17	65988049	rs9891146	C	T	0.734943	0.0142035	0.00244483	6.3e-09	406457	Age first had sexual intercourse || id:ukb-b-6591	TRUE	reported	igd	33.7514	59.7511
ukb-b-6591	3	24908376	rs34606772	T	C	0.416265	-0.0127837	0.00220229	6.4e-09	406457	Age first had sexual intercourse || id:ukb-b-6591	TRUE	reported	igd	33.6947	59.8433
ukb-b-6591	19	5066330	rs2613765	A	G	0.473384	0.01255	0.00216222	6.5e-09	406457	Age first had sexual intercourse || id:ukb-b-6591	TRUE	reported	igd	33.6888	60.1858
ukb-b-6591	3	118457615	rs705240	T	C	0.184196	-0.0160808	0.00277714	7e-09	406457	Age first had sexual intercourse || id:ukb-b-6591	TRUE	reported	igd	33.5288	60.2015
ukb-b-6591	7	32265007	rs10233473	T	C	0.252363	-0.0144439	0.00249914	7.5e-09	406457	Age first had sexual intercourse || id:ukb-b-6591	TRUE	reported	igd	33.403	60.213
ukb-b-6591	3	60884616	rs6763967	A	G	0.264904	-0.0140945	0.00244253	7.9e-09	406457	Age first had sexual intercourse || id:ukb-b-6591	TRUE	reported	igd	33.2979	60.4838
ukb-b-6591	11	27681596	rs11030102	G	C	0.261081	-0.0141577	0.00245584	8.2e-09	406457	Age first had sexual intercourse || id:ukb-b-6591	TRUE	reported	igd	33.234	61.5213
ukb-b-6591	17	5621920	rs2535593	C	T	0.460207	0.0125197	0.00217263	8.3e-09	406457	Age first had sexual intercourse || id:ukb-b-6591	TRUE	reported	igd	33.2058	61.7373
ukb-b-6591	21	31422507	rs8133065	G	C	0.283251	0.013895	0.00241406	8.6e-09	406457	Age first had sexual intercourse || id:ukb-b-6591	TRUE	reported	igd	33.1298	61.7823
ukb-b-6591	10	11205224	rs7909331	G	A	0.164505	-0.0167017	0.00290726	9.2e-09	406457	Age first had sexual intercourse || id:ukb-b-6591	TRUE	reported	igd	33.0029	61.8106
ukb-b-6591	7	118299289	rs4730883	A	C	0.508458	0.0124212	0.0021659	9.8e-09	406457	Age first had sexual intercourse || id:ukb-b-6591	TRUE	reported	igd	32.8888	61.9608
ukb-b-6591	1	204903874	rs2625223	T	C	0.48174	0.0124972	0.00218318	1e-08	406457	Age first had sexual intercourse || id:ukb-b-6591	TRUE	reported	igd	32.7676	62.2852
ukb-b-6591	8	54396376	rs1585634	C	G	0.802142	-0.0155686	0.00272036	1e-08	406457	Age first had sexual intercourse || id:ukb-b-6591	TRUE	reported	igd	32.7525	62.4011
ukb-b-6591	9	124602728	rs9886840	G	A	0.580117	0.0125283	0.0021869	1e-08	406457	Age first had sexual intercourse || id:ukb-b-6591	TRUE	reported	igd	32.8189	62.6001
ukb-b-6591	5	155844242	rs7729019	T	C	0.613575	0.0126365	0.0022139	1.1e-08	406457	Age first had sexual intercourse || id:ukb-b-6591	TRUE	reported	igd	32.5788	62.6135
ukb-b-6591	8	143419130	rs74583305	T	C	0.020359	0.0437545	0.00766429	1.1e-08	406457	Age first had sexual intercourse || id:ukb-b-6591	TRUE	reported	igd	32.5911	62.6951
ukb-b-6591	5	76938952	rs1000586	C	T	0.356215	-0.0129893	0.00227885	1.2e-08	406457	Age first had sexual intercourse || id:ukb-b-6591	TRUE	reported	igd	32.4891	62.7365
ukb-b-6591	6	164427025	rs206005	T	A	0.760199	-0.0144473	0.00253165	1.2e-08	406457	Age first had sexual intercourse || id:ukb-b-6591	TRUE	reported	igd	32.566	62.7869
ukb-b-6591	13	55678332	rs9536961	G	A	0.348212	0.0130856	0.00229334	1.2e-08	406457	Age first had sexual intercourse || id:ukb-b-6591	TRUE	reported	igd	32.5573	63.5188
ukb-b-6591	16	12639850	rs10492794	T	C	0.178188	0.0161576	0.00283198	1.2e-08	406457	Age first had sexual intercourse || id:ukb-b-6591	TRUE	reported	igd	32.5515	64.1215
ukb-b-6591	1	112284581	rs1812249	A	G	0.215227	-0.0148834	0.00262062	1.4e-08	406457	Age first had sexual intercourse || id:ukb-b-6591	TRUE	reported	igd	32.2548	64.1806
ukb-b-6591	4	2675893	rs17164088	G	A	0.422075	-0.012374	0.0021824	1.4e-08	406457	Age first had sexual intercourse || id:ukb-b-6591	TRUE	reported	igd	32.1477	64.5872
ukb-b-6591	7	116417848	rs11770163	C	G	0.331573	-0.0130247	0.0022936	1.4e-08	406457	Age first had sexual intercourse || id:ukb-b-6591	TRUE	reported	igd	32.2476	65.366
ukb-b-6591	1	204587047	rs11588857	A	G	0.209057	0.0150007	0.00264784	1.5e-08	406457	Age first had sexual intercourse || id:ukb-b-6591	TRUE	reported	igd	32.095	65.4988
ukb-b-6591	1	234740880	rs1329125	T	C	0.32713	-0.0130877	0.00230935	1.5e-08	406457	Age first had sexual intercourse || id:ukb-b-6591	TRUE	reported	igd	32.1177	65.8124
ukb-b-6591	2	142247852	rs55659265	A	G	0.066555	-0.0244268	0.0043179	1.5e-08	406457	Age first had sexual intercourse || id:ukb-b-6591	TRUE	reported	igd	32.0026	65.8411
ukb-b-6591	2	157233542	rs298247	C	G	0.167472	0.016312	0.00288227	1.5e-08	406457	Age first had sexual intercourse || id:ukb-b-6591	TRUE	reported	igd	32.029	65.8589
ukb-b-6591	2	174212894	rs1550623	A	G	0.831598	-0.0163761	0.00289186	1.5e-08	406457	Age first had sexual intercourse || id:ukb-b-6591	TRUE	reported	igd	32.0674	67.5993
ukb-b-6591	6	105265993	rs72996415	C	T	0.064661	0.0254579	0.0044961	1.5e-08	406457	Age first had sexual intercourse || id:ukb-b-6591	TRUE	reported	igd	32.0606	67.6185
ukb-b-6591	22	30126644	rs140098	C	T	0.547765	-0.0123554	0.00218166	1.5e-08	406457	Age first had sexual intercourse || id:ukb-b-6591	TRUE	reported	igd	32.0728	67.7221
ukb-b-6591	2	201171207	rs12614621	C	G	0.427043	-0.0122771	0.00217607	1.7e-08	406457	Age first had sexual intercourse || id:ukb-b-6591	TRUE	reported	igd	31.8305	68.4411
ukb-b-6591	15	97495941	rs7167444	T	G	0.253197	-0.0141521	0.00251088	1.7e-08	406457	Age first had sexual intercourse || id:ukb-b-6591	TRUE	reported	igd	31.7678	68.8203
ukb-b-6591	1	96175101	rs1931263	T	G	0.4895	-0.0121295	0.00215544	1.8e-08	406457	Age first had sexual intercourse || id:ukb-b-6591	TRUE	reported	igd	31.6674	68.8796
ukb-b-6591	18	36921851	rs8096225	C	A	0.694761	-0.0132106	0.00234688	1.8e-08	406457	Age first had sexual intercourse || id:ukb-b-6591	TRUE	reported	igd	31.6855	68.9897
ukb-b-6591	21	40512129	rs6517512	G	A	0.955633	-0.029508	0.00524367	1.8e-08	406457	Age first had sexual intercourse || id:ukb-b-6591	TRUE	reported	igd	31.667	69.0533
ukb-b-6591	16	49622284	rs12448731	T	C	0.141723	-0.0174598	0.00310836	1.9e-08	406457	Age first had sexual intercourse || id:ukb-b-6591	TRUE	reported	igd	31.551	69.7277
ukb-b-6591	2	86471782	rs35408390	T	C	0.44275	-0.0121304	0.00216917	2.2e-08	406457	Age first had sexual intercourse || id:ukb-b-6591	TRUE	reported	igd	31.2724	70.3338
ukb-b-6591	7	153524115	rs12671608	C	T	0.139057	-0.017507	0.00313092	2.2e-08	406457	Age first had sexual intercourse || id:ukb-b-6591	TRUE	reported	igd	31.2664	70.3479
ukb-b-6591	10	120008097	rs11198323	A	G	0.167819	0.0161931	0.00289584	2.2e-08	406457	Age first had sexual intercourse || id:ukb-b-6591	TRUE	reported	igd	31.2686	71.4181
ukb-b-6591	19	51132746	rs61746970	A	G	0.039278	-0.0316935	0.00568006	2.4e-08	406457	Age first had sexual intercourse || id:ukb-b-6591	TRUE	reported	igd	31.1338	71.4519
ukb-b-6591	8	36842153	rs1547351	A	T	0.410447	0.0122226	0.00219383	2.5e-08	406457	Age first had sexual intercourse || id:ukb-b-6591	TRUE	reported	igd	31.0398	71.5298
ukb-b-6591	12	102476087	rs11111153	C	A	0.245107	-0.0139553	0.00250685	2.6e-08	406457	Age first had sexual intercourse || id:ukb-b-6591	TRUE	reported	igd	30.9899	71.786
ukb-b-6591	19	32951800	rs4805761	G	A	0.843347	0.0165446	0.00297366	2.6e-08	406457	Age first had sexual intercourse || id:ukb-b-6591	TRUE	reported	igd	30.9548	71.8654
ukb-b-6591	2	213841704	rs79231171	A	C	0.077097	0.0224426	0.00403721	2.7e-08	406457	Age first had sexual intercourse || id:ukb-b-6591	TRUE	reported	igd	30.9016	71.8933
ukb-b-6591	3	94038085	rs1454687	G	C	0.514884	0.0119775	0.00215579	2.8e-08	406457	Age first had sexual intercourse || id:ukb-b-6591	TRUE	reported	igd	30.8686	72.1136
ukb-b-6591	2	162101261	rs11678980	A	G	0.461083	-0.0123757	0.00223207	2.9e-08	406457	Age first had sexual intercourse || id:ukb-b-6591	TRUE	reported	igd	30.7413	74.0868
ukb-b-6591	2	198880378	rs976179	T	A	0.485183	-0.0119687	0.00215899	3e-08	406457	Age first had sexual intercourse || id:ukb-b-6591	TRUE	reported	igd	30.732	74.0942
ukb-b-6591	1	151597660	rs1891588	C	G	0.552814	-0.0119638	0.00216512	3.3e-08	406457	Age first had sexual intercourse || id:ukb-b-6591	TRUE	reported	igd	30.5332	74.1602
ukb-b-6591	9	99161512	rs2025151	G	C	0.196133	0.0150046	0.00271665	3.3e-08	406457	Age first had sexual intercourse || id:ukb-b-6591	TRUE	reported	igd	30.5056	74.3315
ukb-b-6591	13	107644422	rs9514600	G	C	0.502126	-0.0119302	0.00216113	3.4e-08	406457	Age first had sexual intercourse || id:ukb-b-6591	TRUE	reported	igd	30.4741	74.5358
ukb-b-6591	5	103972357	rs30266	A	G	0.328425	-0.012649	0.00229698	3.7e-08	406457	Age first had sexual intercourse || id:ukb-b-6591	TRUE	reported	igd	30.3247	74.7566
ukb-b-6591	7	1299334	rs6966769	G	A	0.11444	0.0185136	0.00339345	4.9e-08	406457	Age first had sexual intercourse || id:ukb-b-6591	TRUE	reported	igd	29.7644	74.9737
id.exposure	chr.exposure	pos.exposure	SNP	effect_allele.exposure	other_allele.exposure	eaf.exposure	beta.exposure	se.exposure	pval.exposure	samplesize.exposure	exposure	mr_keep.exposure	pval_origin.exposure	data_source.exposure	Fz	76.4135
ukb-a-351	11	30226528	rs11031006	A	G	0.143581	0.13515	0.0102396	1.15e-39	30245	Length of menstrual cycle || id:ukb-a-351	TRUE	reported	igd	174.196	76.7392
ukb-a-351	8	25248615	rs13261573	A	G	0.249164	0.0560627	0.00832995	1.72e-11	30245	Length of menstrual cycle || id:ukb-a-351	TRUE	reported	igd	45.2934	78.4358
ukb-a-351	1	199891438	rs6670899	A	C	0.397193	0.0480518	0.00743688	1.05e-10	30245	Length of menstrual cycle || id:ukb-a-351	TRUE	reported	igd	41.7454	79.7051
ukb-a-351	2	227781150	rs10186145	G	A	0.508797	0.0445272	0.00729297	1.04e-09	30245	Length of menstrual cycle || id:ukb-a-351	TRUE	reported	igd	37.2746	80.0807
ukb-a-351	11	2146053	rs4929958	C	T	0.723951	-0.0453302	0.00812928	2.48e-08	30245	Length of menstrual cycle || id:ukb-a-351	TRUE	reported	igd	31.0916	84.2893
ukb-a-351	15	67378033	rs11856909	G	A	0.595153	0.040376	0.00739517	4.8e-08	30245	Length of menstrual cycle || id:ukb-a-351	TRUE	reported	igd	29.8072	84.4704
id.exposure	chr.exposure	pos.exposure	SNP	effect_allele.exposure	other_allele.exposure	eaf.exposure	beta.exposure	se.exposure	pval.exposure	samplesize.exposure	exposure	mr_keep.exposure	pval_origin.exposure	data_source.exposure	Fz	84.8125
ukb-a-34	16	53800954	rs1421085	C	T	0.40212	0.0488502	0.00169324	8.51e-183	331693	Comparative body size at age 10 || id:ukb-a-34	TRUE	reported	igd	832.325	85.1524
ukb-a-34	1	177889480	rs543874	G	A	0.207808	0.0468917	0.00204595	3.68e-116	331693	Comparative body size at age 10 || id:ukb-a-34	TRUE	reported	igd	525.29	85.1531
ukb-a-34	2	25156773	rs2384054	C	T	0.489674	0.0353752	0.00166026	1.14e-100	331693	Comparative body size at age 10 || id:ukb-a-34	TRUE	reported	igd	453.987	85.8447
ukb-a-34	2	417167	rs62106258	C	T	0.0484669	-0.0791645	0.00386899	5.44e-93	331693	Comparative body size at age 10 || id:ukb-a-34	TRUE	reported	igd	418.662	86.1013
ukb-a-34	2	632609	rs13022337	G	A	0.828643	0.042476	0.00220196	7.22e-83	331693	Comparative body size at age 10 || id:ukb-a-34	TRUE	reported	igd	372.105	86.2046
ukb-a-34	12	50263148	rs7132908	A	G	0.38392	0.0328258	0.00170966	4.09e-82	331693	Comparative body size at age 10 || id:ukb-a-34	TRUE	reported	igd	368.645	91.3467
ukb-a-34	18	57838401	rs663129	A	G	0.234384	0.0345655	0.00195923	1.25e-69	331693	Comparative body size at age 10 || id:ukb-a-34	TRUE	reported	igd	311.252	93.6817
ukb-a-34	1	74997762	rs12042908	G	A	0.562344	-0.0275971	0.00167687	7.83e-61	331693	Comparative body size at age 10 || id:ukb-a-34	TRUE	reported	igd	270.848	96.0286
ukb-a-34	4	45182527	rs10938397	G	A	0.434075	0.0219615	0.00168077	5.25e-39	331693	Comparative body size at age 10 || id:ukb-a-34	TRUE	reported	igd	170.728	97.1352
ukb-a-34	16	19941557	rs55880046	G	T	0.14233	-0.0305008	0.00238099	1.47e-37	331693	Comparative body size at age 10 || id:ukb-a-34	TRUE	reported	igd	164.099	98.6276
ukb-a-34	6	50803050	rs987237	G	A	0.178318	0.0263923	0.00217346	6.35e-34	331693	Comparative body size at age 10 || id:ukb-a-34	TRUE	reported	igd	147.451	100.359
ukb-a-34	2	207066474	rs115319174	C	G	0.0577374	0.0437848	0.00360978	7.5e-34	331693	Comparative body size at age 10 || id:ukb-a-34	TRUE	reported	igd	147.124	103.608
ukb-a-34	15	68066729	rs28626095	C	T	0.222587	-0.0223313	0.00199548	4.57e-29	331693	Comparative body size at age 10 || id:ukb-a-34	TRUE	reported	igd	125.236	106.5
ukb-a-34	16	4024128	rs34033929	T	C	0.596687	0.0180875	0.00171787	6.41e-26	331693	Comparative body size at age 10 || id:ukb-a-34	TRUE	reported	igd	110.86	107.146
ukb-a-34	1	72742387	rs34020954	T	C	0.200886	-0.0217878	0.00207936	1.1e-25	331693	Comparative body size at age 10 || id:ukb-a-34	TRUE	reported	igd	109.791	109.791
ukb-a-34	8	76878957	rs2126474	T	G	0.413168	-0.017427	0.00168868	5.78e-25	331693	Comparative body size at age 10 || id:ukb-a-34	TRUE	reported	igd	106.5	110.86
ukb-a-34	1	110082886	rs7550711	T	C	0.0259328	0.0517132	0.00524701	6.52e-23	331693	Comparative body size at age 10 || id:ukb-a-34	TRUE	reported	igd	97.1352	115.431
ukb-a-34	13	54107583	rs9568868	T	G	0.129002	0.0230407	0.00249687	2.78e-20	331693	Comparative body size at age 10 || id:ukb-a-34	TRUE	reported	igd	85.1524	115.865
ukb-a-34	18	58157767	rs113728099	A	G	0.0252714	-0.0476762	0.00532766	3.61e-19	331693	Comparative body size at age 10 || id:ukb-a-34	TRUE	reported	igd	80.0807	116.76
ukb-a-34	6	30931844	rs3131934	C	T	0.172372	0.0196857	0.00220499	4.37e-19	331693	Comparative body size at age 10 || id:ukb-a-34	TRUE	reported	igd	79.7051	123.278
ukb-a-34	11	47611152	rs11039307	T	C	0.408314	0.0147919	0.00168855	1.96e-18	331693	Comparative body size at age 10 || id:ukb-a-34	TRUE	reported	igd	76.7392	125.236
ukb-a-34	3	85792137	rs7355953	C	T	0.21342	0.0175647	0.00203149	5.35e-18	331693	Comparative body size at age 10 || id:ukb-a-34	TRUE	reported	igd	74.7566	142.927
ukb-a-34	9	96343060	rs10821163	C	G	0.343053	0.0151658	0.00176195	7.51e-18	331693	Comparative body size at age 10 || id:ukb-a-34	TRUE	reported	igd	74.0868	147.124
ukb-a-34	6	100727703	rs34260097	G	T	0.225481	0.0168787	0.0019876	2.04e-17	331693	Comparative body size at age 10 || id:ukb-a-34	TRUE	reported	igd	72.1136	147.451
ukb-a-34	4	102708997	rs7377083	A	C	0.431316	0.014327	0.0016897	2.28e-17	331693	Comparative body size at age 10 || id:ukb-a-34	TRUE	reported	igd	71.8933	164.099
ukb-a-34	13	28612886	rs2504235	G	A	0.638613	-0.0146591	0.00173016	2.41e-17	331693	Comparative body size at age 10 || id:ukb-a-34	TRUE	reported	igd	71.786	167.596
ukb-a-34	11	27728102	rs11030119	A	G	0.308813	0.0152258	0.00180026	2.74e-17	331693	Comparative body size at age 10 || id:ukb-a-34	TRUE	reported	igd	71.5298	168.248
ukb-a-34	19	47569003	rs3810291	A	G	0.677478	0.0149059	0.00177718	4.99e-17	331693	Comparative body size at age 10 || id:ukb-a-34	TRUE	reported	igd	70.3479	170.728
ukb-a-34	7	93206613	rs982692	C	T	0.361064	0.0143468	0.0017294	1.08e-16	331693	Comparative body size at age 10 || id:ukb-a-34	TRUE	reported	igd	68.8203	171.061
ukb-a-34	12	49507127	rs7978659	T	G	0.342761	0.0144162	0.00175314	1.99e-16	331693	Comparative body size at age 10 || id:ukb-a-34	TRUE	reported	igd	67.6185	174.196
ukb-a-34	6	51243035	rs1775255	T	G	0.479201	0.0135259	0.00166729	4.98e-16	331693	Comparative body size at age 10 || id:ukb-a-34	TRUE	reported	igd	65.8124	214.635
ukb-a-34	2	142299735	rs1384660	A	G	0.184775	-0.0171564	0.00214251	1.17e-15	331693	Comparative body size at age 10 || id:ukb-a-34	TRUE	reported	igd	64.1215	224.897
ukb-a-34	3	61221102	rs77771121	T	A	0.154137	-0.0182597	0.0023044	2.31e-15	331693	Comparative body size at age 10 || id:ukb-a-34	TRUE	reported	igd	62.7869	270.848
ukb-a-34	18	45921214	rs7239114	A	G	0.542958	0.0133079	0.00168015	2.37e-15	331693	Comparative body size at age 10 || id:ukb-a-34	TRUE	reported	igd	62.7365	306.344
ukb-a-34	12	991306	rs55726687	A	G	0.211138	0.0159718	0.00203629	4.39e-15	331693	Comparative body size at age 10 || id:ukb-a-34	TRUE	reported	igd	61.5213	311.252
ukb-a-34	7	93270791	rs2528544	T	G	0.410393	0.0131057	0.00168932	8.65e-15	331693	Comparative body size at age 10 || id:ukb-a-34	TRUE	reported	igd	60.1858	368.645
ukb-a-34	1	62579891	rs12140153	T	G	0.0967607	-0.0223179	0.00288499	1.03e-14	331693	Comparative body size at age 10 || id:ukb-a-34	TRUE	reported	igd	59.8433	372.105
ukb-a-34	3	11278211	rs347617	T	C	0.670829	-0.0136798	0.00177334	1.22e-14	331693	Comparative body size at age 10 || id:ukb-a-34	TRUE	reported	igd	59.5077	418.662
ukb-a-34	5	153535857	rs1346482	A	G	0.53319	-0.0127621	0.00166304	1.67e-14	331693	Comparative body size at age 10 || id:ukb-a-34	TRUE	reported	igd	58.8893	453.987
ukb-a-34	16	28913787	rs7189927	C	T	0.64393	-0.0131039	0.00173479	4.24e-14	331693	Comparative body size at age 10 || id:ukb-a-34	TRUE	reported	igd	57.0564	525.29
ukb-a-34	20	15813475	rs16996644	G	C	0.127612	0.0188365	0.00249631	4.51e-14	331693	Comparative body size at age 10 || id:ukb-a-34	TRUE	reported	igd	56.9378	832.325
ukb-a-34	8	64804804	rs13254613	C	A	0.344832	0.0132085	0.00175099	4.59e-14	331693	Comparative body size at age 10 || id:ukb-a-34	TRUE	reported	igd	56.9032	Fz
ukb-a-34	5	63932508	rs9291816	T	C	0.324522	-0.0133863	0.00177543	4.72e-14	331693	Comparative body size at age 10 || id:ukb-a-34	TRUE	reported	igd	56.8475	Fz
ukb-a-34	6	154332947	rs1294093	G	A	0.302956	-0.0136451	0.00181294	5.23e-14	331693	Comparative body size at age 10 || id:ukb-a-34	TRUE	reported	igd	56.6479	Fz
ukb-a-34	3	85766025	rs9835772	T	A	0.242763	0.0144162	0.00193762	1.01e-13	331693	Comparative body size at age 10 || id:ukb-a-34	TRUE	reported	igd	55.3556	Fz
ukb-a-34	8	9979535	rs13256357	T	C	0.202489	0.0153863	0.0020729	1.15e-13	331693	Comparative body size at age 10 || id:ukb-a-34	TRUE	reported	igd	55.0946	Fz
ukb-a-34	2	77225361	rs12713889	C	T	0.329676	-0.0131199	0.00176857	1.19e-13	331693	Comparative body size at age 10 || id:ukb-a-34	TRUE	reported	igd	55.0318	Fz
ukb-a-34	13	40784814	rs1336486	G	T	0.3288	0.013122	0.0017694	1.21e-13	331693	Comparative body size at age 10 || id:ukb-a-34	TRUE	reported	igd	54.9978	Fz
ukb-a-34	17	2149425	rs1555569	C	A	0.344841	-0.0129092	0.00174729	1.49e-13	331693	Comparative body size at age 10 || id:ukb-a-34	TRUE	reported	igd	54.5841	Fz
ukb-a-34	4	30837846	rs13141110	A	G	0.407747	0.0124745	0.001692	1.68e-13	331693	Comparative body size at age 10 || id:ukb-a-34	TRUE	reported	igd	54.3554	Fz
ukb-a-34	13	79580919	rs1441264	A	G	0.591866	0.012722	0.00172748	1.78e-13	331693	Comparative body size at age 10 || id:ukb-a-34	TRUE	reported	igd	54.2353	Fz
ukb-a-34	1	65991203	rs2767486	G	A	0.20053	0.0151105	0.00207911	3.66e-13	331693	Comparative body size at age 10 || id:ukb-a-34	TRUE	reported	igd	52.8202	Fz
ukb-a-34	22	40708679	rs2072858	C	T	0.351908	-0.012627	0.00174299	4.35e-13	331693	Comparative body size at age 10 || id:ukb-a-34	TRUE	reported	igd	52.4817	NA
ukb-a-34	11	68357368	rs10896348	C	T	0.277766	-0.0134117	0.00185224	4.47e-13	331693	Comparative body size at age 10 || id:ukb-a-34	TRUE	reported	igd	52.4289	NA
ukb-a-34	13	66205228	rs1333010	A	G	0.608556	-0.0123021	0.00170419	5.26e-13	331693	Comparative body size at age 10 || id:ukb-a-34	TRUE	reported	igd	52.1099	NA
ukb-a-34	16	81730582	rs11642090	C	T	0.374986	0.0124334	0.00172972	6.58e-13	331693	Comparative body size at age 10 || id:ukb-a-34	TRUE	reported	igd	51.6685	NA
ukb-a-34	16	67434917	rs34229857	T	C	0.0293491	0.0352339	0.00492283	8.25e-13	331693	Comparative body size at age 10 || id:ukb-a-34	TRUE	reported	igd	51.2258	NA
ukb-a-34	10	2666859	rs7084503	C	T	0.506738	-0.0119383	0.00167051	8.92e-13	331693	Comparative body size at age 10 || id:ukb-a-34	TRUE	reported	igd	51.0722	NA
ukb-a-34	6	10020243	rs201237	G	A	0.345609	-0.012382	0.00174728	1.38e-12	331693	Comparative body size at age 10 || id:ukb-a-34	TRUE	reported	igd	50.2174	NA
ukb-a-34	14	30500472	rs61980365	A	C	0.0385336	0.0306916	0.00433307	1.41e-12	331693	Comparative body size at age 10 || id:ukb-a-34	TRUE	reported	igd	50.1701	NA
ukb-a-34	6	55106920	rs62416801	A	G	0.276524	-0.0131061	0.00185965	1.82e-12	331693	Comparative body size at age 10 || id:ukb-a-34	TRUE	reported	igd	49.6686	NA
ukb-a-34	17	78757626	rs11150745	G	A	0.319489	-0.0125105	0.00178458	2.38e-12	331693	Comparative body size at age 10 || id:ukb-a-34	TRUE	reported	igd	49.1445	NA
ukb-a-34	10	102447647	rs41310284	A	C	0.101545	-0.0192901	0.00276815	3.21e-12	331693	Comparative body size at age 10 || id:ukb-a-34	TRUE	reported	igd	48.5609	NA
ukb-a-34	16	30877636	rs4889631	A	G	0.798214	-0.0143632	0.00207588	4.55e-12	331693	Comparative body size at age 10 || id:ukb-a-34	TRUE	reported	igd	47.8735	NA
ukb-a-34	9	98607989	rs2149564	T	G	0.481695	-0.0115003	0.00166549	5.03e-12	331693	Comparative body size at age 10 || id:ukb-a-34	TRUE	reported	igd	47.6795	NA
ukb-a-34	7	24306230	rs6972277	A	G	0.635807	-0.0119396	0.00172956	5.09e-12	331693	Comparative body size at age 10 || id:ukb-a-34	TRUE	reported	igd	47.6547	NA
ukb-a-34	20	54420996	rs6014536	T	C	0.247281	-0.0132741	0.00192946	6.01e-12	331693	Comparative body size at age 10 || id:ukb-a-34	TRUE	reported	igd	47.3299	NA
ukb-a-34	17	47448346	rs12952581	A	G	0.363275	0.0119084	0.00173206	6.2e-12	331693	Comparative body size at age 10 || id:ukb-a-34	TRUE	reported	igd	47.2692	NA
ukb-a-34	4	82137639	rs788860	A	T	0.294396	-0.0125491	0.00183038	7.1e-12	331693	Comparative body size at age 10 || id:ukb-a-34	TRUE	reported	igd	47.0046	NA
ukb-a-34	5	87598818	rs2115885	A	G	0.204422	-0.0141472	0.00207537	9.33e-12	331693	Comparative body size at age 10 || id:ukb-a-34	TRUE	reported	igd	46.4673	NA
ukb-a-34	14	79943927	rs4899746	G	A	0.630298	0.0117428	0.0017266	1.04e-11	331693	Comparative body size at age 10 || id:ukb-a-34	TRUE	reported	igd	46.2548	NA
ukb-a-34	15	100692953	rs72755233	A	G	0.112887	0.0178251	0.00262402	1.1e-11	331693	Comparative body size at age 10 || id:ukb-a-34	TRUE	reported	igd	46.1453	NA
ukb-a-34	1	6649228	rs2229330	G	T	0.0718419	0.0217515	0.00321406	1.31e-11	331693	Comparative body size at age 10 || id:ukb-a-34	TRUE	reported	igd	45.8002	NA
ukb-a-34	3	131616345	rs11920002	T	C	0.0701915	-0.0220199	0.00326632	1.57e-11	331693	Comparative body size at age 10 || id:ukb-a-34	TRUE	reported	igd	45.4476	NA
ukb-a-34	9	27822531	rs1935354	C	T	0.484337	0.0112381	0.00166735	1.58e-11	331693	Comparative body size at age 10 || id:ukb-a-34	TRUE	reported	igd	45.4286	NA
ukb-a-34	7	127850795	rs4731419	T	C	0.581465	0.0114054	0.00170715	2.38e-11	331693	Comparative body size at age 10 || id:ukb-a-34	TRUE	reported	igd	44.635	NA
ukb-a-34	13	28018370	rs4771121	A	G	0.276057	-0.0124474	0.00186973	2.79e-11	331693	Comparative body size at age 10 || id:ukb-a-34	TRUE	reported	igd	44.3197	NA
ukb-a-34	12	57648644	rs78607331	T	C	0.0454183	0.0265347	0.00398721	2.84e-11	331693	Comparative body size at age 10 || id:ukb-a-34	TRUE	reported	igd	44.2881	NA
ukb-a-34	20	6613051	rs2024962	A	G	0.438894	0.0111828	0.00168278	3.03e-11	331693	Comparative body size at age 10 || id:ukb-a-34	TRUE	reported	igd	44.1615	NA
ukb-a-34	9	130446836	rs117911387	A	G	0.0466698	0.0261287	0.00393981	3.32e-11	331693	Comparative body size at age 10 || id:ukb-a-34	TRUE	reported	igd	43.9828	NA
ukb-a-34	11	65640562	rs2303385	A	G	0.639677	-0.0113326	0.00172737	5.37e-11	331693	Comparative body size at age 10 || id:ukb-a-34	TRUE	reported	igd	43.0413	NA
ukb-a-34	21	40309436	rs13047416	G	C	0.375427	-0.0112598	0.0017219	6.2e-11	331693	Comparative body size at age 10 || id:ukb-a-34	TRUE	reported	igd	42.7605	NA
ukb-a-34	9	120404878	rs12001083	T	C	0.329948	-0.0114794	0.00177106	9.08e-11	331693	Comparative body size at age 10 || id:ukb-a-34	TRUE	reported	igd	42.0116	NA
ukb-a-34	11	69466737	rs678653	G	C	0.636098	0.0111501	0.0017336	1.26e-10	331693	Comparative body size at age 10 || id:ukb-a-34	TRUE	reported	igd	41.3673	NA
ukb-a-34	8	4138427	rs2656288	A	G	0.708856	-0.0117143	0.0018379	1.85e-10	331693	Comparative body size at age 10 || id:ukb-a-34	TRUE	reported	igd	40.6243	NA
ukb-a-34	17	34904985	rs12601380	C	A	0.412618	-0.0107128	0.00168258	1.93e-10	331693	Comparative body size at age 10 || id:ukb-a-34	TRUE	reported	igd	40.537	NA
ukb-a-34	16	85335951	rs11641362	T	G	0.326903	-0.0112768	0.00177684	2.2e-10	331693	Comparative body size at age 10 || id:ukb-a-34	TRUE	reported	igd	40.2784	NA
ukb-a-34	6	141473363	rs1452991	A	G	0.371715	0.0109216	0.00173127	2.82e-10	331693	Comparative body size at age 10 || id:ukb-a-34	TRUE	reported	igd	39.7961	NA
ukb-a-34	3	141209594	rs79147413	G	A	0.0666016	0.0207922	0.00333549	4.56e-10	331693	Comparative body size at age 10 || id:ukb-a-34	TRUE	reported	igd	38.8579	NA
ukb-a-34	3	48170802	rs2034963	C	G	0.648697	-0.0108814	0.00175536	5.69e-10	331693	Comparative body size at age 10 || id:ukb-a-34	TRUE	reported	igd	38.4268	NA
ukb-a-34	11	28642653	rs4636654	A	G	0.394404	-0.0105245	0.00170494	6.71e-10	331693	Comparative body size at age 10 || id:ukb-a-34	TRUE	reported	igd	38.105	NA
ukb-a-34	3	138094766	rs1212469	G	A	0.810207	-0.0130599	0.00211619	6.78e-10	331693	Comparative body size at age 10 || id:ukb-a-34	TRUE	reported	igd	38.0862	NA
ukb-a-34	2	25489349	rs11690500	C	T	0.179665	-0.0134517	0.00218183	7.04e-10	331693	Comparative body size at age 10 || id:ukb-a-34	TRUE	reported	igd	38.0111	NA
ukb-a-34	19	18500722	rs16982345	A	G	0.250741	0.0118064	0.00191919	7.67e-10	331693	Comparative body size at age 10 || id:ukb-a-34	TRUE	reported	igd	37.8439	NA
ukb-a-34	12	11855624	rs2187642	C	A	0.623274	0.0105314	0.00171502	8.23e-10	331693	Comparative body size at age 10 || id:ukb-a-34	TRUE	reported	igd	37.7078	NA
ukb-a-34	9	6968603	rs818902	A	C	0.683414	-0.0110058	0.00179359	8.46e-10	331693	Comparative body size at age 10 || id:ukb-a-34	TRUE	reported	igd	37.6525	NA
ukb-a-34	17	44191483	rs11653367	G	A	0.325763	-0.0109114	0.00178037	8.87e-10	331693	Comparative body size at age 10 || id:ukb-a-34	TRUE	reported	igd	37.5611	NA
ukb-a-34	18	946727	rs11662628	C	T	0.584119	0.0103326	0.00169089	9.93e-10	331693	Comparative body size at age 10 || id:ukb-a-34	TRUE	reported	igd	37.341	NA
ukb-a-34	12	103736499	rs12817542	T	C	0.0607875	0.0212359	0.00347607	1e-09	331693	Comparative body size at age 10 || id:ukb-a-34	TRUE	reported	igd	37.3217	NA
ukb-a-34	13	59181858	rs9527850	A	G	0.248512	0.0118081	0.00193516	1.05e-09	331693	Comparative body size at age 10 || id:ukb-a-34	TRUE	reported	igd	37.2326	NA
ukb-a-34	12	118399491	rs7305424	T	A	0.340501	0.0107312	0.00175999	1.08e-09	331693	Comparative body size at age 10 || id:ukb-a-34	TRUE	reported	igd	37.1769	NA
ukb-a-34	2	119633581	rs58741371	C	T	0.198314	-0.0128566	0.00211386	1.19e-09	331693	Comparative body size at age 10 || id:ukb-a-34	TRUE	reported	igd	36.9911	NA
ukb-a-34	7	77829768	rs1852006	A	G	0.356006	-0.0105408	0.00173514	1.24e-09	331693	Comparative body size at age 10 || id:ukb-a-34	TRUE	reported	igd	36.9042	NA
ukb-a-34	14	33306123	rs7142718	C	G	0.486097	0.0100952	0.0016665	1.38e-09	331693	Comparative body size at age 10 || id:ukb-a-34	TRUE	reported	igd	36.6958	NA
ukb-a-34	1	205782718	rs9438393	G	A	0.415765	-0.010174	0.00168899	1.71e-09	331693	Comparative body size at age 10 || id:ukb-a-34	TRUE	reported	igd	36.285	NA
ukb-a-34	17	29494693	rs2953016	G	C	0.78784	-0.0122678	0.00203975	1.81e-09	331693	Comparative body size at age 10 || id:ukb-a-34	TRUE	reported	igd	36.1724	NA
ukb-a-34	5	60706426	rs7727824	C	T	0.359952	-0.01041	0.00173137	1.83e-09	331693	Comparative body size at age 10 || id:ukb-a-34	TRUE	reported	igd	36.1509	NA
ukb-a-34	1	54743111	rs587271	T	C	0.687423	0.0112405	0.00187051	1.86e-09	331693	Comparative body size at age 10 || id:ukb-a-34	TRUE	reported	igd	36.1118	NA
ukb-a-34	5	77424836	rs1422067	T	C	0.238272	-0.0116411	0.00194895	2.33e-09	331693	Comparative body size at age 10 || id:ukb-a-34	TRUE	reported	igd	35.6766	NA
ukb-a-34	6	166416028	rs62425398	A	C	0.107214	0.0161202	0.00269937	2.35e-09	331693	Comparative body size at age 10 || id:ukb-a-34	TRUE	reported	igd	35.6626	NA
ukb-a-34	8	38332249	rs881299	C	T	0.412418	0.0100315	0.00168504	2.63e-09	331693	Comparative body size at age 10 || id:ukb-a-34	TRUE	reported	igd	35.4412	NA
ukb-a-34	5	170738836	rs918472	A	G	0.717778	0.0110346	0.00185467	2.69e-09	331693	Comparative body size at age 10 || id:ukb-a-34	TRUE	reported	igd	35.3979	NA
ukb-a-34	22	22106535	rs2876980	C	T	0.146715	0.013998	0.00235385	2.74e-09	331693	Comparative body size at age 10 || id:ukb-a-34	TRUE	reported	igd	35.3648	NA
ukb-a-34	5	156781955	rs13175179	A	G	0.210278	0.0121494	0.00204394	2.78e-09	331693	Comparative body size at age 10 || id:ukb-a-34	TRUE	reported	igd	35.3322	NA
ukb-a-34	20	22430241	rs73085586	A	G	0.201135	0.0123069	0.00207754	3.15e-09	331693	Comparative body size at age 10 || id:ukb-a-34	TRUE	reported	igd	35.091	NA
ukb-a-34	7	103128824	rs6944123	T	G	0.314451	0.0105998	0.00178946	3.16e-09	331693	Comparative body size at age 10 || id:ukb-a-34	TRUE	reported	igd	35.0872	NA
ukb-a-34	3	88098062	rs1040319	G	T	0.834752	0.0132096	0.00223656	3.5e-09	331693	Comparative body size at age 10 || id:ukb-a-34	TRUE	reported	igd	34.8831	NA
ukb-a-34	2	67693591	rs657667	A	G	0.581252	-0.0100453	0.00170148	3.56e-09	331693	Comparative body size at age 10 || id:ukb-a-34	TRUE	reported	igd	34.8554	NA
ukb-a-34	11	29191992	rs2467587	C	T	0.132514	-0.0145031	0.00245764	3.61e-09	331693	Comparative body size at age 10 || id:ukb-a-34	TRUE	reported	igd	34.8243	NA
ukb-a-34	2	45130956	rs13025101	A	G	0.205367	0.0121568	0.00206207	3.74e-09	331693	Comparative body size at age 10 || id:ukb-a-34	TRUE	reported	igd	34.7559	NA
ukb-a-34	1	118855812	rs12738523	T	A	0.310155	0.0106223	0.00180414	3.92e-09	331693	Comparative body size at age 10 || id:ukb-a-34	TRUE	reported	igd	34.6652	NA
ukb-a-34	10	87490850	rs17399739	G	A	0.0695257	0.0192109	0.00326751	4.12e-09	331693	Comparative body size at age 10 || id:ukb-a-34	TRUE	reported	igd	34.5668	NA
ukb-a-34	10	10535954	rs11256627	A	G	0.705761	0.0107841	0.00183436	4.13e-09	331693	Comparative body size at age 10 || id:ukb-a-34	TRUE	reported	igd	34.5618	NA
ukb-a-34	15	89415247	rs3817428	G	C	0.267231	0.01103	0.00187684	4.18e-09	331693	Comparative body size at age 10 || id:ukb-a-34	TRUE	reported	igd	34.5377	NA
ukb-a-34	9	32328019	rs7856471	C	T	0.264331	0.0110896	0.0018938	4.75e-09	331693	Comparative body size at age 10 || id:ukb-a-34	TRUE	reported	igd	34.2895	NA
ukb-a-34	3	131718729	rs6806453	C	T	0.200641	0.0121196	0.0020777	5.44e-09	331693	Comparative body size at age 10 || id:ukb-a-34	TRUE	reported	igd	34.0258	NA
ukb-a-34	4	130741313	rs2955476	T	C	0.594714	-0.00986664	0.00169591	5.96e-09	331693	Comparative body size at age 10 || id:ukb-a-34	TRUE	reported	igd	33.8478	NA
ukb-a-34	12	66374587	rs9669278	C	T	0.516489	-0.00969709	0.00167336	6.84e-09	331693	Comparative body size at age 10 || id:ukb-a-34	TRUE	reported	igd	33.5816	NA
ukb-a-34	15	24007729	rs824207	G	A	0.535225	0.00964	0.00166515	7.08e-09	331693	Comparative body size at age 10 || id:ukb-a-34	TRUE	reported	igd	33.5154	NA
ukb-a-34	4	42155174	rs4449446	A	T	0.237685	0.0112875	0.00195789	8.17e-09	331693	Comparative body size at age 10 || id:ukb-a-34	TRUE	reported	igd	33.2366	NA
ukb-a-34	3	25108179	rs1603977	A	T	0.700745	0.0104837	0.00181931	8.3e-09	331693	Comparative body size at age 10 || id:ukb-a-34	TRUE	reported	igd	33.2057	NA
ukb-a-34	7	138817193	rs11525873	C	T	0.0983855	-0.0160839	0.00279219	8.4e-09	331693	Comparative body size at age 10 || id:ukb-a-34	TRUE	reported	igd	33.1811	NA
ukb-a-34	5	75003678	rs2307111	C	T	0.393183	-0.00976276	0.00170355	1e-08	331693	Comparative body size at age 10 || id:ukb-a-34	TRUE	reported	igd	32.8422	NA
ukb-a-34	15	89989514	rs11073864	T	C	0.201906	0.0118579	0.00207472	1.1e-08	331693	Comparative body size at age 10 || id:ukb-a-34	TRUE	reported	igd	32.6658	NA
ukb-a-34	17	74095198	rs2666009	T	C	0.43724	-0.00952974	0.00167438	1.26e-08	331693	Comparative body size at age 10 || id:ukb-a-34	TRUE	reported	igd	32.393	NA
ukb-a-34	5	103964585	rs77960	A	G	0.32864	-0.0100776	0.00177125	1.28e-08	331693	Comparative body size at age 10 || id:ukb-a-34	TRUE	reported	igd	32.3707	NA
ukb-a-34	3	77742551	rs776106	A	C	0.742295	-0.0107961	0.00189899	1.31e-08	331693	Comparative body size at age 10 || id:ukb-a-34	TRUE	reported	igd	32.3211	NA
ukb-a-34	6	41747048	rs3807020	C	G	0.666936	-0.0100957	0.00177669	1.33e-08	331693	Comparative body size at age 10 || id:ukb-a-34	TRUE	reported	igd	32.2884	NA
ukb-a-34	11	115058585	rs11215403	A	G	0.244354	-0.0109968	0.00193528	1.33e-08	331693	Comparative body size at age 10 || id:ukb-a-34	TRUE	reported	igd	32.2881	NA
ukb-a-34	12	24582367	rs10842344	C	T	0.536464	-0.00953128	0.00167756	1.34e-08	331693	Comparative body size at age 10 || id:ukb-a-34	TRUE	reported	igd	32.2808	NA
ukb-a-34	1	7028842	rs2175171	C	G	0.558624	0.00950637	0.00167728	1.45e-08	331693	Comparative body size at age 10 || id:ukb-a-34	TRUE	reported	igd	32.123	NA
ukb-a-34	12	39430048	rs11170468	C	A	0.234547	-0.0110746	0.00196272	1.68e-08	331693	Comparative body size at age 10 || id:ukb-a-34	TRUE	reported	igd	31.8373	NA
ukb-a-34	11	126372550	rs10790809	G	A	0.559426	0.00942363	0.00167345	1.79e-08	331693	Comparative body size at age 10 || id:ukb-a-34	TRUE	reported	igd	31.7109	NA
ukb-a-34	12	99658692	rs11612454	T	G	0.254249	0.0107352	0.00191072	1.93e-08	331693	Comparative body size at age 10 || id:ukb-a-34	TRUE	reported	igd	31.5663	NA
ukb-a-34	9	129397014	rs10448285	T	C	0.355434	0.00977141	0.0017418	2.03e-08	331693	Comparative body size at age 10 || id:ukb-a-34	TRUE	reported	igd	31.4713	NA
ukb-a-34	20	36433288	rs2281148	C	T	0.250994	0.0107779	0.00192125	2.03e-08	331693	Comparative body size at age 10 || id:ukb-a-34	TRUE	reported	igd	31.4701	NA
ukb-a-34	10	70889053	rs4572029	G	A	0.203687	-0.0116644	0.00208587	2.25e-08	331693	Comparative body size at age 10 || id:ukb-a-34	TRUE	reported	igd	31.2714	NA
ukb-a-34	17	7524504	rs67603370	A	G	0.0768997	0.0177585	0.00317796	2.3e-08	331693	Comparative body size at age 10 || id:ukb-a-34	TRUE	reported	igd	31.2258	NA
ukb-a-34	8	41201081	rs13254935	C	A	0.117683	-0.0143129	0.00257722	2.8e-08	331693	Comparative body size at age 10 || id:ukb-a-34	TRUE	reported	igd	30.8425	NA
ukb-a-34	11	33777334	rs1402954	T	C	0.090328	0.0160461	0.00290137	3.2e-08	331693	Comparative body size at age 10 || id:ukb-a-34	TRUE	reported	igd	30.5865	NA
ukb-a-34	9	109620811	rs12343333	C	T	0.300323	-0.0100345	0.00181497	3.23e-08	331693	Comparative body size at age 10 || id:ukb-a-34	TRUE	reported	igd	30.5668	NA
ukb-a-34	18	77162462	rs657693	G	A	0.362511	0.00955009	0.00172845	3.29e-08	331693	Comparative body size at age 10 || id:ukb-a-34	TRUE	reported	igd	30.528	NA
ukb-a-34	2	188156578	rs1706252	C	A	0.678101	0.00982693	0.00178	3.38e-08	331693	Comparative body size at age 10 || id:ukb-a-34	TRUE	reported	igd	30.4785	NA
ukb-a-34	13	27936117	rs7997379	G	A	0.428963	-0.00926063	0.00167774	3.4e-08	331693	Comparative body size at age 10 || id:ukb-a-34	TRUE	reported	igd	30.467	NA
ukb-a-34	6	56218157	rs9382623	A	G	0.248936	0.0106137	0.00192598	3.57e-08	331693	Comparative body size at age 10 || id:ukb-a-34	TRUE	reported	igd	30.3688	NA
ukb-a-34	12	122492313	rs7299842	A	G	0.438843	0.00924213	0.00168722	4.31e-08	331693	Comparative body size at age 10 || id:ukb-a-34	TRUE	reported	igd	30.0053	NA
ukb-a-34	14	80307572	rs78228094	G	A	0.0482564	0.0215401	0.00393776	4.5e-08	331693	Comparative body size at age 10 || id:ukb-a-34	TRUE	reported	igd	29.9223	NA
ukb-a-34	3	153964496	rs355748	T	G	0.376764	0.00938974	0.00172033	4.82e-08	331693	Comparative body size at age 10 || id:ukb-a-34	TRUE	reported	igd	29.7907	NA
ukb-a-34	19	19473445	rs2905424	C	T	0.6517	0.00953107	0.00174834	5e-08	331693	Comparative body size at age 10 || id:ukb-a-34	TRUE	reported	igd	29.7186	NA
id.exposure	chr.exposure	pos.exposure	SNP	effect_allele.exposure	other_allele.exposure	eaf.exposure	beta.exposure	se.exposure	pval.exposure	samplesize.exposure	exposure	mr_keep.exposure	pval_origin.exposure	data_source.exposure	Fz	NA
ebi-a-GCST006701	15	78817929	rs8042849	T	C	0.658571	-0.0274399	0.00229522	5.4e-33	415311	Parental longevity (father's attained age) || id:ebi-a-GCST006701	TRUE	reported	igd	142.927	NA
ebi-a-GCST006701	19	45411941	rs429358	C	T	0.155016	0.0333765	0.00300605	1.9e-28	415311	Parental longevity (father's attained age) || id:ebi-a-GCST006701	TRUE	reported	igd	123.278	NA
ebi-a-GCST006701	9	22100176	rs1556516	C	G	0.498044	0.0201736	0.00217409	1.3e-20	415311	Parental longevity (father's attained age) || id:ebi-a-GCST006701	TRUE	reported	igd	86.1013	NA
ebi-a-GCST006701	6	160997118	rs74617384	T	A	0.079614	0.0333727	0.00401789	5.5e-17	415311	Parental longevity (father's attained age) || id:ebi-a-GCST006701	TRUE	reported	igd	68.9897	NA
ebi-a-GCST006701	12	111884608	rs3184504	C	T	0.517508	-0.0153613	0.00217469	1.7e-12	415311	Parental longevity (father's attained age) || id:ebi-a-GCST006701	TRUE	reported	igd	49.8952	NA
ebi-a-GCST006701	6	160922870	rs117733303	G	A	0.018527	0.0567732	0.00805629	2.7e-12	415311	Parental longevity (father's attained age) || id:ebi-a-GCST006701	TRUE	reported	igd	49.6609	NA
ebi-a-GCST006701	20	10964366	rs6108784	C	T	0.414227	0.0143312	0.00222016	1.2e-10	415311	Parental longevity (father's attained age) || id:ebi-a-GCST006701	TRUE	reported	igd	41.6672	NA
ebi-a-GCST006701	1	109817192	rs7528419	G	A	0.222843	-0.0158992	0.00261123	8.6e-10	415311	Parental longevity (father's attained age) || id:ebi-a-GCST006701	TRUE	reported	igd	37.073	NA
ebi-a-GCST006701	15	91442152	rs2521498	T	A	0.612148	0.0132251	0.002244	5e-09	415311	Parental longevity (father's attained age) || id:ebi-a-GCST006701	TRUE	reported	igd	34.7336	NA
ebi-a-GCST006701	11	113639842	rs61905747	C	A	0.191117	0.0159785	0.0027702	5.5e-09	415311	Parental longevity (father's attained age) || id:ebi-a-GCST006701	TRUE	reported	igd	33.2696	NA
ebi-a-GCST006701	19	41341229	rs12461964	G	A	0.495966	0.0125903	0.00217718	8.2e-09	415311	Parental longevity (father's attained age) || id:ebi-a-GCST006701	TRUE	reported	igd	33.4412	NA
ebi-a-GCST006701	15	47660194	rs74011415	A	G	0.118837	0.0191762	0.00336546	1.4e-08	415311	Parental longevity (father's attained age) || id:ebi-a-GCST006701	TRUE	reported	igd	32.4664	NA
ebi-a-GCST006701	20	61986949	rs2273500	C	T	0.144397	0.0176333	0.0030968	1.5e-08	415311	Parental longevity (father's attained age) || id:ebi-a-GCST006701	TRUE	reported	igd	32.4219	NA
ebi-a-GCST006701	19	45349369	rs2927472	C	T	0.836371	0.0168127	0.00295717	1.6e-08	415311	Parental longevity (father's attained age) || id:ebi-a-GCST006701	TRUE	reported	igd	32.3236	NA
ebi-a-GCST006701	8	59838133	rs13262617	G	A	0.029638	-0.0360409	0.00644301	3.1e-08	415311	Parental longevity (father's attained age) || id:ebi-a-GCST006701	TRUE	reported	igd	31.2904	NA
ebi-a-GCST006701	6	31425499	rs3131621	G	A	0.371342	0.0123669	0.00224504	3.6e-08	415311	Parental longevity (father's attained age) || id:ebi-a-GCST006701	TRUE	reported	igd	30.3439	NA
id.exposure	chr.exposure	pos.exposure	SNP	effect_allele.exposure	other_allele.exposure	eaf.exposure	beta.exposure	se.exposure	pval.exposure	samplesize.exposure	exposure	mr_keep.exposure	pval_origin.exposure	data_source.exposure	Fz	NA
ebi-a-GCST006696	19	45411941	rs429358	C	T	0.155089	0.0528775	0.0030211	1.3e-68	412937	Parental longevity (mother's attained age) || id:ebi-a-GCST006696	TRUE	reported	igd	306.344	NA
ebi-a-GCST006696	6	31154434	rs3130458	T	C	0.283928	0.0155109	0.00242695	1.6e-10	412937	Parental longevity (mother's attained age) || id:ebi-a-GCST006696	TRUE	reported	igd	40.8461	NA
ebi-a-GCST006696	6	161010118	rs10455872	G	A	0.079691	0.0251185	0.00403775	4.9e-10	412937	Parental longevity (mother's attained age) || id:ebi-a-GCST006696	TRUE	reported	igd	38.6996	NA
ebi-a-GCST006696	13	64836488	rs61949650	C	T	0.062469	-0.0251004	0.00451482	2.9e-08	412937	Parental longevity (mother's attained age) || id:ebi-a-GCST006696	TRUE	reported	igd	30.9085	NA
